# Supplementary material for: Oncogenic KRAS-Induced Protein Signature in the Tumor Secretome Identifies Laminin-C2 and Pentraxin-3 as Useful Biomarkers for the Early Diagnosis of Pancreatic Cancer
Source: Cancers (Basel). 2022 May 27;14(11):2653. doi: 10.3390/cancers14112653 (PMC9179463; doi:10.3390/cancers14112653)
Supplement: Supplementary file 1 [file cancers-14-02653-s001.zip]

Archive with 7 entries (7 files):
- File S1.pdf
- Heatmap S1  437 non-dysregulated proteins in KRAS cloned lines.png
- Heatmap S2  437 non-dysregulated proteins in Mock lines.png
- Heatmap S3 Global  600  identified proteins in KRAS cloned lines.png
- Heatmap S4 Global  600  identified proteins in Mock lines.png
- Suppl Table 2 of 163 dysregulated proteins_18 maggio.xlsx
- Suppl Table S1.xlsx
