# Supplementary material for: Oncogenic KRAS-Induced Protein Signature in the Tumor Secretome Identifies Laminin-C2 and Pentraxin-3 as Useful Biomarkers for the Early Diagnosis of Pancreatic Cancer
Source: Cancers (Basel). 2022 May 27;14(11):2653. doi: 10.3390/cancers14112653 (PMC9179463; doi:10.3390/cancers14112653)
Supplement: Supplementary file 1 [file cancers-14-02653-s001.zip › Suppl Table 2 of 163 dysregulated proteins_18 maggio.xlsx]

## Sheet: Foglio1
List of the 163 proteins dysregulated (cut-off ± 0.8916) in at least one KRAS-Clone
Entry	Protein names	Gene names	Entry name	Gene name*	Clone 38	Clone 21	Clone 30	Clone 19	Clone 36	Clone 7	Mock 1	Mock 2	Mock 3
P49588	Alanine--tRNA ligase, cytoplasmic (EC 6.1.1.7) (Alanyl-tRNA synthetase) (AlaRS) (Renal carcinoma antigen NY-REN-42)	AARS	SYAC_HUMAN	AARS	1.62169				0.479808	1.57723			0.395596
Q9BWD1	Acetyl-CoA acetyltransferase, cytosolic (EC 2.3.1.9) (Acetyl-CoA transferase-like protein) (Cytosolic acetoacetyl-CoA thiolase)	ACAT2 ACTL	THIC_HUMAN	ACAT2	1.49359					0.50745
P60709	Actin, cytoplasmic 1 (Beta-actin) [Cleaved into: Actin, cytoplasmic 1, N-terminally processed]	ACTB	ACTB_HUMAN	ACTB	1.13892	-0.000704957	-0.198487	-0.677641	0.345819	0.798118	-0.0303323	-0.0448931	0.235131
P00813	Adenosine deaminase (EC 3.5.4.4) (Adenosine aminohydrolase)	ADA ADA1	ADA_HUMAN	ADA	-1.54021		-0.340233		-0.325576	-0.674705	-0.0138381	0.0288329	0.0489373
Q86SQ4	Adhesion G-protein coupled receptor G6 (Developmentally regulated G-protein-coupled receptor) (G-protein coupled receptor 126) (Vascular inducible G protein-coupled receptor) [Cleaved into: ADGRG6 N-terminal fragment (ADGRG6-NTF); ADGRG6 C-terminal fragment (ADGRG6-CTF)]	ADGRG6 DREG GPR126 VIGR	AGRG6_HUMAN	GPR126	-1.45813	-0.695743	-0.837072	-0.577138		-1.62467	0.384976		0.256193
O00468	Agrin [Cleaved into: Agrin N-terminal 110 kDa subunit; Agrin C-terminal 110 kDa subunit; Agrin C-terminal 90 kDa fragment (C90); Agrin C-terminal 22 kDa fragment (C22)]	AGRN AGRIN	AGRIN_HUMAN	AGRN	-0.642683	-0.300244	0.208023	-0.175474	-1.04654	-0.0845634	0.591246	-0.106108	0.247805
P23526	Adenosylhomocysteinase (AdoHcyase) (EC 3.3.1.1) (S-adenosyl-L-homocysteine hydrolase)	AHCY SAHH	SAHH_HUMAN	AHCY	2.09305	1.01403	0.803547	0.0183435	0.720816	1.5943	-0.0587392	-0.187606	-0.120425
P08758	Annexin A5 (Anchorin CII) (Annexin V) (Annexin-5) (Calphobindin I) (CBP-I) (Endonexin II) (Lipocortin V) (Placental anticoagulant protein 4) (PP4) (Placental anticoagulant protein I) (PAP-I) (Thromboplastin inhibitor) (Vascular anticoagulant-alpha) (VAC-alpha)	ANXA5 ANX5 ENX2 PP4	ANXA5_HUMAN	ANXA5		0.361552	0.0388664	1.0635			0.175193	0.216615
Q5VT79	Annexin A8-like protein 1	ANXA8L1 ANXA8L2	AXA81_HUMAN	ANXA8L1	-0.0944042		-0.957683	-0.446662		-0.356845	0.106171	0.0380773	0.0690728
P31939	Bifunctional purine biosynthesis protein PURH [Cleaved into: Bifunctional purine biosynthesis protein PURH, N-terminally processed] [Includes: Phosphoribosylaminoimidazolecarboxamide formyltransferase (EC 2.1.2.3) (5-aminoimidazole-4-carboxamide ribonucleotide formyltransferase) (AICAR transformylase); IMP cyclohydrolase (EC 3.5.4.10) (ATIC) (IMP synthase) (Inosinicase)]	ATIC PURH OK/SW-cl.86	PUR9_HUMAN	ATIC	1.51859	0.483513		-0.574845	0.74586	1.61818	-0.342332
O75882	Attractin (DPPT-L) (Mahogany homolog)	ATRN KIAA0548 MGCA	ATRN_HUMAN	ATRN	-1.17265	-0.588632	0.549634	-0.100162	-0.841854	-1.09353	0.730773	-0.158605	0.129673
P61769	Beta-2-microglobulin [Cleaved into: Beta-2-microglobulin form pI 5.3]	B2M CDABP0092 HDCMA22P	B2MG_HUMAN	B2M	-1.04212	-0.747103	0.0227118	0.183501	-0.583625	-0.387214	0.419709	-0.104995	0.137564
P50895	Basal cell adhesion molecule (Auberger B antigen) (B-CAM cell surface glycoprotein) (F8/G253 antigen) (Lutheran antigen) (Lutheran blood group glycoprotein) (CD antigen CD239)	BCAM LU MSK19	BCAM_HUMAN	BCAM	-2.19524	-1.23078	-1.34338	-0.732818	-1.76025	-2.48166	0.050486	0.0452585	-0.268773
P00736	Complement C1r subcomponent (EC 3.4.21.41) (Complement component 1 subcomponent r) [Cleaved into: Complement C1r subcomponent heavy chain; Complement C1r subcomponent light chain]	C1R	C1R_HUMAN	C1R	-2.68443	-1.58229	0.460883	0.497551	-1.16658	-0.935999	0.414419	-0.0765003	0.160535
P09871	Complement C1s subcomponent (EC 3.4.21.42) (C1 esterase) (Complement component 1 subcomponent s) [Cleaved into: Complement C1s subcomponent heavy chain; Complement C1s subcomponent light chain]	C1S	C1S_HUMAN	C1S			0.445328		-1.22031	-0.785419	0.40911		0.150671
P01024	Complement C3 (C3 and PZP-like alpha-2-macroglobulin domain-containing protein 1) [Cleaved into: Complement C3 beta chain; C3-beta-c (C3bc); Complement C3 alpha chain; C3a anaphylatoxin; Acylation stimulating protein (ASP) (C3adesArg); Complement C3b alpha' chain; Complement C3c alpha' chain fragment 1; Complement C3dg fragment; Complement C3g fragment; Complement C3d fragment; Complement C3f fra…	C3 CPAMD1	CO3_HUMAN	C3	-3.39758	-0.892078	0.463459	0.7815	-0.134889	-0.63721	0.329852	0.0190913	-0.0381232
Q01518	Adenylyl cyclase-associated protein 1 (CAP 1)	CAP1 CAP	CAP1_HUMAN	CAP1	0.95902	-0.0654572	0.00619753	0.187559	0.905998		-0.0191959	0.0722255
P49368	T-complex protein 1 subunit gamma (TCP-1-gamma) (CCT-gamma) (hTRiC5)	CCT3 CCTG TRIC5	TCPG_HUMAN	CCT3	1.32114		0.202945		0.216133		-0.189949	-0.0687272
P50991	T-complex protein 1 subunit delta (TCP-1-delta) (CCT-delta) (Stimulator of TAR RNA-binding)	CCT4 CCTD SRB	TCPD_HUMAN	CCT4			-0.048359		0.158679	1.78523
P48643	T-complex protein 1 subunit epsilon (TCP-1-epsilon) (CCT-epsilon)	CCT5 CCTE KIAA0098	TCPE_HUMAN	CCT5	1.22719		-0.172856		0.161341	1.44083	0.0572896	0.188352
P40227	T-complex protein 1 subunit zeta (TCP-1-zeta) (Acute morphine dependence-related protein 2) (CCT-zeta-1) (HTR3) (Tcp20)	CCT6A CCT6 CCTZ	TCPZ_HUMAN	CCT6A	1.13174	0.0735071	-0.0176757		0.173259	1.37673	-0.122661
Q99832	T-complex protein 1 subunit eta (TCP-1-eta) (CCT-eta) (HIV-1 Nef-interacting protein) [Cleaved into: T-complex protein 1 subunit eta, N-terminally processed]	CCT7 CCTH NIP7-1	TCPH_HUMAN	CCT7		-0.0712212	0.0562081		0.160011	1.47809	-0.15218		0.67123
P50990	T-complex protein 1 subunit theta (TCP-1-theta) (CCT-theta) (Renal carcinoma antigen NY-REN-15)	CCT8 C21orf112 CCTQ KIAA0002	TCPQ_HUMAN	CCT8	1.11508		0.0329813		0.131788	1.25114	-0.259472
Q6YHK3	CD109 antigen (150 kDa TGF-beta-1-binding protein) (C3 and PZP-like alpha-2-macroglobulin domain-containing protein 7) (Platelet-specific Gov antigen) (p180) (r150) (CD antigen CD109)	CD109 CPAMD7	CD109_HUMAN	CD109	-1.03208	-0.258166	-0.507997	-0.241959	-1.14933	-0.843245	0.193991	-0.106108	0.00929275
P08571	Monocyte differentiation antigen CD14 (Myeloid cell-specific leucine-rich glycoprotein) (CD antigen CD14) [Cleaved into: Monocyte differentiation antigen CD14, urinary form; Monocyte differentiation antigen CD14, membrane-bound form]	CD14	CD14_HUMAN	CD14	-3.50278				-0.997029	-0.663668			-0.212328
P19835	Bile salt-activated lipase (BAL) (EC 3.1.1.13) (EC 3.1.1.3) (Bile salt-stimulated lipase) (BSSL) (Bucelipase) (Carboxyl ester lipase) (Cholesterol esterase) (Pancreatic lysophospholipase) (Sterol esterase)	CEL BAL	CEL_HUMAN	CEL	-3.83261	-0.561543	-0.238961	0.354479	-2.50176	-3.12786	0.0309179		-0.195835
P00751	Complement factor B (EC 3.4.21.47) (C3/C5 convertase) (Glycine-rich beta glycoprotein) (GBG) (PBF2) (Properdin factor B) [Cleaved into: Complement factor B Ba fragment; Complement factor B Bb fragment]	CFB BF BFD	CFAB_HUMAN	CFB	-4.66228	-1.01687	0.703576	2.1835	-0.57629	-0.767585	-0.0554328	-0.0921734	-0.0432604
P08603	Complement factor H (H factor 1)	CFH HF HF1 HF2	CFAH_HUMAN	CFH	-3.50046	0.425921	1.63438		-0.437718	0.853129	-0.176717	-0.0902836	0.0725598
P05156	Complement factor I (EC 3.4.21.45) (C3B/C4B inactivator) [Cleaved into: Complement factor I heavy chain; Complement factor I light chain]	CFI IF	CFAI_HUMAN	CFI	-5.4494		-0.575941	2.81074	-2.72738	-1.22333	0.116957		-0.138086
P23528	Cofilin-1 (18 kDa phosphoprotein) (p18) (Cofilin, non-muscle isoform)	CFL1 CFL	COF1_HUMAN	CFL1	0.606735	-0.578072	-0.0696176	-0.979532	0.776566	0.92713	0.223477	0.273982	-0.228426
Q9Y281	Cofilin-2 (Cofilin, muscle isoform)	CFL2	COF2_HUMAN	CFL2			-0.0928965	-0.965044	0.758221	0.851298	0.207204	0.272758
P12277	Creatine kinase B-type (EC 2.7.3.2) (B-CK) (Creatine kinase B chain)	CKB CKBB	KCRB_HUMAN	CKB	2.01007				0.852649
O00299	Chloride intracellular channel protein 1 (Chloride channel ABP) (Nuclear chloride ion channel 27) (NCC27) (Regulatory nuclear chloride ion channel protein) (hRNCC)	CLIC1 G6 NCC27	CLIC1_HUMAN	CLIC1	0.818428	0.802413	0.40703	0.290513	0.685192	1.10668	-0.142403	-0.0554545	0.0358432
Q00610	Clathrin heavy chain 1 (Clathrin heavy chain on chromosome 17) (CLH-17)	CLTC CLH17 CLTCL2 KIAA0034	CLH1_HUMAN	CLTC	-1.39492	-0.0177281	-0.118097		-1.72738	-0.622124	-0.122661		0.364899
P10909	Clusterin (Aging-associated gene 4 protein) (Apolipoprotein J) (Apo-J) (Complement cytolysis inhibitor) (CLI) (Complement-associated protein SP-40,40) (Ku70-binding protein 1) (NA1/NA2) (Testosterone-repressed prostate message 2) (TRPM-2) [Cleaved into: Clusterin beta chain (ApoJalpha) (Complement cytolysis inhibitor a chain); Clusterin alpha chain (ApoJbeta) (Complement cytolysis inhibitor b cha…	CLU APOJ CLI KUB1 AAG4	CLUS_HUMAN	CLU	-1.18229	-1.15036	-0.900914	1.1943	-3.2625	-3.82054	0.180811	-0.200799	0.418197
Q96DG6	Carboxymethylenebutenolidase homolog (EC 3.1.-.-)	CMBL	CMBL_HUMAN	CMBL				1.06424
O43405	Cochlin (COCH-5B2)	COCH COCH5B2 UNQ257/PRO294	COCH_HUMAN	COCH		-0.121858		-0.246515	1.70813			-0.246367
Q14019	Coactosin-like protein	COTL1 CLP	COTL1_HUMAN	COTL1	1.11726	0.068139	-0.127759	0.132488	0.606316	0.317625	0.247323	0.021278	0.10202
Q9UI42	Carboxypeptidase A4 (EC 3.4.17.-) (Carboxypeptidase A3)	CPA4 CPA3 UNQ694/PRO1339	CBPA4_HUMAN	CPA4	-1.60835	-1.05151	-0.770476	-1.27881	-1.7658	-2.56136	0.86963	0.00913661	0.325586
P16870	Carboxypeptidase E (CPE) (EC 3.4.17.10) (Carboxypeptidase H) (CPH) (Enkephalin convertase) (Prohormone-processing carboxypeptidase)	CPE	CBPE_HUMAN	CPE	-1.53015		-0.079709	0.666992	-2.38531	-0.0172899	0.0771752		0.289264
Q9H3G5	Probable serine carboxypeptidase CPVL (EC 3.4.16.-) (Carboxypeptidase, vitellogenic-like) (Vitellogenic carboxypeptidase-like protein) (VCP-like protein) (hVLP)	CPVL VLP PSEC0124 UNQ197/PRO223	CPVL_HUMAN	CPVL	2.23022		1.50031	2.33997				-0.240417
P29373	Cellular retinoic acid-binding protein 2 (Cellular retinoic acid-binding protein II) (CRABP-II)	CRABP2	RABP2_HUMAN	CRABP2	-1.28931	-0.0942093	-0.367675		-0.864688	-0.02736	-0.0832205		-0.18444
O75390	Citrate synthase, mitochondrial (EC 2.3.3.1) (Citrate (Si)-synthase)	CS	CISY_HUMAN	CS	1.3027	0.163096	0.301555	-0.361581	0.737858	0.848548	-0.18854	-0.0860407
P09603	Macrophage colony-stimulating factor 1 (CSF-1) (M-CSF) (MCSF) (Lanimostim) [Cleaved into: Processed macrophage colony-stimulating factor 1]	CSF1	CSF1_HUMAN	CSF1	-1.94382		1.01061		-0.669236	-1.14962	0.0866837
Q15828	Cystatin-M (Cystatin-6) (Cystatin-E)	CST6	CYTM_HUMAN	CST6	-0.0266008	-0.448549	-0.29926	-0.97378	-0.254495	0.0932643	0.738201	-0.0978577	0.263145
P29279	Connective tissue growth factor (CCN family member 2) (Hypertrophic chondrocyte-specific protein 24) (Insulin-like growth factor-binding protein 8) (IBP-8) (IGF-binding protein 8) (IGFBP-8)	CTGF CCN2 HCS24 IGFBP8	CTGF_HUMAN	CTGF	-0.987898	-0.467524	-0.6121	-1.43601		-0.0509625		0.573236	0.0791936
P07858	Cathepsin B (EC 3.4.22.1) (APP secretase) (APPS) (Cathepsin B1) [Cleaved into: Cathepsin B light chain; Cathepsin B heavy chain]	CTSB CPSB	CATB_HUMAN	CTSB	-1.61076	-0.423378	-0.749441	0.444276	-0.72173	-0.818262	0.36455		0.091277
P07339	Cathepsin D (EC 3.4.23.5) [Cleaved into: Cathepsin D light chain; Cathepsin D heavy chain]	CTSD CPSD	CATD_HUMAN	CTSD	-2.15111	-0.241572	-0.623811	-0.735377	-1.59841	-1.58695	0.146448	-0.190134	0.110834
P09668	Pro-cathepsin H [Cleaved into: Cathepsin H mini chain; Cathepsin H (EC 3.4.22.16); Cathepsin H heavy chain; Cathepsin H light chain]	CTSH CPSB	CATH_HUMAN	CTSH	-1.306	-0.475733	0.220261	-0.643837	-0.975524	-0.648045	0.646432	-0.167045	0.264532
O60911	Cathepsin L2 (EC 3.4.22.43) (Cathepsin U) (Cathepsin V)	CTSV CATL2 CTSL2 CTSU UNQ268/PRO305	CATL2_HUMAN	CTSV	-1.15321	-1.48005	-0.22832	0.0251626	-1.14867	-1.45695	0.77478	-0.0344085	0.445349
P09341	Growth-regulated alpha protein (C-X-C motif chemokine 1) (GRO-alpha(1-73)) (Melanoma growth stimulatory activity) (MGSA) (Neutrophil-activating protein 3) (NAP-3) [Cleaved into: GRO-alpha(4-73); GRO-alpha(5-73); GRO-alpha(6-73)]	CXCL1 GRO GRO1 GROA MGSA SCYB1	GROA_HUMAN	CXCL1				3.86348
P19876	C-X-C motif chemokine 3 (GRO-gamma(1-73)) (Growth-regulated protein gamma) (GRO-gamma) (Macrophage inflammatory protein 2-beta) (MIP2-beta) [Cleaved into: GRO-gamma(5-73)]	CXCL3 GRO3 GROG SCYB3	CXCL3_HUMAN	CXCL3	-4.72852		2.09983	3.89484	1.0637	0.567784	0.122806
O00622	Protein CYR61 (CCN family member 1) (Cysteine-rich angiogenic inducer 61) (Insulin-like growth factor-binding protein 10) (IBP-10) (IGF-binding protein 10) (IGFBP-10) (Protein GIG1)	CYR61 CCN1 GIG1 IGFBP10	CYR61_HUMAN	CYR61	-1.03855	-0.993671	0.186822	-1.3247	0.196803	-0.881703	0.645303	-0.0830623	0.17609
Q14574	Desmocollin-3 (Cadherin family member 3) (Desmocollin-4) (HT-CP)	DSC3 CDHF3 DSC4	DSC3_HUMAN	DSC3	-0.730038	-1.17848	-0.119446	-0.595849	-1.42988	-1.32152	0.527755	-0.0310815	0.212321
P68104	Elongation factor 1-alpha 1 (EF-1-alpha-1) (Elongation factor Tu) (EF-Tu) (Eukaryotic elongation factor 1 A-1) (eEF1A-1) (Leukocyte receptor cluster member 7)	EEF1A1 EEF1A EF1A LENG7	EF1A1_HUMAN	EEF1A1	1.71358	0.420665	-0.242945	-0.633299	-0.00521394	1.54927	-0.239949	-0.0693475	0.654406
P26641	Elongation factor 1-gamma (EF-1-gamma) (eEF-1B gamma)	EEF1G EF1G PRO1608	EF1G_HUMAN	EEF1G	1.42882	0.227117	0.447932	0.317923	0.259014	0.749798	-0.0490253	-0.142197	0.154116
P13639	Elongation factor 2 (EF-2)	EEF2 EF2	EF2_HUMAN	EEF2	1.76045	0.113144	-0.152792	-0.176343	-0.0116455	1.31563	-0.116905	-0.0970669	0.415703
Q12805	EGF-containing fibulin-like extracellular matrix protein 1 (Extracellular protein S1-5) (Fibrillin-like protein) (Fibulin-3) (FIBL-3)	EFEMP1 FBLN3 FBNL	FBLN3_HUMAN	EFEMP1	-1.95785	-0.845237	0.338513	0.325309	-1.33605	-1.62518	0.542377	-0.0866685	0.250606
P60842	Eukaryotic initiation factor 4A-I (eIF-4A-I) (eIF4A-I) (EC 3.6.4.13) (ATP-dependent RNA helicase eIF4A-1)	EIF4A1 DDX2A EIF4A	IF4A1_HUMAN	EIF4A1	0.891712	0.219873	-0.0919505	-0.643356	-0.456368		-0.28786	-0.0306284
Q04637	Eukaryotic translation initiation factor 4 gamma 1 (eIF-4-gamma 1) (eIF-4G 1) (eIF-4G1) (p220)	EIF4G1 EIF4F EIF4G EIF4GI	IF4G1_HUMAN	EIF4G1	0.0523829	-0.0735926	0.897038	-0.0958812		-0.0545622	0.223325	-0.0139636	-0.539812
P10768	S-formylglutathione hydrolase (FGH) (EC 3.1.2.12) (Esterase D) (Methylumbelliferyl-acetate deacetylase) (EC 3.1.1.56)	ESD	ESTD_HUMAN	ESD	1.401
Q01469	Fatty acid-binding protein, epidermal (Epidermal-type fatty acid-binding protein) (E-FABP) (Fatty acid-binding protein 5) (Psoriasis-associated fatty acid-binding protein homolog) (PA-FABP)	FABP5	FABP5_HUMAN	FABP5	0.901884	-0.172429	0.545993	-0.0369283	0.662824	0.407582		-0.163398	-0.726075
Q92520	Protein FAM3C (Interleukin-like EMT inducer)	FAM3C ILEI GS3786	FAM3C_HUMAN	FAM3C	-0.941087	-0.0390038	0.346909	-2.02076	-0.229697	0.140955	0.547218	-0.0872965	0.0474883
Q9NYQ8	Protocadherin Fat 2 (hFat2) (Cadherin family member 8) (Multiple epidermal growth factor-like domains protein 1) (Multiple EGF-like domains protein 1)	FAT2 CDHF8 KIAA0811 MEGF1	FAT2_HUMAN	FAT2	-0.988524	-1.37505	-0.539117		-1.4207	-0.278386	-0.0587392	-0.452022	0.34144
P23142	Fibulin-1 (FIBL-1)	FBLN1 PP213	FBLN1_HUMAN	FBLN1	-1.25538	-1.05795	0.167991	-0.271366	-1.21443	-0.472234	0.656548	-0.257457	0.265917
P98095	Fibulin-2 (FIBL-2)	FBLN2	FBLN2_HUMAN	FBLN2	-2.0601		-0.610203		-2.24055	-1.01829	0.292857		0.216626
P14324	Farnesyl pyrophosphate synthase (FPP synthase) (FPS) (EC 2.5.1.10) ((2E,6E)-farnesyl diphosphate synthase) (Dimethylallyltranstransferase) (EC 2.5.1.1) (Farnesyl diphosphate synthase) (Geranyltranstransferase)	FDPS FPS KIAA1293	FPPS_HUMAN	FDPS	1.1425	0.67578	0.596158	0.343609	0.986254	0.853129
Q02790	Peptidyl-prolyl cis-trans isomerase FKBP4 (PPIase FKBP4) (EC 5.2.1.8) (51 kDa FK506-binding protein) (FKBP51) (52 kDa FK506-binding protein) (52 kDa FKBP) (FKBP-52) (59 kDa immunophilin) (p59) (FK506-binding protein 4) (FKBP-4) (FKBP59) (HSP-binding immunophilin) (HBI) (Immunophilin FKBP52) (Rotamase) [Cleaved into: Peptidyl-prolyl cis-trans isomerase FKBP4, N-terminally processed]	FKBP4 FKBP52	FKBP4_HUMAN	FKBP4	1.06767	0.246257	0.294049	-0.634732	0.0253525	0.837492	-0.0650054	-0.280076	0.169592
Q16658	Fascin (55 kDa actin-bundling protein) (Singed-like protein) (p55)	FSCN1 FAN1 HSN SNL	FSCN1_HUMAN	FSCN1	1.1339	0.399448	0.230129	0.57498	0.504126	0.729011	0.0196407	-0.163398	-0.208091
P04066	Tissue alpha-L-fucosidase (EC 3.2.1.51) (Alpha-L-fucosidase I) (Alpha-L-fucoside fucohydrolase 1) (Alpha-L-fucosidase 1)	FUCA1 Nbla10230	FUCO_HUMAN	FUCA1	-1.18014	0.456032	0.342717	0.124043	-0.641832	-0.216977	0.258879	0.0346176	0.0579211
Q99988	Growth/differentiation factor 15 (GDF-15) (Macrophage inhibitory cytokine 1) (MIC-1) (NSAID-activated gene 1 protein) (NAG-1) (NSAID-regulated gene 1 protein) (NRG-1) (Placental TGF-beta) (Placental bone morphogenetic protein) (Prostate differentiation factor)	GDF15 MIC1 PDF PLAB PTGFB	GDF15_HUMAN	GDF15	-0.40158	0.228321	1.06251	-0.422544	0.670319	1.20242	0.253853	-0.0893397
P15586	N-acetylglucosamine-6-sulfatase (EC 3.1.6.14) (Glucosamine-6-sulfatase) (G6S)	GNS	GNS_HUMAN	GNS	0.0335399	0.320377	-0.638377	-0.237418	-0.234063	-1.01562	0.314316	0.0220061	0.146315
P35052	Glypican-1 [Cleaved into: Secreted glypican-1]	GPC1	GPC1_HUMAN	GPC1	-1.56521	-0.876209	0.627509	-0.779059		-2.18112	0.613344	-0.0298736	0.020661
P28799	Granulins (Proepithelin) (PEPI) [Cleaved into: Acrogranin (Glycoprotein of 88 Kda) (GP88) (Glycoprotein 88) (Progranulin); Paragranulin; Granulin-1 (Granulin G); Granulin-2 (Granulin F); Granulin-3 (Granulin B); Granulin-4 (Granulin A); Granulin-5 (Granulin C); Granulin-6 (Granulin D); Granulin-7 (Granulin E)]	GRN	GRN_HUMAN	GRN	-2.00902	-1.21859	-0.886408	-0.578286	-1.45861	-1.80752	0.267266	-0.207441	0.094555
P09211	Glutathione S-transferase P (EC 2.5.1.18) (GST class-pi) (GSTP1-1)	GSTP1 FAEES3 GST3	GSTP1_HUMAN	GSTP1	-0.289121	-0.297469	-0.283623	-0.104787	-0.518274	-0.919651	-0.0370194	-0.0236989	-0.0218061
P07900	Heat shock protein HSP 90-alpha (Heat shock 86 kDa) (HSP 86) (HSP86) (Lipopolysaccharide-associated protein 2) (LAP-2) (LPS-associated protein 2) (Renal carcinoma antigen NY-REN-38)	HSP90AA1 HSP90A HSPC1 HSPCA	HS90A_HUMAN	HSP90AA1	1.00536	0.340555	0.209252	0.0771278	-0.12043	0.628906	-0.17552	-0.0374397	0.212321
P08238	Heat shock protein HSP 90-beta (HSP 90) (Heat shock 84 kDa) (HSP 84) (HSP84)	HSP90AB1 HSP90B HSPC2 HSPCB	HS90B_HUMAN	HSP90AB1	0.94679	0.114447	-0.00675903	-0.103464	-0.0943193	0.742903	-0.173925	-0.0606873	0.276951
P38646	Stress-70 protein, mitochondrial (75 kDa glucose-regulated protein) (GRP-75) (Heat shock 70 kDa protein 9) (Mortalin) (MOT) (Peptide-binding protein 74) (PBP74)	HSPA9 GRP75 HSPA9B mt-HSP70	GRP75_HUMAN	HSPA9	1.4744	0.637329	0.74863	-0.336501	1.32816	1.24139	0.251334	-0.123557	-0.115006
P04792	Heat shock protein beta-1 (HspB1) (28 kDa heat shock protein) (Estrogen-regulated 24 kDa protein) (Heat shock 27 kDa protein) (HSP 27) (Stress-responsive protein 27) (SRP27)	HSPB1 HSP27 HSP28	HSPB1_HUMAN	HSPB1			-0.771688		-1.78515		-0.464428
P10809	60 kDa heat shock protein, mitochondrial (EC 3.6.4.9) (60 kDa chaperonin) (Chaperonin 60) (CPN60) (Heat shock protein 60) (HSP-60) (Hsp60) (HuCHA60) (Mitochondrial matrix protein P1) (P60 lymphocyte protein)	HSPD1 HSP60	CH60_HUMAN	HSPD1	1.22314		-0.277588	-0.418632	0.448549	1.90876	-0.337416		-0.136255
P98160	Basement membrane-specific heparan sulfate proteoglycan core protein (HSPG) (Perlecan) (PLC) [Cleaved into: Endorepellin; LG3 peptide]	HSPG2	PGBM_HUMAN	HSPG2	-2.01986	-0.258671	0.289845	-0.712761	-1.35837	-0.607447	0.504296	-0.0997574	0.18666
Q9Y4L1	Hypoxia up-regulated protein 1 (150 kDa oxygen-regulated protein) (ORP-150) (170 kDa glucose-regulated protein) (GRP-170)	HYOU1 GRP170 ORP150	HYOU1_HUMAN	HYOU1	1.49695		0.126329		-0.433294	0.0115219	-0.606128		-0.157637
P05362	Intercellular adhesion molecule 1 (ICAM-1) (Major group rhinovirus receptor) (CD antigen CD54)	ICAM1	ICAM1_HUMAN	ICAM1	-1.47998	0.0368782	0.648038	0.266415	0.0156768	-0.234951	-0.269653	0.158199	-0.0960201
Q16270	Insulin-like growth factor-binding protein 7 (IBP-7) (IGF-binding protein 7) (IGFBP-7) (IGFBP-rP1) (MAC25 protein) (PGI2-stimulating factor) (Prostacyclin-stimulating factor) (Tumor-derived adhesion factor) (TAF)	IGFBP7 MAC25 PSF	IBP7_HUMAN	IGFBP7	-0.900748	-0.48695	0.400323	-0.494842	-0.448027	-0.426208	0.602919	-0.0992823	0.249206
P05161	Ubiquitin-like protein ISG15 (Interferon-induced 15 kDa protein) (Interferon-induced 17 kDa protein) (IP17) (Ubiquitin cross-reactive protein) (hUCRP)	ISG15 G1P2 UCRP	ISG15_HUMAN	ISG15	0.563604	-1.20261	-2.13729	-0.604945	-0.700793	-0.31595	-0.181514	0.0959339	-0.129684
Q92876	Kallikrein-6 (EC 3.4.21.-) (Neurosin) (Protease M) (SP59) (Serine protease 18) (Serine protease 9) (Zyme)	KLK6 PRSS18 PRSS9	KLK6_HUMAN	KLK6	-1.44819	-1.14225				0.171797			0.242186
Q14974	Importin subunit beta-1 (Importin-90) (Karyopherin subunit beta-1) (Nuclear factor p97) (Pore targeting complex 97 kDa subunit) (PTAC97)	KPNB1 NTF97	IMB1_HUMAN	KPNB1	-0.421312		-0.125821		-1.10388	-0.0347896	-0.0299717		0.755492
Q16787	Laminin subunit alpha-3 (Epiligrin 170 kDa subunit) (E170) (Epiligrin subunit alpha) (Kalinin subunit alpha) (Laminin-5 subunit alpha) (Laminin-6 subunit alpha) (Laminin-7 subunit alpha) (Nicein subunit alpha)	LAMA3 LAMNA	LAMA3_HUMAN	LAMA3	-0.946248	-0.387348	-0.537313	1.37657	-0.602015	0.285445	0.261533	-0.128073	0.194392
Q13751	Laminin subunit beta-3 (Epiligrin subunit bata) (Kalinin B1 chain) (Kalinin subunit beta) (Laminin B1k chain) (Laminin-5 subunit beta) (Nicein subunit beta)	LAMB3 LAMNB1	LAMB3_HUMAN	LAMB3	-0.40492	-0.417342	-0.614543	1.35388	-0.828061	-0.29127	0.259174	-0.0206964	0.19381
Q13753	Laminin subunit gamma-2 (Cell-scattering factor 140 kDa subunit) (CSF 140 kDa subunit) (Epiligrin subunit gamma) (Kalinin subunit gamma) (Kalinin/nicein/epiligrin 100 kDa subunit) (Ladsin 140 kDa subunit) (Laminin B2t chain) (Laminin-5 subunit gamma) (Large adhesive scatter factor 140 kDa subunit) (Nicein subunit gamma)	LAMC2 LAMB2T LAMNB2	LAMC2_HUMAN	LAMC2	1.80404	-0.298682	-0.0579328	1.2747	-0.328561	0.369714	0.304342	-0.0619213	0.146315
P80188	Neutrophil gelatinase-associated lipocalin (NGAL) (25 kDa alpha-2-microglobulin-related subunit of MMP-9) (Lipocalin-2) (Oncogene 24p3) (Siderocalin LCN2) (p25)	LCN2 HNL NGAL	NGAL_HUMAN	LCN2	-4.57769	0.362648	0.990207	1.18215	0.638194	-0.228354	0.406449	0.0126579	-0.112844
P00338	L-lactate dehydrogenase A chain (LDH-A) (EC 1.1.1.27) (Cell proliferation-inducing gene 19 protein) (LDH muscle subunit) (LDH-M) (Renal carcinoma antigen NY-REN-59)	LDHA PIG19	LDHA_HUMAN	LDHA	0.818428	0.235522	-0.0335713	-1.21457	-0.178482	0.619256	-0.208394	0.0423903	0.293346
P01130	Low-density lipoprotein receptor (LDL receptor)	LDLR	LDLR_HUMAN	LDLR	-0.60187	0.438457	1.33359	-0.570041	0.699913	0.741915	0.622547	-0.29143	-0.00767837
P09382	Galectin-1 (Gal-1) (14 kDa laminin-binding protein) (HLBP14) (14 kDa lectin) (Beta-galactoside-binding lectin L-14-I) (Galaptin) (HBL) (HPL) (Lactose-binding lectin 1) (Lectin galactoside-binding soluble 1) (Putative MAPK-activating protein PM12) (S-Lac lectin 1)	LGALS1	LEG1_HUMAN	LGALS1	0.97356	0.695063	-0.194624			0.703868			-0.0864435
Q08380	Galectin-3-binding protein (Basement membrane autoantigen p105) (Lectin galactoside-binding soluble 3-binding protein) (Mac-2-binding protein) (MAC2BP) (Mac-2 BP) (Tumor-associated antigen 90K)	LGALS3BP M2BP	LG3BP_HUMAN	LGALS3BP	-0.961227	-0.831877	-0.488447	0.0339044	-0.730832	-0.379024	0.33546	-0.0640833	0.0714512
Q99538	Legumain (EC 3.4.22.34) (Asparaginyl endopeptidase) (Protease, cysteine 1)	LGMN PRSC1	LGMN_HUMAN	LGMN	0.97356	-0.192101	0.426966	-0.103794	0.171939	0.813245	0.444572	-0.22634	0.310899
P02750	Leucine-rich alpha-2-glycoprotein (LRG)	LRG1 LRG	A2GL_HUMAN	LRG1	-2.97698		0.600846	1.98679	-0.898938	-1.01228	0.233874		-0.05359
O00754	Lysosomal alpha-mannosidase (Laman) (EC 3.2.1.24) (Lysosomal acid alpha-mannosidase) (Mannosidase alpha class 2B member 1) (Mannosidase alpha-B) [Cleaved into: Lysosomal alpha-mannosidase A peptide; Lysosomal alpha-mannosidase B peptide; Lysosomal alpha-mannosidase C peptide; Lysosomal alpha-mannosidase D peptide; Lysosomal alpha-mannosidase E peptide]	MAN2B1 LAMAN MANB	MA2B1_HUMAN	MAN2B1	-1.01986		-0.344733		-1.14966	-1.31616	0.55445		0.135141
O00462	Beta-mannosidase (EC 3.2.1.25) (Lysosomal beta A mannosidase) (Mannanase) (Mannase)	MANBA MANB1	MANBA_HUMAN	MANBA	-0.730038	-0.176406	0.0165849	-0.385698	-1.37795	-0.610723	0.462622	-0.322889	0.216626
P21741	Midkine (MK) (Amphiregulin-associated protein) (ARAP) (Midgestation and kidney protein) (Neurite outgrowth-promoting factor 2) (Neurite outgrowth-promoting protein)	MDK MK1 NEGF2	MK_HUMAN	MDK	-1.03111	-0.0694452	0.53746	-0.207445	-0.415335	0.407582	0.216959	-0.517385	-0.0790387
P08581	Hepatocyte growth factor receptor (HGF receptor) (EC 2.7.10.1) (HGF/SF receptor) (Proto-oncogene c-Met) (Scatter factor receptor) (SF receptor) (Tyrosine-protein kinase Met)	MET	MET_HUMAN	MET	-0.451424	-0.171159	-0.19808	-1.88275	0.158679			0.105584	0.230882
P09237	Matrilysin (EC 3.4.24.23) (Matrin) (Matrix metalloproteinase-7) (MMP-7) (Pump-1 protease) (Uterine metalloproteinase)	MMP7 MPSL1 PUMP1	MMP7_HUMAN	MMP7	-4.11347		-0.301445		0.309083	-1.66812	0.809447		-0.120244
P14780	Matrix metalloproteinase-9 (MMP-9) (EC 3.4.24.35) (92 kDa gelatinase) (92 kDa type IV collagenase) (Gelatinase B) (GELB) [Cleaved into: 67 kDa matrix metalloproteinase-9; 82 kDa matrix metalloproteinase-9]	MMP9 CLG4B	MMP9_HUMAN	MMP9			0.936515		4.05532	2.96339
P20591	Interferon-induced GTP-binding protein Mx1 (Interferon-induced protein p78) (IFI-78K) (Interferon-regulated resistance GTP-binding protein MxA) (Myxoma resistance protein 1) (Myxovirus resistance protein 1) [Cleaved into: Interferon-induced GTP-binding protein Mx1, N-terminally processed]	MX1	MX1_HUMAN	MX1		-1.37067		-1.41535	-1.35456	0.666874	-0.679733	-0.0138143
P43490	Nicotinamide phosphoribosyltransferase (NAmPRTase) (Nampt) (EC 2.4.2.12) (Pre-B-cell colony-enhancing factor 1) (Pre-B cell-enhancing factor) (Visfatin)	NAMPT PBEF PBEF1	NAMPT_HUMAN	NAMPT			0.023934		1.22061	1.92626	0.0659179		0.33089
P15531	Nucleoside diphosphate kinase A (NDK A) (NDP kinase A) (EC 2.7.4.6) (Granzyme A-activated DNase) (GAAD) (Metastasis inhibition factor nm23) (NM23-H1) (Tumor metastatic process-associated protein)	NME1 NDPKA NM23	NDKA_HUMAN	NME1	0.891712	0.0505532	0.0990861	0.0440864	0.496768	0.406335	0.142615	0.0848255	0.128912
P22392	Nucleoside diphosphate kinase B (NDK B) (NDP kinase B) (EC 2.7.4.6) (C-myc purine-binding transcription factor PUF) (Histidine protein kinase NDKB) (EC 2.7.13.3) (nm23-H2)	NME2 NM23B	NDKB_HUMAN	NME1-NME2	0.949244	0.0532727	0.110637	0.055826	0.552582	0.415037	0.187338	0.0848255	0.131498
Q02818	Nucleobindin-1 (CALNUC)	NUCB1 NUC	NUCB1_HUMAN	NUCB1	-0.894867		0.232699	0.65727	-0.732314	-0.0378401	0.0260709		-0.0377814
Q9Y266	Nuclear migration protein nudC (Nuclear distribution protein C homolog)	NUDC	NUDC_HUMAN	NUDC	0.955769	0.173132			0.408779	0.745862	0.115328		0.190604
Q9UQ80	Proliferation-associated protein 2G4 (Cell cycle protein p38-2G4 homolog) (hG4-1) (ErbB3-binding protein 1)	PA2G4 EBP1	PA2G4_HUMAN	PA2G4	1.06164	0.290723	0.31873	-0.045	0.500978	0.815125	0.131536	-0.0888679	-0.0788629
P22234	Multifunctional protein ADE2 [Includes: Phosphoribosylaminoimidazole-succinocarboxamide synthase (EC 6.3.2.6) (SAICAR synthetase); Phosphoribosylaminoimidazole carboxylase (EC 4.1.1.21) (AIR carboxylase) (AIRC)]	PAICS ADE2 AIRC PAIS	PUR6_HUMAN	PAICS	1.97958	0.0841839	0.334297		0.325789	1.46618		-0.147264
Q8NBP7	Proprotein convertase subtilisin/kexin type 9 (EC 3.4.21.-) (Neural apoptosis-regulated convertase 1) (NARC-1) (Proprotein convertase 9) (PC9) (Subtilisin/kexin-like protease PC9)	PCSK9 NARC1 PSEC0052	PCSK9_HUMAN	PCSK9	0.768345	-0.322104	1.4686	0.108431	-0.336988	-0.149435	0.649812	-0.249527	0.0777747
O15067	Phosphoribosylformylglycinamidine synthase (FGAM synthase) (FGAMS) (EC 6.3.5.3) (Formylglycinamide ribonucleotide amidotransferase) (FGAR amidotransferase) (FGAR-AT) (Formylglycinamide ribotide amidotransferase)	PFAS KIAA0361	PUR4_HUMAN	PFAS	1.27493		0.0647166		0.504126	0.738947
Q96G03	Phosphoglucomutase-2 (PGM 2) (EC 5.4.2.2) (Glucose phosphomutase 2) (Phosphodeoxyribomutase) (Phosphopentomutase) (EC 5.4.2.7)	PGM2 MSTP006	PGM2_HUMAN	PGM2	-1.12025		0.0778904	0.595488	-0.553414	-0.687689	0.0119566		-0.0549729
P14618	Pyruvate kinase PKM (EC 2.7.1.40) (Cytosolic thyroid hormone-binding protein) (CTHBP) (Opa-interacting protein 3) (OIP-3) (Pyruvate kinase 2/3) (Pyruvate kinase muscle isozyme) (Thyroid hormone-binding protein 1) (THBP1) (Tumor M2-PK) (p58)	PKM OIP3 PK2 PK3 PKM2	KPYM_HUMAN	PKM	1.38357	0.310181	0.0886106	-0.343706	0.656234	1.33869	-0.0613161	-0.07806	0.375204
P00750	Tissue-type plasminogen activator (t-PA) (t-plasminogen activator) (tPA) (EC 3.4.21.68) (Alteplase) (Reteplase) [Cleaved into: Tissue-type plasminogen activator chain A; Tissue-type plasminogen activator chain B]	PLAT	TPA_HUMAN	PLAT		-0.45665		1.45498				-0.092331
P00749	Urokinase-type plasminogen activator (U-plasminogen activator) (uPA) (EC 3.4.21.73) [Cleaved into: Urokinase-type plasminogen activator long chain A; Urokinase-type plasminogen activator short chain A; Urokinase-type plasminogen activator chain B]	PLAU	UROK_HUMAN	PLAU	0.616033	0.394095	0.990207	-0.719584	-0.460045	0.656427	0.244792	-0.186428	0.267301
Q15181	Inorganic pyrophosphatase (EC 3.6.1.1) (Pyrophosphate phospho-hydrolase) (PPase)	PPA1 IOPPP PP	IPYR_HUMAN	PPA1	1.34991				0.69441	0.723017	-0.0918505	-0.261705	-0.0343676
P30405	Peptidyl-prolyl cis-trans isomerase F, mitochondrial (PPIase F) (EC 5.2.1.8) (Cyclophilin D) (CyP-D) (CypD) (Cyclophilin F) (Mitochondrial cyclophilin) (CyP-M) (Rotamase F)	PPIF CYP3	PPIF_HUMAN	PPIF	0.363464	0.578133			1.10439	0.157051			-0.335266
P42785	Lysosomal Pro-X carboxypeptidase (EC 3.4.16.2) (Angiotensinase C) (Lysosomal carboxypeptidase C) (Proline carboxypeptidase) (Prolylcarboxypeptidase) (PRCP)	PRCP PCP	PCP_HUMAN	PRCP	1.24061	-0.770236	-0.0947903	-0.165087		-0.846808	0.812466	-0.196557	0.183292
Q9GZN4	Brain-specific serine protease 4 (BSSP-4) (EC 3.4.21.-) (Serine protease 22) (Serine protease 26) (Tryptase epsilon)	PRSS22 BSSP4 PRSS26 SP001LA UNQ302/PRO343	BSSP4_HUMAN	PRSS22	-1.76797	-0.235585	0.574872	-0.152892	-0.672314	0.568899	0.486763	-0.26899	0.261758
P07602	Prosaposin (Proactivator polypeptide) [Cleaved into: Saposin-A (Protein A); Saposin-B-Val; Saposin-B (Cerebroside sulfate activator) (CSAct) (Dispersin) (Sphingolipid activator protein 1) (SAP-1) (Sulfatide/GM1 activator); Saposin-C (A1 activator) (Co-beta-glucosidase) (Glucosylceramidase activator) (Sphingolipid activator protein 2) (SAP-2); Saposin-D (Component C) (Protein C)]	PSAP GLBA SAP1	SAP_HUMAN	PSAP	-0.892521	-0.345017	-0.799833	0.146454	-1.24407	-1.1729	0.165622	-0.0861976	0.237957
P40306	Proteasome subunit beta type-10 (EC 3.4.25.1) (Low molecular mass protein 10) (Macropain subunit MECl-1) (Multicatalytic endopeptidase complex subunit MECl-1) (Proteasome MECl-1) (Proteasome subunit beta-2i)	PSMB10 LMP10 MECL1	PSB10_HUMAN	PSMB10	-1.38871					-0.411846	-0.344124		-0.210786
P28065	Proteasome subunit beta type-9 (EC 3.4.25.1) (Low molecular mass protein 2) (Macropain chain 7) (Multicatalytic endopeptidase complex chain 7) (Proteasome chain 7) (Proteasome subunit beta-1i) (Really interesting new gene 12 protein)	PSMB9 LMP2 PSMB6i RING12	PSB9_HUMAN	PSMB9	-1.05649	-0.77192	-0.222718	0.0838204	-0.357798	-0.114665	-0.260318		-0.0693991
Q15185	Prostaglandin E synthase 3 (EC 5.3.99.3) (Cytosolic prostaglandin E2 synthase) (cPGES) (Hsp90 co-chaperone) (Progesterone receptor complex p23) (Telomerase-binding protein p23)	PTGES3 P23 TEBP	TEBP_HUMAN	PTGES3	1.6701	0.918822			1.51301
P62826	GTP-binding nuclear protein Ran (Androgen receptor-associated protein 24) (GTPase Ran) (Ras-like protein TC4) (Ras-related nuclear protein)	RAN ARA24 OK/SW-cl.81	RAN_HUMAN	RAN	1.74264	0.582847	0.367687	0.0680579	0.938949	1.25669	0.0800176	0.0262222	-0.172383
P43487	Ran-specific GTPase-activating protein (Ran-binding protein 1) (RanBP1)	RANBP1	RANG_HUMAN	RANBP1	0.984769	0.323759				0.910522			-0.0140523
P30050	60S ribosomal protein L12 (Large ribosomal subunit protein uL11)	RPL12	RL12_HUMAN	RPL12	1.08266	0.00913324	0.334297	-0.109094	0.568713	0.887481	0.168767	-0.0403252	0.247805
P05388	60S acidic ribosomal protein P0 (60S ribosomal protein L10E) (Large ribosomal subunit protein uL10)	RPLP0	RLA0_HUMAN	RPLP0	0.580589	-0.347167	-0.2641	-0.63784	-0.779265	0.899047	-0.463211	-0.312388	0.531948
P08865	40S ribosomal protein SA (37 kDa laminin receptor precursor) (37LRP) (37/67 kDa laminin receptor) (LRP/LR) (67 kDa laminin receptor) (67LR) (Colon carcinoma laminin-binding protein) (Laminin receptor 1) (LamR) (Laminin-binding protein precursor p40) (LBP/p40) (Multidrug resistance-associated protein MGr1-Ag) (NEM/1CHD4) (Small ribosomal subunit protein uS2)	RPSA LAMBR LAMR1	RSSA_HUMAN	RPSA	1.7702		-0.355363		0.304274	1.26634
P29034	Protein S100-A2 (CAN19) (Protein S-100L) (S100 calcium-binding protein A2)	S100A2 S100L	S10A2_HUMAN	S100A2	1.401	-0.538225	0.483905	-3.79035	-0.248653	-1.62977	0.162471
P06703	Protein S100-A6 (Calcyclin) (Growth factor-inducible protein 2A9) (MLN 4) (Prolactin receptor-associated protein) (PRA) (S100 calcium-binding protein A6)	S100A6 CACY	S10A6_HUMAN	S100A6	-0.682656	-0.313671	-0.926656	0.0139318	-0.152962	-0.363208	-0.0882797	-0.0789966	-0.0965541
P0DJI8	Serum amyloid A-1 protein (SAA) [Cleaved into: Amyloid protein A (Amyloid fibril protein AA); Serum amyloid protein A(2-104); Serum amyloid protein A(3-104); Serum amyloid protein A(2-103); Serum amyloid protein A(2-102); Serum amyloid protein A(4-101)]	SAA1	SAA1_HUMAN	SAA1	-4.62053		0.388171		-0.0416365	-0.771812
P0DJI9	Serum amyloid A-2 protein (SAA2)	SAA2	SAA2_HUMAN	SAA2	-4.64165		0.254878		-0.0567144	-0.849187	0.145491		-0.3475
Q9HB40	Retinoid-inducible serine carboxypeptidase (EC 3.4.16.-) (Serine carboxypeptidase 1)	SCPEP1 RISC SCP1 MSTP034 UNQ265/PRO302	RISC_HUMAN	SCPEP1	-1.37228		-0.203996		-1.78463	-0.590178	0.203682		0.697132
Q12765	Secernin-1	SCRN1 KIAA0193	SCRN1_HUMAN	SCRN1					-1.14933	-0.198275	-0.474451		0.0886179
P31431	Syndecan-4 (SYND4) (Amphiglycan) (Ryudocan core protein)	SDC4	SDC4_HUMAN	SDC4	-0.37105	-0.753505	-0.0117597	-1.18944	-0.118169	-0.460589	0.591246	-0.0695026	-0.0894515
P01009	Alpha-1-antitrypsin (Alpha-1 protease inhibitor) (Alpha-1-antiproteinase) (Serpin A1) [Cleaved into: Short peptide from AAT (SPAAT)]	SERPINA1 AAT PI PRO0684 PRO2209	A1AT_HUMAN	SERPINA1	-1.21782	0.186819	1.25473	-1.15752	1.7591	2.94934	0.550839	-0.0309305	0.396861
P01011	Alpha-1-antichymotrypsin (ACT) (Cell growth-inhibiting gene 24/25 protein) (Serpin A3) [Cleaved into: Alpha-1-antichymotrypsin His-Pro-less]	SERPINA3 AACT GIG24 GIG25	AACT_HUMAN	GIG25			2.62607			1.62891	-0.0174078
P30740	Leukocyte elastase inhibitor (LEI) (Monocyte/neutrophil elastase inhibitor) (EI) (M/NEI) (Peptidase inhibitor 2) (PI-2) (Serpin B1)	SERPINB1 ELANH2 MNEI PI2	ILEU_HUMAN	SERPINB1	-1.24263	-0.0963174	-0.173857	0.6465	0.16267	0.055916	-0.00814484	0.0466904	-0.16266
P34897	Serine hydroxymethyltransferase, mitochondrial (SHMT) (EC 2.1.2.1) (Glycine hydroxymethyltransferase) (Serine methylase)	SHMT2	GLYM_HUMAN	SHMT2				-0.800334	1.92335	2.02985
P03973	Antileukoproteinase (ALP) (BLPI) (HUSI-1) (Mucus proteinase inhibitor) (MPI) (Protease inhibitor WAP4) (Secretory leukocyte protease inhibitor) (Seminal proteinase inhibitor) (WAP four-disulfide core domain protein 4)	SLPI WAP4 WFDC4	SLPI_HUMAN	SLPI	-2.09407	-1.41396	0.295495	1.07377	-0.688279	-1.01896	0.146289	0.0552524	-0.173696
Q92484	Acid sphingomyelinase-like phosphodiesterase 3a (ASM-like phosphodiesterase 3a) (EC 3.1.4.-)	SMPDL3A ASML3A	ASM3A_HUMAN	SMPDL3A	-1.49191				-1.31925	-1.16584	0.612189		0.195992
P04179	Superoxide dismutase [Mn], mitochondrial (EC 1.15.1.1)	SOD2	SODM_HUMAN	SOD2	-1.39451	-0.158675	0.873016	0.209013	0.942822	-0.542944	-0.0751998	0.170073	-0.531125
P09486	SPARC (Basement-membrane protein 40) (BM-40) (Osteonectin) (ON) (Secreted protein acidic and rich in cysteine)	SPARC ON	SPRC_HUMAN	SPARC	-0.939876	-1.18808	-0.312862	1.10056	-0.785916	-0.58968	0.655427	0.0215693	0.225196
O76061	Stanniocalcin-2 (STC-2) (Stanniocalcin-related protein) (STC-related protein) (STCRP)	STC2	STC2_HUMAN	STC2	0.336219	0.282635		1.17194	1.97382	1.45115	0.594758
P31948	Stress-induced-phosphoprotein 1 (STI1) (Hsc70/Hsp90-organizing protein) (Hop) (Renal carcinoma antigen NY-REN-11) (Transformation-sensitive protein IEF SSP 3521)	STIP1	STIP1_HUMAN	STIP1	1.01163	0.505524			0.505174	0.815125	-0.356956
P63165	Small ubiquitin-related modifier 1 (SUMO-1) (GAP-modifying protein 1) (GMP1) (SMT3 homolog 3) (Sentrin) (Ubiquitin-homology domain protein PIC1) (Ubiquitin-like protein SMT3C) (Smt3C) (Ubiquitin-like protein UBL1)	SUMO1 SMT3C SMT3H3 UBL1 OK/SW-cl.43	SUMO1_HUMAN	SUMO1	-0.8934
P37837	Transaldolase (EC 2.2.1.2)	TALDO1 TAL TALDO TALDOR	TALDO_HUMAN	TALDO1	-1.43576	0.201603	-0.0359345	-1.07127	-0.231791	-0.179625	0.0267643	0.082035	-0.216191
P17987	T-complex protein 1 subunit alpha (TCP-1-alpha) (CCT-alpha)	TCP1 CCT1 CCTA	TCPA_HUMAN	TCP1	0.968729		-0.140808	0.0775652	0.14664		-0.167169
P02786	Transferrin receptor protein 1 (TR) (TfR) (TfR1) (Trfr) (T9) (p90) (CD antigen CD71) [Cleaved into: Transferrin receptor protein 1, serum form (sTfR)]	TFRC	TFR1_HUMAN	TFRC			2.16182
Q15582	Transforming growth factor-beta-induced protein ig-h3 (Beta ig-h3) (Kerato-epithelin) (RGD-containing collagen-associated protein) (RGD-CAP)	TGFBI BIGH3	BGH3_HUMAN	TGFBI	-0.29221	-1.00862	1.25101	-0.200711	0.737858	0.593202	0.583019	-0.0882392	0.218057
P07996	Thrombospondin-1	THBS1 TSP TSP1	TSP1_HUMAN	THBS1	0.153896	-2.06797	-1.54506	-2.52795	-1.14373	-2.01896	0.56523	0.14489	0.470798
P35442	Thrombospondin-2	THBS2 TSP2	TSP2_HUMAN	THBS2		-1.78838	0.531333	-2.38128	-0.261073	-0.919026	0.627127	0.121979
P01033	Metalloproteinase inhibitor 1 (Erythroid-potentiating activity) (EPA) (Fibroblast collagenase inhibitor) (Collagenase inhibitor) (Tissue inhibitor of metalloproteinases 1) (TIMP-1)	TIMP1 CLGI TIMP	TIMP1_HUMAN	TIMP1	0.575303	0.101367	0.436176	-0.319315	1.14664	1.54927	0.456202	-0.197235	0.116988
P16035	Metalloproteinase inhibitor 2 (CSC-21K) (Tissue inhibitor of metalloproteinases 2) (TIMP-2)	TIMP2	TIMP2_HUMAN	TIMP2	-1.00712	-0.375414	-0.0683146	-0.241959	-0.185736	-0.479128	0.53995	-0.165884	0.174911
Q9GZM7	Tubulointerstitial nephritis antigen-like (Glucocorticoid-inducible protein 5) (Oxidized LDL-responsive gene 2 protein) (OLRG-2) (Tubulointerstitial nephritis antigen-related protein) (TIN Ag-related protein) (TIN-Ag-RP)	TINAGL1 GIS5 LCN7 OLRG2 TINAGL PP6614 PSEC0088 UNQ204/PRO230	TINAL_HUMAN	TINAGL1	0.249928	-0.203256	0.454422	-1.56116	-0.38492	0.556592	0.752944	-0.194526	0.249206
P24821	Tenascin (TN) (Cytotactin) (GMEM) (GP 150-225) (Glioma-associated-extracellular matrix antigen) (Hexabrachion) (JI) (Myotendinous antigen) (Neuronectin) (Tenascin-C) (TN-C)	TNC HXB	TENA_HUMAN	TNC	1.45554		1.2776		0.673119	1.63158
O14773	Tripeptidyl-peptidase 1 (TPP-1) (EC 3.4.14.9) (Cell growth-inhibiting gene 1 protein) (Lysosomal pepstatin-insensitive protease) (LPIC) (Tripeptidyl aminopeptidase) (Tripeptidyl-peptidase I) (TPP-I)	TPP1 CLN2 GIG1 UNQ267/PRO304	TPP1_HUMAN	TPP1	-1.29356	-0.124468	-0.241266	-1.39984	-0.582511	-0.555762	0.304342	-0.101818	0.124795
P13693	Translationally-controlled tumor protein (TCTP) (Fortilin) (Histamine-releasing factor) (HRF) (p23)	TPT1	TCTP_HUMAN	TPT1	1.18685	0.296474	0.344116	0.431785	0.73964	0.87492	0.211022	0.00781391	-0.0681769
P22314	Ubiquitin-like modifier-activating enzyme 1 (EC 6.2.1.45) (Protein A1S9) (Ubiquitin-activating enzyme E1)	UBA1 A1S9T UBE1	UBA1_HUMAN	UBA1	1.16097	0.298767	0.123889	-0.2531	0.379358	0.821685	-0.141039	-0.200459	0.13089
P09936	Ubiquitin carboxyl-terminal hydrolase isozyme L1 (UCH-L1) (EC 3.4.19.12) (EC 6.-.-.-) (Neuron cytoplasmic protein 9.5) (PGP 9.5) (PGP9.5) (Ubiquitin thioesterase L1)	UCHL1	UCHL1_HUMAN	UCHL1	2.05444	0.691576	1.5689	1.34361	1.33996	0.99005		-0.258695	0.0623921
P23381	Tryptophan--tRNA ligase, cytoplasmic (EC 6.1.1.2) (Interferon-induced protein 53) (IFP53) (Tryptophanyl-tRNA synthetase) (TrpRS) (hWRS) [Cleaved into: T1-TrpRS; T2-TrpRS]	WARS IFI53 WRS	SYWC_HUMAN	WARS	-0.704866		-0.973276		-0.984323	-0.321309	-0.493714		0.218057
* Gene names used in figure 1
