# Supplementary material for: Oncogenic KRAS-Induced Protein Signature in the Tumor Secretome Identifies Laminin-C2 and Pentraxin-3 as Useful Biomarkers for the Early Diagnosis of Pancreatic Cancer
Source: Cancers (Basel). 2022 May 27;14(11):2653. doi: 10.3390/cancers14112653 (PMC9179463; doi:10.3390/cancers14112653)
Supplement: Supplementary file 1 [file cancers-14-02653-s001.zip › Suppl Table S1.xlsx]

## Sheet: Foglio1
List of the 600 proteins identified by SILAC-MS by at least two peptides in six KRAS-Clones and in three Mock samples
Entry	Gene names	Protein names	Entry name	Clone 38	Clone 21	Clone 30	Clone 19	Clone 36	Clone 7	Mock 1	Mock 2	Mock 3
P61604	HSPE1	10 kDa heat shock protein, mitochondrial (Hsp10) (10 kDa chaperonin) (Chaperonin 10) (CPN10) (Early-pregnancy factor) (EPF)	CH10_HUMAN	0.368363	0.345001	0.355256	-0.460567	0.565702	-0.136479	-0.152572	0.0114851	-0.330234
P31946	YWHAB	14-3-3 protein beta/alpha (Protein 1054) (Protein kinase C inhibitor protein 1) (KCIP-1) [Cleaved into: 14-3-3 protein beta/alpha, N-terminally processed]	1433B_HUMAN	-0.0208249	0.00492508	-0.236032	0.0759607	0.0508414	-0.141028	0.0436502	0.0495501	-0.056184
P62258	YWHAE	14-3-3 protein epsilon (14-3-3E)	1433E_HUMAN	0.099988	0.0841839	-0.183094	0.0897595	0.161341	0.00198172	-0.0350281	0.0792391	-0.0207923
Q04917	YWHAH YWHA1	14-3-3 protein eta (Protein AS1)	1433F_HUMAN	0.160971	0.0627508	-0.13495	0.112705	0.109907	-0.0320835	0.0156291	0.132806	-0.0532445
P61981	YWHAG	14-3-3 protein gamma (Protein kinase C inhibitor protein 1) (KCIP-1) [Cleaved into: 14-3-3 protein gamma, N-terminally processed]	1433G_HUMAN	-0.0274049	-0.0205849	-0.157139	-0.0209191	-0.0149472	-0.0843882	0.0260709	0.0566745	-0.0532445
P31947	SFN HME1	14-3-3 protein sigma (Epithelial cell marker protein 1) (Stratifin)	1433S_HUMAN	0.584805	-0.107208	-0.467685	0.235388	-0.0542419	-0.296741	-0.0260113	0.0806377	-0.131324
P27348	YWHAQ	14-3-3 protein theta (14-3-3 protein T-cell) (14-3-3 protein tau) (Protein HS1)	1433T_HUMAN	0.116533	0.0788554	-0.152792	0.101278	0.0192027	-0.0344511	0.0156291	0.083431	-0.0523811
P63104	YWHAZ	14-3-3 protein zeta/delta (Protein kinase C inhibitor protein 1) (KCIP-1)	1433Z_HUMAN	0.00943867	0.0586963	-0.297732	-0.0571128	-0.088932	-0.117172	0.0364376	0.0174856	-0.0468674
O43598	DNPH1 C6orf108 RCL	2'-deoxynucleoside 5'-phosphate N-hydrolase 1 (EC 3.2.2.-) (c-Myc-responsive protein RCL)	DNPH1_HUMAN		0.323759
P31937	HIBADH	3-hydroxyisobutyrate dehydrogenase, mitochondrial (HIBADH) (EC 1.1.1.31)	3HIDH_HUMAN		0.586606
P25398	RPS12	40S ribosomal protein S12 (Small ribosomal subunit protein eS12)	RS12_HUMAN	0.44688
P62857	RPS28	40S ribosomal protein S28 (Small ribosomal subunit protein eS28)	RS28_HUMAN	0.0670712					0.0647912
P23396	RPS3 OK/SW-cl.26	40S ribosomal protein S3 (EC 4.2.99.18) (Small ribosomal subunit protein uS3)	RS3_HUMAN		-0.335026	-0.20768
P08865	RPSA LAMBR LAMR1	40S ribosomal protein SA (37 kDa laminin receptor precursor) (37LRP) (37/67 kDa laminin receptor) (LRP/LR) (67 kDa laminin receptor) (67LR) (Colon carcinoma laminin-binding protein) (Laminin receptor 1) (LamR) (Laminin-binding protein precursor p40) (LBP/p40) (Multidrug resistance-associated protein MGr1-Ag) (NEM/1CHD4) (Small ribosomal subunit protein uS2)	RSSA_HUMAN	1.7702		-0.355363		0.304274	1.26634
Q9BRK5	SDF4 CAB45 PSEC0034	45 kDa calcium-binding protein (Cab45) (Stromal cell-derived factor 4) (SDF-4)	CAB45_HUMAN		-0.140537		0.210343					0.020661
P08195	SLC3A2 MDU1	4F2 cell-surface antigen heavy chain (4F2hc) (4F2 heavy chain antigen) (Lymphocyte activation antigen 4F2 large subunit) (Solute carrier family 3 member 2) (CD antigen CD98)	4F2_HUMAN			-0.137486
Q5TFE4	NT5DC1 NT5C2L1 LP2642	5'-nucleotidase domain-containing protein 1 (EC 3.1.3.-)	NT5D1_HUMAN	-0.206123			0.183501	0.44309	0.362019			-0.135158
P10809	HSPD1 HSP60	60 kDa heat shock protein, mitochondrial (EC 3.6.4.9) (60 kDa chaperonin) (Chaperonin 60) (CPN60) (Heat shock protein 60) (HSP-60) (Hsp60) (HuCHA60) (Mitochondrial matrix protein P1) (P60 lymphocyte protein)	CH60_HUMAN	1.22314		-0.277588	-0.418632	0.448549	1.90876	-0.337416		-0.136255
P10155	TROVE2 RO60 SSA2	60 kDa SS-A/Ro ribonucleoprotein (60 kDa Ro protein) (60 kDa ribonucleoprotein Ro) (RoRNP) (Ro 60 kDa autoantigen) (Sjoegren syndrome antigen A2) (Sjoegren syndrome type A antigen) (SS-A) (TROVE domain family member 2)	RO60_HUMAN	-0.648609		-0.253695		-0.616989	-0.0298885			-0.18236
P05388	RPLP0	60S acidic ribosomal protein P0 (60S ribosomal protein L10E) (Large ribosomal subunit protein uL10)	RLA0_HUMAN	0.580589	-0.347167	-0.2641	-0.63784	-0.779265	0.899047	-0.463211	-0.312388	0.531948
P05387	RPLP2 D11S2243E RPP2	60S acidic ribosomal protein P2 (Large ribosomal subunit protein P2) (Renal carcinoma antigen NY-REN-44)	RLA2_HUMAN			-0.0889276			0.485191
P62906	RPL10A NEDD6	60S ribosomal protein L10a (CSA-19) (Large ribosomal subunit protein uL1) (Neural precursor cell expressed developmentally down-regulated protein 6) (NEDD-6)	RL10A_HUMAN			0.0740183				-0.411334
P30050	RPL12	60S ribosomal protein L12 (Large ribosomal subunit protein uL11)	RL12_HUMAN	1.08266	0.00913324	0.334297	-0.109094	0.568713	0.887481	0.168767	-0.0403252	0.247805
P35268	RPL22	60S ribosomal protein L22 (EBER-associated protein) (EAP) (Epstein-Barr virus small RNA-associated protein) (Heparin-binding protein HBp15) (Large ribosomal subunit protein eL22)	RL22_HUMAN		0.576244			0.214853
P62888	RPL30	60S ribosomal protein L30 (Large ribosomal subunit protein eL30)	RL30_HUMAN					-0.0355273
P46777	RPL5 MSTP030	60S ribosomal protein L5 (Large ribosomal subunit protein uL18)	RL5_HUMAN				0.293027
P52209	PGD PGDH	6-phosphogluconate dehydrogenase, decarboxylating (EC 1.1.1.44)	6PGD_HUMAN	0.726034		0.424324	0.342397	0.233945	0.869503	-0.402906
O95336	PGLS	6-phosphogluconolactonase (6PGL) (EC 3.1.1.31)	6PGL_HUMAN	-0.0422798
P11021	HSPA5 GRP78	78 kDa glucose-regulated protein (GRP-78) (Endoplasmic reticulum lumenal Ca(2+)-binding protein grp78) (Heat shock 70 kDa protein 5) (Immunoglobulin heavy chain-binding protein) (BiP)	GRP78_HUMAN	0.388999	0.488545	0.325827	0.239303	-0.23249	0.347805	-0.135598	0.256763	-0.20713
Q9BWD1	ACAT2 ACTL	Acetyl-CoA acetyltransferase, cytosolic (EC 2.3.1.9) (Acetyl-CoA transferase-like protein) (Cytosolic acetoacetyl-CoA thiolase)	THIC_HUMAN	1.49359					0.50745
Q92484	SMPDL3A ASML3A	Acid sphingomyelinase-like phosphodiesterase 3a (ASM-like phosphodiesterase 3a) (EC 3.1.4.-)	ASM3A_HUMAN	-1.49191				-1.31925	-1.16584	0.612189		0.195992
P39687	ANP32A C15orf1 LANP MAPM PHAP1	Acidic leucine-rich nuclear phosphoprotein 32 family member A (Acidic nuclear phosphoprotein pp32) (pp32) (Leucine-rich acidic nuclear protein) (LANP) (Mapmodulin) (Potent heat-stable protein phosphatase 2A inhibitor I1PP2A) (Putative HLA-DR-associated protein I) (PHAPI)	AN32A_HUMAN	-0.405338	0.0532727	0.121933	0.176712	-0.237916	-0.00662548	-0.0997753	0.0366367	-0.0714968
Q92688	ANP32B APRIL PHAPI2	Acidic leucine-rich nuclear phosphoprotein 32 family member B (Acidic protein rich in leucines) (Putative HLA-DR-associated protein I-2) (PHAPI2) (Silver-stainable protein SSP29)	AN32B_HUMAN	0.133898	-0.0120314	0.0662428	0.0798959	0.585656	-0.0926468	-0.000353169	0.101456	-0.193168
P60709	ACTB	Actin, cytoplasmic 1 (Beta-actin) [Cleaved into: Actin, cytoplasmic 1, N-terminally processed]	ACTB_HUMAN	1.13892	-0.000704957	-0.198487	-0.677641	0.345819	0.798118	-0.0303323	-0.0448931	0.235131
O15144	ARPC2 ARC34 PRO2446	Actin-related protein 2/3 complex subunit 2 (Arp2/3 complex 34 kDa subunit) (p34-ARC)	ARPC2_HUMAN					-0.170092
P61158	ACTR3 ARP3	Actin-related protein 3 (Actin-like protein 3)	ARP3_HUMAN			-0.142374		-0.299171
P13798	APEH D3F15S2 D3S48E DNF15S2	Acylamino-acid-releasing enzyme (AARE) (EC 3.4.19.1) (Acyl-peptide hydrolase) (APH) (Acylaminoacyl-peptidase) (Oxidized protein hydrolase) (OPH)	ACPH_HUMAN						-0.0564513
P07108	DBI	Acyl-CoA-binding protein (ACBP) (Diazepam-binding inhibitor) (DBI) (Endozepine) (EP)	ACBP_HUMAN				-0.0366127
P00813	ADA ADA1	Adenosine deaminase (EC 3.5.4.4) (Adenosine aminohydrolase)	ADA_HUMAN	-1.54021		-0.340233		-0.325576	-0.674705	-0.0138381	0.0288329	0.0489373
P23526	AHCY SAHH	Adenosylhomocysteinase (AdoHcyase) (EC 3.3.1.1) (S-adenosyl-L-homocysteine hydrolase)	SAHH_HUMAN	2.09305	1.01403	0.803547	0.0183435	0.720816	1.5943	-0.0587392	-0.187606	-0.120425
P54819	AK2 ADK2	Adenylate kinase 2, mitochondrial (AK 2) (EC 2.7.4.3) (ATP-AMP transphosphorylase 2) (ATP:AMP phosphotransferase) (Adenylate monophosphate kinase) [Cleaved into: Adenylate kinase 2, mitochondrial, N-terminally processed]	KAD2_HUMAN	-0.222051	-0.279393	-0.188342	0.0969694	0.346988	-0.293294	-0.0567177	0.124693	-0.360479
Q01518	CAP1 CAP	Adenylyl cyclase-associated protein 1 (CAP 1)	CAP1_HUMAN	0.95902	-0.0654572	0.00619753	0.187559	0.905998		-0.0191959	0.0722255
Q86SQ4	ADGRG6 DREG GPR126 VIGR	Adhesion G-protein coupled receptor G6 (Developmentally regulated G-protein-coupled receptor) (G-protein coupled receptor 126) (Vascular inducible G protein-coupled receptor) [Cleaved into: ADGRG6 N-terminal fragment (ADGRG6-NTF); ADGRG6 C-terminal fragment (ADGRG6-CTF)]	AGRG6_HUMAN	-1.45813	-0.695743	-0.837072	-0.577138		-1.62467	0.384976		0.256193
O00468	AGRN AGRIN	Agrin [Cleaved into: Agrin N-terminal 110 kDa subunit; Agrin C-terminal 110 kDa subunit; Agrin C-terminal 90 kDa fragment (C90); Agrin C-terminal 22 kDa fragment (C22)]	AGRIN_HUMAN	-0.642683	-0.300244	0.208023	-0.175474	-1.04654	-0.0845634	0.591246	-0.106108	0.247805
P49588	AARS	Alanine--tRNA ligase, cytoplasmic (EC 6.1.1.7) (Alanyl-tRNA synthetase) (AlaRS) (Renal carcinoma antigen NY-REN-42)	SYAC_HUMAN	1.62169				0.479808	1.57723			0.395596
P14550	AKR1A1 ALDR1 ALR	Alcohol dehydrogenase [NADP(+)] (EC 1.1.1.2) (Aldehyde reductase) (Aldo-keto reductase family 1 member A1)	AK1A1_HUMAN	-0.467702	0.0216846	-0.368591	-0.0606382		-0.245492		-0.0249017	0.00183009
P15121	AKR1B1 ALDR1	Aldose reductase (AR) (EC 1.1.1.21) (Aldehyde reductase) (Aldo-keto reductase family 1 member B1)	ALDR_HUMAN	0.438752	0.531111	0.284319			0.415037			-0.133514
P01011	SERPINA3 AACT GIG24 GIG25	Alpha-1-antichymotrypsin (ACT) (Cell growth-inhibiting gene 24/25 protein) (Serpin A3) [Cleaved into: Alpha-1-antichymotrypsin His-Pro-less]	AACT_HUMAN			2.62607			1.62891	-0.0174078
P01009	SERPINA1 AAT PI PRO0684 PRO2209	Alpha-1-antitrypsin (Alpha-1 protease inhibitor) (Alpha-1-antiproteinase) (Serpin A1) [Cleaved into: Short peptide from AAT (SPAAT)]	A1AT_HUMAN	-1.21782	0.186819	1.25473	-1.15752	1.7591	2.94934	0.550839	-0.0309305	0.396861
P12814	ACTN1	Alpha-actinin-1 (Alpha-actinin cytoskeletal isoform) (F-actin cross-linking protein) (Non-muscle alpha-actinin-1)	ACTN1_HUMAN	0.114202	-0.0471366	-0.284488	-0.2185	0.0522762	-0.0121145	0.108138	0.138189	0.183878
O43707	ACTN4	Alpha-actinin-4 (Non-muscle alpha-actinin 4)	ACTN4_HUMAN	-0.0512462	-0.0756708	-0.31551	-0.139104	-0.0519278	-0.0807134	0.0632165	0.11107	0.128912
P61163	ACTR1A CTRN1	Alpha-centractin (Centractin) (ARP1) (Actin-RPV) (Centrosome-associated actin homolog)	ACTZ_HUMAN		0.596894					-0.12074
P06733	ENO1 ENO1L1 MBPB1 MPB1	Alpha-enolase (EC 4.2.1.11) (2-phospho-D-glycerate hydro-lyase) (C-myc promoter-binding protein) (Enolase 1) (MBP-1) (MPB-1) (Non-neural enolase) (NNE) (Phosphopyruvate hydratase) (Plasminogen-binding protein)	ENOA_HUMAN	0.590057	0.304485	0.110637	0.42378	0.514573	0.290858	0.0610179	-0.0239995	-0.131871
Q9H4A4	RNPEP APB	Aminopeptidase B (AP-B) (EC 3.4.11.6) (Arginine aminopeptidase) (Arginyl aminopeptidase)	AMPB_HUMAN					-0.346788		-0.131724
P05067	APP A4 AD1	Amyloid beta A4 protein (ABPP) (APPI) (APP) (Alzheimer disease amyloid protein) (Amyloid precursor protein) (Beta-amyloid precursor protein) (Cerebral vascular amyloid peptide) (CVAP) (PreA4) (Protease nexin-II) (PN-II) [Cleaved into: N-APP; Soluble APP-alpha (S-APP-alpha); Soluble APP-beta (S-APP-beta); C99; Beta-amyloid protein 42 (Beta-APP42); Beta-amyloid protein 40 (Beta-APP40); C83; P3(42);…	A4_HUMAN	-0.347565	-0.252613	0.255622	-0.451913	0.265214	-0.271786	0.438071	-0.227897	0.0951785
Q06481	APLP2 APPL2	Amyloid-like protein 2 (APLP-2) (APPH) (Amyloid protein homolog) (CDEI box-binding protein) (CDEBP)	APLP2_HUMAN	0.205451	0.227117	0.717672	-0.00817655	0.444184	0.0811303	0.424979	-0.255338	0.0510279
P04083	ANXA1 ANX1 LPC1	Annexin A1 (Annexin I) (Annexin-1) (Calpactin II) (Calpactin-2) (Chromobindin-9) (Lipocortin I) (Phospholipase A2 inhibitory protein) (p35)	ANXA1_HUMAN	-0.297243	-0.199043	-0.217963	-0.3247	-0.303936	-0.253153	-0.0837818	-0.134225	-0.0681769
P07355	ANXA2 ANX2 ANX2L4 CAL1H LPC2D	Annexin A2 (Annexin II) (Annexin-2) (Calpactin I heavy chain) (Calpactin-1 heavy chain) (Chromobindin-8) (Lipocortin II) (Placental anticoagulant protein IV) (PAP-IV) (Protein I) (p36)	ANXA2_HUMAN		-0.0996364	-0.452307	-0.195769	-0.148175	-0.179251	0.0801847	0.0204037	0.147518
P12429	ANXA3 ANX3	Annexin A3 (35-alpha calcimedin) (Annexin III) (Annexin-3) (Inositol 1,2-cyclic phosphate 2-phosphohydrolase) (Lipocortin III) (Placental anticoagulant protein III) (PAP-III)	ANXA3_HUMAN		0.254552			0.451814		0.332658	0.0538289
P08758	ANXA5 ANX5 ENX2 PP4	Annexin A5 (Anchorin CII) (Annexin V) (Annexin-5) (Calphobindin I) (CBP-I) (Endonexin II) (Lipocortin V) (Placental anticoagulant protein 4) (PP4) (Placental anticoagulant protein I) (PAP-I) (Thromboplastin inhibitor) (Vascular anticoagulant-alpha) (VAC-alpha)	ANXA5_HUMAN		0.361552	0.0388664	1.0635			0.175193	0.216615
P13928	ANXA8 ANX8	Annexin A8 (Annexin VIII) (Annexin-8) (Vascular anticoagulant-beta) (VAC-beta)	ANXA8_HUMAN		-0.528637		-0.469485	-0.784379		0.102558	0.0380773	0.0733512
Q5VT79	ANXA8L1 ANXA8L2	Annexin A8-like protein 1	AXA81_HUMAN	-0.0944042		-0.957683	-0.446662		-0.356845	0.106171	0.0380773	0.0690728
P03973	SLPI WAP4 WFDC4	Antileukoproteinase (ALP) (BLPI) (HUSI-1) (Mucus proteinase inhibitor) (MPI) (Protease inhibitor WAP4) (Secretory leukocyte protease inhibitor) (Seminal proteinase inhibitor) (WAP four-disulfide core domain protein 4)	SLPI_HUMAN	-2.09407	-1.41396	0.295495	1.07377	-0.688279	-1.01896	0.146289	0.0552524	-0.173696
P17174	GOT1	Aspartate aminotransferase, cytoplasmic (cAspAT) (EC 2.6.1.1) (EC 2.6.1.3) (Cysteine aminotransferase, cytoplasmic) (Cysteine transaminase, cytoplasmic) (cCAT) (Glutamate oxaloacetate transaminase 1) (Transaminase A)	AATC_HUMAN	0.635467	0.450885	0.063868	0.055826	0.439805	0.43351	0.106335	0.147561	-0.0128761
P00505	GOT2	Aspartate aminotransferase, mitochondrial (mAspAT) (EC 2.6.1.1) (EC 2.6.1.7) (Fatty acid-binding protein) (FABP-1) (Glutamate oxaloacetate transaminase 2) (Kynurenine aminotransferase 4) (Kynurenine aminotransferase IV) (Kynurenine--oxoglutarate transaminase 4) (Kynurenine--oxoglutarate transaminase IV) (Plasma membrane-associated fatty acid-binding protein) (FABPpm) (Transaminase A)	AATM_HUMAN	0.259189	0.156788	0.146349	-0.238688	0.352822	-0.192976	-0.00992156	0.0217149	-0.369699
Q9ULA0	DNPEP ASPEP DAP	Aspartyl aminopeptidase (EC 3.4.11.21)	DNPEP_HUMAN			0.0854364		0.135853	-0.388295
P53396	ACLY	ATP-citrate synthase (EC 2.3.3.8) (ATP-citrate (pro-S-)-lyase) (ACL) (Citrate cleavage enzyme)	ACLY_HUMAN	0.121039	0.10268	-0.118675	-0.58404	-0.164248	0.338687	-0.175919	-0.130013	-0.0683514
Q08211	DHX9 DDX9 LKP NDH2	ATP-dependent RNA helicase A (RHA) (EC 3.6.4.13) (DEAH box protein 9) (Leukophysin) (LKP) (Nuclear DNA helicase II) (NDH II)	DHX9_HUMAN			0.415037		-0.83441
O75882	ATRN KIAA0548 MGCA	Attractin (DPPT-L) (Mahogany homolog)	ATRN_HUMAN	-1.17265	-0.588632	0.549634	-0.100162	-0.841854	-1.09353	0.730773	-0.158605	0.129673
O75531	BANF1 BAF BCRG1	Barrier-to-autointegration factor (Breakpoint cluster region protein 1) [Cleaved into: Barrier-to-autointegration factor, N-terminally processed]	BAF_HUMAN			0.190403		0.748518	0.365871	0.226045
P50895	BCAM LU MSK19	Basal cell adhesion molecule (Auberger B antigen) (B-CAM cell surface glycoprotein) (F8/G253 antigen) (Lutheran antigen) (Lutheran blood group glycoprotein) (CD antigen CD239)	BCAM_HUMAN	-2.19524	-1.23078	-1.34338	-0.732818	-1.76025	-2.48166	0.050486	0.0452585	-0.268773
P98160	HSPG2	Basement membrane-specific heparan sulfate proteoglycan core protein (HSPG) (Perlecan) (PLC) [Cleaved into: Endorepellin; LG3 peptide]	PGBM_HUMAN	-2.01986	-0.258671	0.289845	-0.712761	-1.35837	-0.607447	0.504296	-0.0997574	0.18666
P15291	B4GALT1 GGTB2	Beta-1,4-galactosyltransferase 1 (Beta-1,4-GalTase 1) (Beta4Gal-T1) (b4Gal-T1) (EC 2.4.1.-) (UDP-Gal:beta-GlcNAc beta-1,4-galactosyltransferase 1) (UDP-galactose:beta-N-acetylglucosamine beta-1,4-galactosyltransferase 1) [Cleaved into: Processed beta-1,4-galactosyltransferase 1] [Includes: Lactose synthase A protein (EC 2.4.1.22); N-acetyllactosamine synthase (EC 2.4.1.90) (Nal synthase); Beta-N-…	B4GT1_HUMAN						-0.343573			0.451449
P61769	B2M CDABP0092 HDCMA22P	Beta-2-microglobulin [Cleaved into: Beta-2-microglobulin form pI 5.3]	B2MG_HUMAN	-1.04212	-0.747103	0.0227118	0.183501	-0.583625	-0.387214	0.419709	-0.104995	0.137564
P06865	HEXA	Beta-hexosaminidase subunit alpha (EC 3.2.1.52) (Beta-N-acetylhexosaminidase subunit alpha) (Hexosaminidase subunit A) (N-acetyl-beta-glucosaminidase subunit alpha)	HEXA_HUMAN	-0.670799	-0.228136	-0.184304	-0.44981	-0.790539	-0.46857	0.37548	-0.166547	0.223771
P07686	HEXB HCC7	Beta-hexosaminidase subunit beta (EC 3.2.1.52) (Beta-N-acetylhexosaminidase subunit beta) (Hexosaminidase subunit B) (Cervical cancer proto-oncogene 7 protein) (HCC-7) (N-acetyl-beta-glucosaminidase subunit beta) [Cleaved into: Beta-hexosaminidase subunit beta chain B; Beta-hexosaminidase subunit beta chain A]	HEXB_HUMAN	-0.193795	-0.0780495	0.0652255	-0.584963	-0.0677375	-0.185251	0.531424	-0.200799	0.213757
O00462	MANBA MANB1	Beta-mannosidase (EC 3.2.1.25) (Lysosomal beta A mannosidase) (Mannanase) (Mannase)	MANBA_HUMAN	-0.730038	-0.176406	0.0165849	-0.385698	-1.37795	-0.610723	0.462622	-0.322889	0.216626
P07814	EPRS GLNS PARS QARS QPRS PIG32	Bifunctional glutamate/proline--tRNA ligase (Bifunctional aminoacyl-tRNA synthetase) (Cell proliferation-inducing gene 32 protein) (Glutamatyl-prolyl-tRNA synthetase) [Includes: Glutamate--tRNA ligase (EC 6.1.1.17) (Glutamyl-tRNA synthetase) (GluRS); Proline--tRNA ligase (EC 6.1.1.15) (Prolyl-tRNA synthetase)]	SYEP_HUMAN	0.746875		0.231792		0.119521
P31939	ATIC PURH OK/SW-cl.86	Bifunctional purine biosynthesis protein PURH [Cleaved into: Bifunctional purine biosynthesis protein PURH, N-terminally processed] [Includes: Phosphoribosylaminoimidazolecarboxamide formyltransferase (EC 2.1.2.3) (5-aminoimidazole-4-carboxamide ribonucleotide formyltransferase) (AICAR transformylase); IMP cyclohydrolase (EC 3.5.4.10) (ATIC) (IMP synthase) (Inosinicase)]	PUR9_HUMAN	1.51859	0.483513		-0.574845	0.74586	1.61818	-0.342332
P19835	CEL BAL	Bile salt-activated lipase (BAL) (EC 3.1.1.13) (EC 3.1.1.3) (Bile salt-stimulated lipase) (BSSL) (Bucelipase) (Carboxyl ester lipase) (Cholesterol esterase) (Pancreatic lysophospholipase) (Sterol esterase)	CEL_HUMAN	-3.83261	-0.561543	-0.238961	0.354479	-2.50176	-3.12786	0.0309179		-0.195835
Q9GZN4	PRSS22 BSSP4 PRSS26 SP001LA UNQ302/PRO343	Brain-specific serine protease 4 (BSSP-4) (EC 3.4.21.-) (Serine protease 22) (Serine protease 26) (Tryptase epsilon)	BSSP4_HUMAN	-1.76797	-0.235585	0.574872	-0.152892	-0.672314	0.568899	0.486763	-0.26899	0.261758
O15382	BCAT2 BCATM BCT2 ECA40	Branched-chain-amino-acid aminotransferase, mitochondrial (BCAT(m)) (EC 2.6.1.42) (Placental protein 18) (PP18)	BCAT2_HUMAN						0.508612
P12830	CDH1 CDHE UVO	Cadherin-1 (CAM 120/80) (Epithelial cadherin) (E-cadherin) (Uvomorulin) (CD antigen CD324) [Cleaved into: E-Cad/CTF1; E-Cad/CTF2; E-Cad/CTF3]	CADH1_HUMAN	-0.60163	-0.410956	-0.0804594	-0.523745	-0.624076	-0.290866	0.122482	-0.0168025	-0.110685
Q9Y376	CAB39 MO25 CGI-66	Calcium-binding protein 39 (MO25alpha) (Protein Mo25)	CAB39_HUMAN	-0.621403	-0.272056	-0.051298		0.149324	-0.0746096	0.110102	0.0708187	-0.189367
P62158	CALM1 CALM CAM CAM1; CALM2 CAM2 CAMB; CALM3 CALML2 CAM3 CAMC CAMIII	Calmodulin (CaM)	CALM_HUMAN	-0.103871	0.122238	-0.181685	-0.0706201	0.170619	-0.123999	-0.0125907	0.170073	-0.0857367
P27824	CANX	Calnexin (IP90) (Major histocompatibility complex class I antigen-binding protein p88) (p90)	CALX_HUMAN			-0.323704		-0.78566		-0.0683338
P04632	CAPNS1 CAPN4 CAPNS	Calpain small subunit 1 (CSS1) (Calcium-activated neutral proteinase small subunit) (CANP small subunit) (Calcium-dependent protease small subunit) (CDPS) (Calcium-dependent protease small subunit 1) (Calpain regulatory subunit)	CPNS1_HUMAN						0.0965138			-0.166205
P07384	CAPN1 CANPL1 PIG30	Calpain-1 catalytic subunit (EC 3.4.22.52) (Calcium-activated neutral proteinase 1) (CANP 1) (Calpain mu-type) (Calpain-1 large subunit) (Cell proliferation-inducing gene 30 protein) (Micromolar-calpain) (muCANP)	CAN1_HUMAN	-0.211047	0.024459	-0.400325	-0.00338842	0.0410467	-0.276383	-0.0666687	-0.0283652	0.0804538
P27797	CALR CRTC	Calreticulin (CRP55) (Calregulin) (Endoplasmic reticulum resident protein 60) (ERp60) (HACBP) (grp60)	CALR_HUMAN	-0.731347	-0.345196	0.125841	0.171258	-0.629127	-0.356421	-0.0348472	0.30662	-0.118977
O94985	CLSTN1 CS1 KIAA0911	Calsyntenin-1 (Alcadein-alpha) (Alc-alpha) (Alzheimer-related cadherin-like protein) (Non-classical cadherin XB31alpha) [Cleaved into: Soluble Alc-alpha (SAlc-alpha); CTF1-alpha (C-terminal fragment 1-alpha)]	CSTN1_HUMAN	-0.335167	-0.456844	0.335703	-0.0826251	-0.575625	-0.0483968	0.500557	-0.0954865	0.243593
P00918	CA2	Carbonic anhydrase 2 (EC 4.2.1.1) (Carbonate dehydratase II) (Carbonic anhydrase C) (CAC) (Carbonic anhydrase II) (CA-II)	CAH2_HUMAN	-0.333575					0.180135			0.108211
P16152	CBR1 CBR CRN SDR21C1	Carbonyl reductase [NADPH] 1 (EC 1.1.1.184) (15-hydroxyprostaglandin dehydrogenase [NADP(+)]) (EC 1.1.1.197) (NADPH-dependent carbonyl reductase 1) (Prostaglandin 9-ketoreductase) (Prostaglandin-E(2) 9-reductase) (EC 1.1.1.189) (Short chain dehydrogenase/reductase family 21C member 1)	CBR1_HUMAN	-0.177997		-0.000532458	0.587319	-0.257513	-0.520962	0.00229349		-0.102976
Q96DG6	CMBL	Carboxymethylenebutenolidase homolog (EC 3.1.-.-)	CMBL_HUMAN				1.06424
Q9UI42	CPA4 CPA3 UNQ694/PRO1339	Carboxypeptidase A4 (EC 3.4.17.-) (Carboxypeptidase A3)	CBPA4_HUMAN	-1.60835	-1.05151	-0.770476	-1.27881	-1.7658	-2.56136	0.86963	0.00913661	0.325586
P16870	CPE	Carboxypeptidase E (CPE) (EC 3.4.17.10) (Carboxypeptidase H) (CPH) (Enkephalin convertase) (Prohormone-processing carboxypeptidase)	CBPE_HUMAN	-1.53015		-0.079709	0.666992	-2.38531	-0.0172899	0.0771752		0.289264
P35221	CTNNA1	Catenin alpha-1 (Alpha E-catenin) (Cadherin-associated protein) (Renal carcinoma antigen NY-REN-13)	CTNA1_HUMAN	-0.638254	0.0133292			-0.726151		-0.538147	-0.0321393
P35222	CTNNB1 CTNNB OK/SW-cl.35 PRO2286	Catenin beta-1 (Beta-catenin)	CTNB1_HUMAN					-0.862253
P07858	CTSB CPSB	Cathepsin B (EC 3.4.22.1) (APP secretase) (APPS) (Cathepsin B1) [Cleaved into: Cathepsin B light chain; Cathepsin B heavy chain]	CATB_HUMAN	-1.61076	-0.423378	-0.749441	0.444276	-0.72173	-0.818262	0.36455		0.091277
P07339	CTSD CPSD	Cathepsin D (EC 3.4.23.5) [Cleaved into: Cathepsin D light chain; Cathepsin D heavy chain]	CATD_HUMAN	-2.15111	-0.241572	-0.623811	-0.735377	-1.59841	-1.58695	0.146448	-0.190134	0.110834
P07711	CTSL CTSL1	Cathepsin L1 (EC 3.4.22.15) (Cathepsin L) (Major excreted protein) (MEP) [Cleaved into: Cathepsin L1 heavy chain; Cathepsin L1 light chain]	CATL1_HUMAN	0.652636	-0.000704957	-0.397284	-0.230543	0.18246	0.099756	0.253853	-0.108497	-0.0466954
O60911	CTSV CATL2 CTSL2 CTSU UNQ268/PRO305	Cathepsin L2 (EC 3.4.22.43) (Cathepsin U) (Cathepsin V)	CATL2_HUMAN	-1.15321	-1.48005	-0.22832	0.0251626	-1.14867	-1.45695	0.77478	-0.0344085	0.445349
Q9UBR2	CTSZ	Cathepsin Z (EC 3.4.18.1) (Cathepsin P) (Cathepsin X)	CATZ_HUMAN	0.0543601	0.10268	0.0303773	-0.419043	-0.100364	-0.153105	0.583019	-0.119697	0.291987
P11717	IGF2R MPRI	Cation-independent mannose-6-phosphate receptor (CI Man-6-P receptor) (CI-MPR) (M6PR) (300 kDa mannose 6-phosphate receptor) (MPR 300) (Insulin-like growth factor 2 receptor) (Insulin-like growth factor II receptor) (IGF-II receptor) (M6P/IGF2 receptor) (M6P/IGF2R) (CD antigen CD222)	MPRI_HUMAN						0.673106
Q6YHK3	CD109 CPAMD7	CD109 antigen (150 kDa TGF-beta-1-binding protein) (C3 and PZP-like alpha-2-macroglobulin domain-containing protein 7) (Platelet-specific Gov antigen) (p180) (r150) (CD antigen CD109)	CD109_HUMAN	-1.03208	-0.258166	-0.507997	-0.241959	-1.14933	-0.843245	0.193991	-0.106108	0.00929275
Q13740	ALCAM MEMD	CD166 antigen (Activated leukocyte cell adhesion molecule) (CD antigen CD166)	CD166_HUMAN	-0.195602	-0.108423	0.0837629	0.0761066	-0.228303	-0.120402	0.301479	-0.108656	0.0272106
P16070	CD44 LHR MDU2 MDU3 MIC4	CD44 antigen (CDw44) (Epican) (Extracellular matrix receptor III) (ECMR-III) (GP90 lymphocyte homing/adhesion receptor) (HUTCH-I) (Heparan sulfate proteoglycan) (Hermes antigen) (Hyaluronate receptor) (Phagocytic glycoprotein 1) (PGP-1) (Phagocytic glycoprotein I) (PGP-I) (CD antigen CD44)	CD44_HUMAN	0.869424	-0.0807303	-0.295117	-0.879632	0.438709	0.0923346	0.220752	-0.043826	-0.173133
P62633	CNBP RNF163 ZNF9	Cellular nucleic acid-binding protein (CNBP) (Zinc finger protein 9)	CNBP_HUMAN		-0.577862			0.122256	-0.300603	0.0436502	0
P29373	CRABP2	Cellular retinoic acid-binding protein 2 (Cellular retinoic acid-binding protein II) (CRABP-II)	RABP2_HUMAN	-1.28931	-0.0942093	-0.367675		-0.864688	-0.02736	-0.0832205		-0.18444
Q9BWS9	CHID1 GL008 PSEC0104 SB139	Chitinase domain-containing protein 1 (Stabilin-1-interacting chitinase-like protein) (SI-CLP)	CHID1_HUMAN			0.300115
O00299	CLIC1 G6 NCC27	Chloride intracellular channel protein 1 (Chloride channel ABP) (Nuclear chloride ion channel 27) (NCC27) (Regulatory nuclear chloride ion channel protein) (hRNCC)	CLIC1_HUMAN	0.818428	0.802413	0.40703	0.290513	0.685192	1.10668	-0.142403	-0.0554545	0.0358432
P83916	CBX1 CBX	Chromobox protein homolog 1 (HP1Hsbeta) (Heterochromatin protein 1 homolog beta) (HP1 beta) (Heterochromatin protein p25) (M31) (Modifier 1 protein) (p25beta)	CBX1_HUMAN				-0.24105		-0.116276	-0.443148		-0.502306
Q13185	CBX3	Chromobox protein homolog 3 (HECH) (Heterochromatin protein 1 homolog gamma) (HP1 gamma) (Modifier 2 protein)	CBX3_HUMAN	-0.478436	0.337211	-0.0527698	-0.204074	0.235209	-0.116276	-0.257149	0.11517	-0.42741
O75390	CS	Citrate synthase, mitochondrial (EC 2.3.3.1) (Citrate (Si)-synthase)	CISY_HUMAN	1.3027	0.163096	0.301555	-0.361581	0.737858	0.848548	-0.18854	-0.0860407
Q00610	CLTC CLH17 CLTCL2 KIAA0034	Clathrin heavy chain 1 (Clathrin heavy chain on chromosome 17) (CLH-17)	CLH1_HUMAN	-1.39492	-0.0177281	-0.118097		-1.72738	-0.622124	-0.122661		0.364899
P10909	CLU APOJ CLI KUB1 AAG4	Clusterin (Aging-associated gene 4 protein) (Apolipoprotein J) (Apo-J) (Complement cytolysis inhibitor) (CLI) (Complement-associated protein SP-40,40) (Ku70-binding protein 1) (NA1/NA2) (Testosterone-repressed prostate message 2) (TRPM-2) [Cleaved into: Clusterin beta chain (ApoJalpha) (Complement cytolysis inhibitor a chain); Clusterin alpha chain (ApoJbeta) (Complement cytolysis inhibitor b cha…	CLUS_HUMAN	-1.18229	-1.15036	-0.900914	1.1943	-3.2625	-3.82054	0.180811	-0.200799	0.418197
Q14019	COTL1 CLP	Coactosin-like protein	COTL1_HUMAN	1.11726	0.068139	-0.127759	0.132488	0.606316	0.317625	0.247323	0.021278	0.10202
O14579	COPE	Coatomer subunit epsilon (Epsilon-coat protein) (Epsilon-COP)	COPE_HUMAN		-0.287628					-0.0980735	-0.38196
Q9Y678	COPG1 COPG	Coatomer subunit gamma-1 (Gamma-1-coat protein) (Gamma-1-COP)	COPG1_HUMAN						-0.165285
O43405	COCH COCH5B2 UNQ257/PRO294	Cochlin (COCH-5B2)	COCH_HUMAN		-0.121858		-0.246515	1.70813			-0.246367
P23528	CFL1 CFL	Cofilin-1 (18 kDa phosphoprotein) (p18) (Cofilin, non-muscle isoform)	COF1_HUMAN	0.606735	-0.578072	-0.0696176	-0.979532	0.776566	0.92713	0.223477	0.273982	-0.228426
Q9Y281	CFL2	Cofilin-2 (Cofilin, muscle isoform)	COF2_HUMAN			-0.0928965	-0.965044	0.758221	0.851298	0.207204	0.272758
Q14011	CIRBP A18HNRNP CIRP	Cold-inducible RNA-binding protein (A18 hnRNP) (Glycine-rich RNA-binding protein CIRP)	CIRBP_HUMAN		0.492558			0.157346		-0.207171
P02462	COL4A1	Collagen alpha-1(IV) chain [Cleaved into: Arresten]	CO4A1_HUMAN			-0.0265051				0.79629
P08572	COL4A2	Collagen alpha-2(IV) chain [Cleaved into: Canstatin]	CO4A2_HUMAN	-0.512703		0.816704		-0.329868	0.180572
P00736	C1R	Complement C1r subcomponent (EC 3.4.21.41) (Complement component 1 subcomponent r) [Cleaved into: Complement C1r subcomponent heavy chain; Complement C1r subcomponent light chain]	C1R_HUMAN	-2.68443	-1.58229	0.460883	0.497551	-1.16658	-0.935999	0.414419	-0.0765003	0.160535
P09871	C1S	Complement C1s subcomponent (EC 3.4.21.42) (C1 esterase) (Complement component 1 subcomponent s) [Cleaved into: Complement C1s subcomponent heavy chain; Complement C1s subcomponent light chain]	C1S_HUMAN			0.445328		-1.22031	-0.785419	0.40911		0.150671
P01024	C3 CPAMD1	Complement C3 (C3 and PZP-like alpha-2-macroglobulin domain-containing protein 1) [Cleaved into: Complement C3 beta chain; C3-beta-c (C3bc); Complement C3 alpha chain; C3a anaphylatoxin; Acylation stimulating protein (ASP) (C3adesArg); Complement C3b alpha' chain; Complement C3c alpha' chain fragment 1; Complement C3dg fragment; Complement C3g fragment; Complement C3d fragment; Complement C3f fra…	CO3_HUMAN	-3.39758	-0.892078	0.463459	0.7815	-0.134889	-0.63721	0.329852	0.0190913	-0.0381232
Q07021	C1QBP GC1QBP HABP1 SF2P32	Complement component 1 Q subcomponent-binding protein, mitochondrial (ASF/SF2-associated protein p32) (Glycoprotein gC1qBP) (C1qBP) (Hyaluronan-binding protein 1) (Mitochondrial matrix protein p32) (gC1q-R protein) (p33)	C1QBP_HUMAN	0.551809	0.246257	0.436176	-0.623312	0.873901	0.201706	0.149317	-0.0918583	-0.268171
P00751	CFB BF BFD	Complement factor B (EC 3.4.21.47) (C3/C5 convertase) (Glycine-rich beta glycoprotein) (GBG) (PBF2) (Properdin factor B) [Cleaved into: Complement factor B Ba fragment; Complement factor B Bb fragment]	CFAB_HUMAN	-4.66228	-1.01687	0.703576	2.1835	-0.57629	-0.767585	-0.0554328	-0.0921734	-0.0432604
P08603	CFH HF HF1 HF2	Complement factor H (H factor 1)	CFAH_HUMAN	-3.50046	0.425921	1.63438		-0.437718	0.853129	-0.176717	-0.0902836	0.0725598
P05156	CFI IF	Complement factor I (EC 3.4.21.45) (C3B/C4B inactivator) [Cleaved into: Complement factor I heavy chain; Complement factor I light chain]	CFAI_HUMAN	-5.4494		-0.575941	2.81074	-2.72738	-1.22333	0.116957		-0.138086
P29279	CTGF CCN2 HCS24 IGFBP8	Connective tissue growth factor (CCN family member 2) (Hypertrophic chondrocyte-specific protein 24) (Insulin-like growth factor-binding protein 8) (IBP-8) (IGF-binding protein 8) (IGFBP-8)	CTGF_HUMAN	-0.987898	-0.467524	-0.6121	-1.43601		-0.0509625		0.573236	0.0791936
Q9ULV4	CORO1C CRN2 CRNN4	Coronin-1C (Coronin-3) (hCRNN4)	COR1C_HUMAN		0.122238		-0.0526384	-0.366591			0.405917
P12277	CKB CKBB	Creatine kinase B-type (EC 2.7.3.2) (B-CK) (Creatine kinase B chain)	KCRB_HUMAN	2.01007				0.852649
P19876	CXCL3 GRO3 GROG SCYB3	C-X-C motif chemokine 3 (GRO-gamma(1-73)) (Growth-regulated protein gamma) (GRO-gamma) (Macrophage inflammatory protein 2-beta) (MIP2-beta) [Cleaved into: GRO-gamma(5-73)]	CXCL3_HUMAN	-4.72852		2.09983	3.89484	1.0637	0.567784	0.122806
P01040	CSTA STF1 STFA	Cystatin-A (Cystatin-AS) (Stefin-A) [Cleaved into: Cystatin-A, N-terminally processed]	CYTA_HUMAN		-0.694146	-0.668521	0.0195581
P04080	CSTB CST6 STFB	Cystatin-B (CPI-B) (Liver thiol proteinase inhibitor) (Stefin-B)	CYTB_HUMAN	-0.194156	0.0437319	-0.242525	0.42836	0.358632	-0.182435	0.161997	0.0466904	-0.105482
P01034	CST3	Cystatin-C (Cystatin-3) (Gamma-trace) (Neuroendocrine basic polypeptide) (Post-gamma-globulin)	CYTC_HUMAN	-0.543656	-0.460718	0.0541586	0.158909	-0.461887	-0.699985	0.453625	-0.217031	0.0898699
Q15828	CST6	Cystatin-M (Cystatin-6) (Cystatin-E)	CYTM_HUMAN	-0.0266008	-0.448549	-0.29926	-0.97378	-0.254495	0.0932643	0.738201	-0.0978577	0.263145
P99999	CYCS CYC	Cytochrome c	CYC_HUMAN	-0.111524	-0.0346657	0.0248064	0.222261	0.500978	-0.379884	0.00950303	0.265398	-0.346018
Q96KP4	CNDP2 CN2 CPGL HEL-S-13 PEPA	Cytosolic non-specific dipeptidase (EC 3.4.13.18) (CNDP dipeptidase 2) (Carnosine dipeptidase II) (Epididymis secretory protein Li 13) (Glutamate carboxypeptidase-like protein 1) (Peptidase A)	CNDP2_HUMAN			-0.393316		-0.0613618		-0.11978
P30046	DDT	D-dopachrome decarboxylase (EC 4.1.1.84) (D-dopachrome tautomerase) (Phenylpyruvate tautomerase II)	DOPD_HUMAN	0.225838	0.206498	0.337109	0.489903	0.350491	-0.254138	0.40911	0.201267	-0.107991
A6NL28		Deleted.	TPM3L_HUMAN	-0.265024		-0.495935			-0.238261			-0.12423
Q13011	ECH1	Delta(3,5)-Delta(2,4)-dienoyl-CoA isomerase, mitochondrial (EC 5.3.3.-)	ECH1_HUMAN	0.170819				0.0778616
O00115	DNASE2 DNASE2A DNL2	Deoxyribonuclease-2-alpha (EC 3.1.22.1) (Acid DNase) (Deoxyribonuclease II alpha) (DNase II alpha) (Lysosomal DNase II) (R31240_2)	DNS2A_HUMAN		-0.262048
P33316	DUT	Deoxyuridine 5'-triphosphate nucleotidohydrolase, mitochondrial (dUTPase) (EC 3.6.1.23) (dUTP pyrophosphatase)	DUT_HUMAN		-0.0967695						0.22802
Q14574	DSC3 CDHF3 DSC4	Desmocollin-3 (Cadherin family member 3) (Desmocollin-4) (HT-CP)	DSC3_HUMAN	-0.730038	-1.17848	-0.119446	-0.595849	-1.42988	-1.32152	0.527755	-0.0310815	0.212321
Q14126	DSG2 CDHF5	Desmoglein-2 (Cadherin family member 5) (HDGC)	DSG2_HUMAN	-0.540669	-0.399568	0.000532262	-0.351732	-0.666638	-0.1213	0.438071	-0.0656296	0.0492592
P60981	DSTN ACTDP DSN	Destrin (Actin-depolymerizing factor) (ADF)	DEST_HUMAN					0.550552	-0.148335	-0.228319
O94907	DKK1 UNQ492/PRO1008	Dickkopf-related protein 1 (Dickkopf-1) (Dkk-1) (hDkk-1) (SK)	DKK1_HUMAN		-0.159304
P53634	CTSC CPPI	Dipeptidyl peptidase 1 (EC 3.4.14.1) (Cathepsin C) (Cathepsin J) (Dipeptidyl peptidase I) (DPP-I) (DPPI) (Dipeptidyl transferase) [Cleaved into: Dipeptidyl peptidase 1 exclusion domain chain (Dipeptidyl peptidase I exclusion domain chain); Dipeptidyl peptidase 1 heavy chain (Dipeptidyl peptidase I heavy chain); Dipeptidyl peptidase 1 light chain (Dipeptidyl peptidase I light chain)]	CATC_HUMAN	-0.430641	-0.175132	0.182606	-0.112084	-0.149329	0.102683	0.393066	-0.17637	0.127541
Q9UHL4	DPP7 DPP2 QPP	Dipeptidyl peptidase 2 (EC 3.4.14.2) (Dipeptidyl aminopeptidase II) (Dipeptidyl peptidase 7) (Dipeptidyl peptidase II) (DPP II) (Quiescent cell proline dipeptidase)	DPP2_HUMAN	0.0508601
Q9NY33	DPP3	Dipeptidyl peptidase 3 (EC 3.4.14.4) (Dipeptidyl aminopeptidase III) (Dipeptidyl arylamidase III) (Dipeptidyl peptidase III) (DPP III) (Enkephalinase B)	DPP3_HUMAN	-0.249931	-0.0759679	-0.132809	0.158909	0.0594289	-0.30468	0.173628	0.222963	0.00133121
Q16531	DDB1 XAP1	DNA damage-binding protein 1 (DDB p127 subunit) (DNA damage-binding protein a) (DDBa) (Damage-specific DNA-binding protein 1) (HBV X-associated protein 1) (XAP-1) (UV-damaged DNA-binding factor) (UV-damaged DNA-binding protein 1) (UV-DDB 1) (XPE-binding factor) (XPE-BF) (Xeroderma pigmentosum group E-complementing protein) (XPCe)	DDB1_HUMAN	-0.409734	0.0161197	-0.0742808	0.289255	-0.283521	-0.254335	-0.0471998		-0.303279
P27695	APEX1 APE APE1 APEX APX HAP1 REF1	DNA-(apurinic or apyrimidinic site) lyase (EC 3.1.-.-) (EC 4.2.99.18) (APEX nuclease) (APEN) (Apurinic-apyrimidinic endonuclease 1) (AP endonuclease 1) (APE-1) (REF-1) (Redox factor-1) [Cleaved into: DNA-(apurinic or apyrimidinic site) lyase, mitochondrial]	APEX1_HUMAN	-0.20049	-0.0106107	-0.128147	0.300541	-0.583179	-0.369599	-0.0393763	0.0903904	-0.322719
O75937	DNAJC8 SPF31 HSPC315 HSPC331	DnaJ homolog subfamily C member 8 (Splicing protein spf31)	DNJC8_HUMAN	-0.42894					-0.110734
Q8TEA8	DTD1 C20orf88 DUEB HARS2	D-tyrosyl-tRNA(Tyr) deacylase 1 (EC 3.1.-.-) (DNA-unwinding element-binding protein B) (DUE-B) (Histidyl-tRNA synthase-related)	DTD1_HUMAN		-0.104932		-0.706722		-0.197327	0.00827468	-0.0359233
Q96FJ2	DYNLL2 DLC2	Dynein light chain 2, cytoplasmic (8 kDa dynein light chain b) (DLC8b) (Dynein light chain LC8-type 2)	DYL2_HUMAN					-0.671129
Q15075	EEA1 ZFYVE2	Early endosome antigen 1 (Endosome-associated protein p162) (Zinc finger FYVE domain-containing protein 2)	EEA1_HUMAN	-0.00110521	0.0216846	-0.167465	-0.336112	-0.623159	-0.569675	0.347999		-0.27279
Q12805	EFEMP1 FBLN3 FBNL	EGF-containing fibulin-like extracellular matrix protein 1 (Extracellular protein S1-5) (Fibrillin-like protein) (Fibulin-3) (FIBL-3)	FBLN3_HUMAN	-1.95785	-0.845237	0.338513	0.325309	-1.33605	-1.62518	0.542377	-0.0866685	0.250606
P68104	EEF1A1 EEF1A EF1A LENG7	Elongation factor 1-alpha 1 (EF-1-alpha-1) (Elongation factor Tu) (EF-Tu) (Eukaryotic elongation factor 1 A-1) (eEF1A-1) (Leukocyte receptor cluster member 7)	EF1A1_HUMAN	1.71358	0.420665	-0.242945	-0.633299	-0.00521394	1.54927	-0.239949	-0.0693475	0.654406
P24534	EEF1B2 EEF1B EF1B	Elongation factor 1-beta (EF-1-beta)	EF1B_HUMAN	0.417639	0.17563	0.145387	0.240606	-0.0306584	0.0979042	-0.119396	0.212794	-0.0725468
P29692	EEF1D EF1D	Elongation factor 1-delta (EF-1-delta) (Antigen NY-CO-4)	EF1D_HUMAN	0.436422	0.347218	0.137826	0.195642	0.00845114	0.505123	-0.319899	-0.313306
P26641	EEF1G EF1G PRO1608	Elongation factor 1-gamma (EF-1-gamma) (eEF-1B gamma)	EF1G_HUMAN	1.42882	0.227117	0.447932	0.317923	0.259014	0.749798	-0.0490253	-0.142197	0.154116
P13639	EEF2 EF2	Elongation factor 2 (EF-2)	EF2_HUMAN	1.76045	0.113144	-0.152792	-0.176343	-0.0116455	1.31563	-0.116905	-0.0970669	0.415703
Q9H9K5	ERVMER34-1 LP9056	Endogenous retrovirus group MER34 member 1 Env polyprotein (HERV-MER_4q12 provirus ancestral Env polyprotein)	MER34_HUMAN		0.0841839		-0.403088				0.0351948
P30040	ERP29 C12orf8 ERP28	Endoplasmic reticulum resident protein 29 (ERp29) (Endoplasmic reticulum resident protein 28) (ERp28) (Endoplasmic reticulum resident protein 31) (ERp31)	ERP29_HUMAN	-0.104889	-0.155217	0.0305511		-0.453311	-0.114307	0.04125		-0.0175869
Q9BS26	ERP44 KIAA0573 TXNDC4 UNQ532/PRO1075	Endoplasmic reticulum resident protein 44 (ER protein 44) (ERp44) (Thioredoxin domain-containing protein 4)	ERP44_HUMAN	0.464144	0.290723	0.0708118		-0.609029	-0.293699	-0.46711		-0.236641
P14625	HSP90B1 GRP94 TRA1	Endoplasmin (94 kDa glucose-regulated protein) (GRP-94) (Heat shock protein 90 kDa beta member 1) (Tumor rejection antigen 1) (gp96 homolog)	ENPL_HUMAN	-0.00807171	-0.0931564	0.253539	0.214326	-0.881027	0.38498	-0.324977	0.396963	0.196863
Q9UNN8	PROCR EPCR	Endothelial protein C receptor (Activated protein C receptor) (APC receptor) (Endothelial cell protein C receptor) (CD antigen CD201)	EPCR_HUMAN		-0.387717						-0.196727
P84090	ERH	Enhancer of rudimentary homolog	ERH_HUMAN		-0.0575141	-0.200117	-0.0494508	0.235209		-0.101479
Q9UHY7	ENOPH1 MASA MSTP145	Enolase-phosphatase E1 (EC 3.1.3.77) (2,3-diketo-5-methylthio-1-phosphopentane phosphatase) (MASA homolog)	ENOPH_HUMAN		-0.00352824		-0.151525
P42126	ECI1 DCI	Enoyl-CoA delta isomerase 1, mitochondrial (EC 5.3.3.8) (3,2-trans-enoyl-CoA isomerase) (Delta(3),Delta(2)-enoyl-CoA isomerase) (D3,D2-enoyl-CoA isomerase) (Dodecenoyl-CoA isomerase)	ECI1_HUMAN	-0.50686		0.249664						-0.565697
P30084	ECHS1	Enoyl-CoA hydratase, mitochondrial (EC 4.2.1.17) (Enoyl-CoA hydratase 1) (Short-chain enoyl-CoA hydratase) (SCEH)	ECHM_HUMAN			0.478821		0.845218		-0.262646
P29323	EPHB2 DRT EPHT3 EPTH3 ERK HEK5 TYRO5	Ephrin type-B receptor 2 (EC 2.7.10.1) (Developmentally-regulated Eph-related tyrosine kinase) (ELK-related tyrosine kinase) (EPH tyrosine kinase 3) (EPH-like kinase 5) (EK5) (hEK5) (Renal carcinoma antigen NY-REN-47) (Tyrosine-protein kinase TYRO5) (Tyrosine-protein kinase receptor EPH-3)	EPHB2_HUMAN					-0.196431	-0.127967
P00533	EGFR ERBB ERBB1 HER1	Epidermal growth factor receptor (EC 2.7.10.1) (Proto-oncogene c-ErbB-1) (Receptor tyrosine-protein kinase erbB-1)	EGFR_HUMAN			-0.0774604						-0.073948
P61916	NPC2 HE1	Epididymal secretory protein E1 (Human epididymis-specific protein 1) (He1) (Niemann-Pick disease type C2 protein)	NPC2_HUMAN	0.487972	-0.208295	0.150512	-0.0888288	-0.00596033	-0.341268	0.58184	-0.0455033	0.294703
Q9Y2E5	MAN2B2 KIAA0935	Epididymis-specific alpha-mannosidase (EC 3.2.1.24) (Mannosidase alpha class 2B member 2)	MA2B2_HUMAN	-0.746625					-0.656617			-0.153928
Q96HE7	ERO1A ERO1L UNQ434/PRO865	ERO1-like protein alpha (ERO1-L) (ERO1-L-alpha) (EC 1.8.4.-) (Endoplasmic oxidoreductin-1-like protein) (Endoplasmic reticulum oxidoreductase alpha) (Oxidoreductin-1-L-alpha)	ERO1A_HUMAN	-0.356024	0.00492508	0.24428		-0.55888	-0.0791414	-0.464915	-0.00414525	-0.0822076
P30042	C21orf33 HES1 KNPI	ES1 protein homolog, mitochondrial (Protein GT335) (Protein KNP-I)	ES1_HUMAN	-0.0424423
Q9H0W9	C11orf54 LP4947 PTD012	Ester hydrolase C11orf54 (EC 3.1.-.-)	CK054_HUMAN	0.240607
P60842	EIF4A1 DDX2A EIF4A	Eukaryotic initiation factor 4A-I (eIF-4A-I) (eIF4A-I) (EC 3.6.4.13) (ATP-dependent RNA helicase eIF4A-1)	IF4A1_HUMAN	0.891712	0.219873	-0.0919505	-0.643356	-0.456368		-0.28786	-0.0306284
Q14240	EIF4A2 DDX2B EIF4F	Eukaryotic initiation factor 4A-II (eIF-4A-II) (eIF4A-II) (EC 3.6.4.13) (ATP-dependent RNA helicase eIF4A-2)	IF4A2_HUMAN				-0.55369
P47813	EIF1AX EIF1A EIF4C	Eukaryotic translation initiation factor 1A, X-chromosomal (eIF-1A X isoform) (Eukaryotic translation initiation factor 4C) (eIF-4C)	IF1AX_HUMAN			-0.0658979		0.171939		-0.0792979
P05198	EIF2S1 EIF2A	Eukaryotic translation initiation factor 2 subunit 1 (Eukaryotic translation initiation factor 2 subunit alpha) (eIF-2-alpha) (eIF-2A) (eIF-2alpha)	IF2A_HUMAN	0.759049		0.100411		-0.181346	0.510933	-0.357409		0.175795
P41091	EIF2S3 EIF2G	Eukaryotic translation initiation factor 2 subunit 3 (Eukaryotic translation initiation factor 2 subunit gamma X) (eIF-2-gamma X) (eIF-2gX)	IF2G_HUMAN			0.12454		-0.26357	0.527078	-0.40384	-0.0710547
P55884	EIF3B EIF3S9	Eukaryotic translation initiation factor 3 subunit B (eIF3b) (Eukaryotic translation initiation factor 3 subunit 9) (Prt1 homolog) (hPrt1) (eIF-3-eta) (eIF3 p110) (eIF3 p116)	EIF3B_HUMAN			-0.0832766					0.270309
Q04637	EIF4G1 EIF4F EIF4G EIF4GI	Eukaryotic translation initiation factor 4 gamma 1 (eIF-4-gamma 1) (eIF-4G 1) (eIF-4G1) (p220)	IF4G1_HUMAN	0.0523829	-0.0735926	0.897038	-0.0958812		-0.0545622	0.223325	-0.0139636	-0.539812
P63241	EIF5A	Eukaryotic translation initiation factor 5A-1 (eIF-5A-1) (eIF-5A1) (Eukaryotic initiation factor 5A isoform 1) (eIF-5A) (Rev-binding factor) (eIF-4D)	IF5A1_HUMAN	0.103959	0.296474	-0.110031	-0.00956964	0.0216951	-0.0134483	-0.108886	-0.0942235	-0.14912
O60841	EIF5B IF2 KIAA0741	Eukaryotic translation initiation factor 5B (eIF-5B) (EC 3.6.5.3) (Translation initiation factor IF-2)	IF2P_HUMAN		0.723512
P56537	EIF6 EIF3A ITGB4BP OK/SW-cl.27	Eukaryotic translation initiation factor 6 (eIF-6) (B(2)GCN homolog) (B4 integrin interactor) (CAB) (p27(BBP))	IF6_HUMAN	0.785844	0.34611	0.23451	0.167153	0.648666	0.548705	0.0372981	-0.0135158	0.117601
Q9BSJ8	ESYT1 FAM62A KIAA0747 MBC2	Extended synaptotagmin-1 (E-Syt1) (Membrane-bound C2 domain-containing protein)	ESYT1_HUMAN		0.388722
Q16610	ECM1	Extracellular matrix protein 1 (Secretory component p85)	ECM1_HUMAN		-0.0148769		0.198326				-0.236406
P15311	EZR VIL2	Ezrin (Cytovillin) (Villin-2) (p81)	EZRI_HUMAN	0.380538	-0.0234474	-0.0559023	0.257434	0.336428	0.0687358	0	0.105584	0.00149752
Q9Y5B9	SUPT16H FACT140 FACTP140	FACT complex subunit SPT16 (Chromatin-specific transcription elongation factor 140 kDa subunit) (FACT 140 kDa subunit) (FACTp140) (Facilitates chromatin transcription complex subunit SPT16) (hSPT16)	SP16H_HUMAN		-0.325456	0.239779	0.29177	-0.467633		-0.0626063
P52907	CAPZA1	F-actin-capping protein subunit alpha-1 (CapZ alpha-1)	CAZA1_HUMAN	0.348667	0.451916	0.0725003	0.28421	0.227609	0.334761	-0.158275	0.0182157	-0.0150613
P47755	CAPZA2	F-actin-capping protein subunit alpha-2 (CapZ alpha-2)	CAZA2_HUMAN			0.24458		0.242769				0.0768279
P47756	CAPZB	F-actin-capping protein subunit beta (CapZ beta)	CAPZB_HUMAN	0.38417	0.275665	0.0111365	0.057453	0.236471	0.35299	0.0613564	0.158199	0.0278639
P14324	FDPS FPS KIAA1293	Farnesyl pyrophosphate synthase (FPP synthase) (FPS) (EC 2.5.1.10) ((2E,6E)-farnesyl diphosphate synthase) (Dimethylallyltranstransferase) (EC 2.5.1.1) (Farnesyl diphosphate synthase) (Geranyltranstransferase)	FPPS_HUMAN	1.1425	0.67578	0.596158	0.343609	0.986254	0.853129
Q16658	FSCN1 FAN1 HSN SNL	Fascin (55 kDa actin-bundling protein) (Singed-like protein) (p55)	FSCN1_HUMAN	1.1339	0.399448	0.230129	0.57498	0.504126	0.729011	0.0196407	-0.163398	-0.208091
P49327	FASN FAS	Fatty acid synthase (EC 2.3.1.85) [Includes: [Acyl-carrier-protein] S-acetyltransferase (EC 2.3.1.38); [Acyl-carrier-protein] S-malonyltransferase (EC 2.3.1.39); 3-oxoacyl-[acyl-carrier-protein] synthase (EC 2.3.1.41); 3-oxoacyl-[acyl-carrier-protein] reductase (EC 1.1.1.100); 3-hydroxyacyl-[acyl-carrier-protein] dehydratase (EC 4.2.1.59); Enoyl-[acyl-carrier-protein] reductase (EC 1.3.1.39); Ole…	FAS_HUMAN		0.254552	0.0964328	-0.399025	-0.247063		-0.329407
Q01469	FABP5	Fatty acid-binding protein, epidermal (Epidermal-type fatty acid-binding protein) (E-FABP) (Fatty acid-binding protein 5) (Psoriasis-associated fatty acid-binding protein homolog) (PA-FABP)	FABP5_HUMAN	0.901884	-0.172429	0.545993	-0.0369283	0.662824	0.407582		-0.163398	-0.726075
P02794	FTH1 FTH FTHL6 OK/SW-cl.84 PIG15	Ferritin heavy chain (Ferritin H subunit) (EC 1.16.3.1) (Cell proliferation-inducing gene 15 protein) [Cleaved into: Ferritin heavy chain, N-terminally processed]	FRIH_HUMAN					0.29824				0.0641448
Q14512	FGFBP1 FGFBP HBP17	Fibroblast growth factor-binding protein 1 (FGF-BP) (FGF-BP1) (FGF-binding protein 1) (FGFBP-1) (17 kDa heparin-binding growth factor-binding protein) (17 kDa HBGF-binding protein) (HBp17)	FGFP1_HUMAN				-0.128975				-0.345064
P23142	FBLN1 PP213	Fibulin-1 (FIBL-1)	FBLN1_HUMAN	-1.25538	-1.05795	0.167991	-0.271366	-1.21443	-0.472234	0.656548	-0.257457	0.265917
P98095	FBLN2	Fibulin-2 (FIBL-2)	FBLN2_HUMAN	-2.0601		-0.610203		-2.24055	-1.01829	0.292857		0.216626
P21333	FLNA FLN FLN1	Filamin-A (FLN-A) (Actin-binding protein 280) (ABP-280) (Alpha-filamin) (Endothelial actin-binding protein) (Filamin-1) (Non-muscle filamin)	FLNA_HUMAN	0.765563	0.0147251	-0.220855	-0.226218	0.0608552	0.332138	-0.107363	0.0253509	0.420687
O75369	FLNB FLN1L FLN3 TABP TAP	Filamin-B (FLN-B) (ABP-278) (ABP-280 homolog) (Actin-binding-like protein) (Beta-filamin) (Filamin homolog 1) (Fh1) (Filamin-3) (Thyroid autoantigen) (Truncated actin-binding protein) (Truncated ABP)	FLNB_HUMAN	0.660646		-0.584164		0.270154	0.489905	-0.0136598
Q14315	FLNC ABPL FLN2	Filamin-C (FLN-C) (FLNc) (ABP-280-like protein) (ABP-L) (Actin-binding-like protein) (Filamin-2) (Gamma-filamin)	FLNC_HUMAN	0.71934	0.126118	0.105038		0.335249	0.513251
P19883	FST	Follistatin (FS) (Activin-binding protein)	FST_HUMAN		-0.412831
Q12841	FSTL1 FRP	Follistatin-related protein 1 (Follistatin-like protein 1)	FSTL1_HUMAN	-0.363924	-0.764717	0.337109	0.268971	0.468031	-0.36172	0.742429	0.0211323	0.237957
P04075	ALDOA ALDA	Fructose-bisphosphate aldolase A (EC 4.1.2.13) (Lung cancer antigen NY-LU-1) (Muscle-type aldolase)	ALDOA_HUMAN	0.162382	0.176878	0.322992	0.146454	0.383923	0.0651072	-0.000176574	0.0792391	0.0547191
P09972	ALDOC ALDC	Fructose-bisphosphate aldolase C (EC 4.1.2.13) (Brain-type aldolase)	ALDOC_HUMAN	0.188931	0.171881	0.334297	0.187559	0.465879	0.0307385	0.0192923	0.0495501	0.0692314
P16930	FAH	Fumarylacetoacetase (FAA) (EC 3.7.1.2) (Beta-diketonase) (Fumarylacetoacetate hydrolase)	FAAA_HUMAN	-0.623104		0.0961008		0.108529	0.143351	-0.0422824		-0.0489326
P09382	LGALS1	Galectin-1 (Gal-1) (14 kDa laminin-binding protein) (HLBP14) (14 kDa lectin) (Beta-galactoside-binding lectin L-14-I) (Galaptin) (HBL) (HPL) (Lactose-binding lectin 1) (Lectin galactoside-binding soluble 1) (Putative MAPK-activating protein PM12) (S-Lac lectin 1)	LEG1_HUMAN	0.97356	0.695063	-0.194624			0.703868			-0.0864435
P17931	LGALS3 MAC2	Galectin-3 (Gal-3) (35 kDa lectin) (Carbohydrate-binding protein 35) (CBP 35) (Galactose-specific lectin 3) (Galactoside-binding protein) (GALBP) (IgE-binding protein) (L-31) (Laminin-binding protein) (Lectin L-29) (Mac-2 antigen)	LEG3_HUMAN	-0.403249								-0.149305
Q08380	LGALS3BP M2BP	Galectin-3-binding protein (Basement membrane autoantigen p105) (Lectin galactoside-binding soluble 3-binding protein) (Mac-2-binding protein) (MAC2BP) (Mac-2 BP) (Tumor-associated antigen 90K)	LG3BP_HUMAN	-0.961227	-0.831877	-0.488447	0.0339044	-0.730832	-0.379024	0.33546	-0.0640833	0.0714512
P09104	ENO2	Gamma-enolase (EC 4.2.1.11) (2-phospho-D-glycerate hydro-lyase) (Enolase 2) (Neural enolase) (Neuron-specific enolase) (NSE)	ENOG_HUMAN	0.552885	0.291875			0.478741	0.263585
Q92820	GGH	Gamma-glutamyl hydrolase (EC 3.4.19.9) (Conjugase) (GH) (Gamma-Glu-X carboxypeptidase)	GGH_HUMAN	0.298218	-0.241905	0.867191	-0.0185797	0.256526	0.524783	0.476648	-0.07121	0.254798
O75223	GGCT C7orf24 CRF21	Gamma-glutamylcyclotransferase (EC 2.3.2.4) (Cytochrome c-releasing factor 21)	GGCT_HUMAN	0.465288	-0.201796		0.295536				-0.149722	0.123573
P13284	IFI30 GILT IP30	Gamma-interferon-inducible lysosomal thiol reductase (EC 1.8.-.-) (Gamma-interferon-inducible protein IP-30) (Legumaturain)	GILT_HUMAN	0.427061				-0.0813604	0.00643068	-0.107554		0.306867
P17900	GM2A	Ganglioside GM2 activator (Cerebroside sulfate activator protein) (GM2-AP) (Sphingolipid activator protein 3) (SAP-3) [Cleaved into: Ganglioside GM2 activator isoform short]	SAP3_HUMAN	0.0442937	-0.232104	0.417697	0.355682	-0.100524		0.226045	-0.669905	0.247805
Q9H488	POFUT1 FUT12 KIAA0180	GDP-fucose protein O-fucosyltransferase 1 (EC 2.4.1.221) (Peptide-O-fucosyltransferase 1) (O-FucT-1)	OFUT1_HUMAN				0.326536
P60983	GMFB	Glia maturation factor beta (GMF-beta)	GMFB_HUMAN					-0.157764
Q96EK6	GNPNAT1 GNA1	Glucosamine 6-phosphate N-acetyltransferase (EC 2.3.1.4) (Phosphoglucosamine acetylase) (Phosphoglucosamine transacetylase)	GNA1_HUMAN		0.865665			0.432111
P46926	GNPDA1 GNPI HLN KIAA0060	Glucosamine-6-phosphate isomerase 1 (EC 3.5.99.6) (Glucosamine-6-phosphate deaminase 1) (GNPDA 1) (GlcN6P deaminase 1) (Oscillin)	GNPI1_HUMAN	0.0838469	0.190529	0.137504	-0.102473	0.0693835	0.11997	0.0409068	-0.0822796	0.146014
Q8TDQ7	GNPDA2 GNP2	Glucosamine-6-phosphate isomerase 2 (EC 3.5.99.6) (Glucosamine-6-phosphate deaminase 2) (GNPDA 2) (GlcN6P deaminase 2) (Glucosamine-6-phosphate isomerase SB52)	GNPI2_HUMAN				-0.142497	0.021109
P06744	GPI	Glucose-6-phosphate isomerase (GPI) (EC 5.3.1.9) (Autocrine motility factor) (AMF) (Neuroleukin) (NLK) (Phosphoglucose isomerase) (PGI) (Phosphohexose isomerase) (PHI) (Sperm antigen 36) (SA-36)	G6PI_HUMAN	0.558255	0.155523	0.147471	0.285473	0.321036	-0.0332668	0.0622022	0.06659	-0.0449769
P14314	PRKCSH G19P1	Glucosidase 2 subunit beta (80K-H protein) (Glucosidase II subunit beta) (Protein kinase C substrate 60.1 kDa protein heavy chain) (PKCSH)	GLU2B_HUMAN	0.0744345	-0.0994853	0.0345415	-0.015933	-0.547968	-0.219476	-0.233292	0.286156	-0.304923
P00367	GLUD1 GLUD	Glutamate dehydrogenase 1, mitochondrial (GDH 1) (EC 1.4.1.3)	DHE3_HUMAN	0.0866735					0.251142			-0.442941
P00390	GSR GLUR GRD1	Glutathione reductase, mitochondrial (GR) (GRase) (EC 1.8.1.7)	GSHR_HUMAN	-0.618008		-0.0712946		-0.607442	-0.516936	-0.0711134		-0.0757014
P78417	GSTO1 GSTTLP28	Glutathione S-transferase omega-1 (GSTO-1) (EC 2.5.1.18) (Glutathione S-transferase omega 1-1) (GSTO 1-1) (Glutathione-dependent dehydroascorbate reductase) (EC 1.8.5.1) (Monomethylarsonic acid reductase) (MMA(V) reductase) (EC 1.20.4.2) (S-(Phenacyl)glutathione reductase) (SPG-R)	GSTO1_HUMAN	0.574243	0.481495	-0.0361164	-0.13285	0.717202	0.726017	0.146289	-0.0899689	-0.142122
P09211	GSTP1 FAEES3 GST3	Glutathione S-transferase P (EC 2.5.1.18) (GST class-pi) (GSTP1-1)	GSTP1_HUMAN	-0.289121	-0.297469	-0.283623	-0.104787	-0.518274	-0.919651	-0.0370194	-0.0236989	-0.0218061
P48637	GSS	Glutathione synthetase (GSH synthetase) (GSH-S) (EC 6.3.2.3) (Glutathione synthase)	GSHB_HUMAN	0.0418427	0.0272281	-0.271149	-0.00369685	-0.00969807	0.0581399	0.0895074	0.0609323	-0.0795664
P04406	GAPDH GAPD CDABP0047 OK/SW-cl.12	Glyceraldehyde-3-phosphate dehydrogenase (GAPDH) (EC 1.2.1.12) (Peptidyl-cysteine S-nitrosylase GAPDH) (EC 2.6.99.-)	G3P_HUMAN	0.83179	0.554334	0.812669	0.00430105	0.62572	0.891049	0.0103798	0.0423903	0.189875
A6NDG6	PGP	Glycerol-3-phosphate phosphatase (G3PP) (EC 3.1.3.21) (Aspartate-based ubiquitous Mg(2+)-dependent phosphatase) (AUM) (EC 3.1.3.48) (Phosphoglycolate phosphatase) (PGP)	PGP_HUMAN					0.37707
P06737	PYGL	Glycogen phosphorylase, liver form (EC 2.4.1.1)	PYGL_HUMAN			-0.0403074		-0.216679		-0.0615003
Q9HC38	GLOD4 C17orf25 CGI-150 My027	Glyoxalase domain-containing protein 4	GLOD4_HUMAN	-0.0391952	0.0409943		0.149231	0.23268	0.037034	0.100583		-0.0972662
P35052	GPC1	Glypican-1 [Cleaved into: Secreted glypican-1]	GPC1_HUMAN	-1.56521	-0.876209	0.627509	-0.779059		-2.18112	0.613344	-0.0298736	0.020661
P28799	GRN	Granulins (Proepithelin) (PEPI) [Cleaved into: Acrogranin (Glycoprotein of 88 Kda) (GP88) (Glycoprotein 88) (Progranulin); Paragranulin; Granulin-1 (Granulin G); Granulin-2 (Granulin F); Granulin-3 (Granulin B); Granulin-4 (Granulin A); Granulin-5 (Granulin C); Granulin-6 (Granulin D); Granulin-7 (Granulin E)]	GRN_HUMAN	-2.00902	-1.21859	-0.886408	-0.578286	-1.45861	-1.80752	0.267266	-0.207441	0.094555
Q99988	GDF15 MIC1 PDF PLAB PTGFB	Growth/differentiation factor 15 (GDF-15) (Macrophage inhibitory cytokine 1) (MIC-1) (NSAID-activated gene 1 protein) (NAG-1) (NSAID-regulated gene 1 protein) (NRG-1) (Placental TGF-beta) (Placental bone morphogenetic protein) (Prostate differentiation factor)	GDF15_HUMAN	-0.40158	0.228321	1.06251	-0.422544	0.670319	1.20242	0.253853	-0.0893397
P09341	CXCL1 GRO GRO1 GROA MGSA SCYB1	Growth-regulated alpha protein (C-X-C motif chemokine 1) (GRO-alpha(1-73)) (Melanoma growth stimulatory activity) (MGSA) (Neutrophil-activating protein 3) (NAP-3) [Cleaved into: GRO-alpha(4-73); GRO-alpha(5-73); GRO-alpha(6-73)]	GROA_HUMAN				3.86348
P62826	RAN ARA24 OK/SW-cl.81	GTP-binding nuclear protein Ran (Androgen receptor-associated protein 24) (GTPase Ran) (Ras-like protein TC4) (Ras-related nuclear protein)	RAN_HUMAN	1.74264	0.582847	0.367687	0.0680579	0.938949	1.25669	0.0800176	0.0262222	-0.172383
P08107	HSPA1A HSPA1 HSX70; HSPA1B	Heat shock 70 kDa protein 1A/1B (Heat shock 70 kDa protein 1/2) (HSP70-1/HSP70-2) (HSP70.1/HSP70.2)	HSP71_HUMAN	0.781259	0.338327	0.0388664	-0.136396	-0.319625	-0.088248	-0.195801	-0.0124717	-0.269374
P34932	HSPA4 APG2	Heat shock 70 kDa protein 4 (HSP70RY) (Heat shock 70-related protein APG-2)	HSP74_HUMAN	0.0493357	0.0272281	-0.00159796	0.139488	0.141257	0.00774625	-0.00743476	0.123336	-0.113744
P17066	HSPA6 HSP70B'	Heat shock 70 kDa protein 6 (Heat shock 70 kDa protein B')	HSP76_HUMAN	0.713576	0.247445	0.0202641	-0.1505	0.105768	0.0310621	-0.145329	-0.0132174	-0.243917
P11142	HSPA8 HSC70 HSP73 HSPA10	Heat shock cognate 71 kDa protein (Heat shock 70 kDa protein 8) (Lipopolysaccharide-associated protein 1) (LAP-1) (LPS-associated protein 1)	HSP7C_HUMAN	0.538831	0.160576	0.0296822	-0.241232	0.385062	0.32951	-0.0430099	-0.0267077	-0.20061
P04792	HSPB1 HSP27 HSP28	Heat shock protein beta-1 (HspB1) (28 kDa heat shock protein) (Estrogen-regulated 24 kDa protein) (Heat shock 27 kDa protein) (HSP 27) (Stress-responsive protein 27) (SRP27)	HSPB1_HUMAN			-0.771688		-1.78515		-0.464428
P07900	HSP90AA1 HSP90A HSPC1 HSPCA	Heat shock protein HSP 90-alpha (Heat shock 86 kDa) (HSP 86) (HSP86) (Lipopolysaccharide-associated protein 2) (LAP-2) (LPS-associated protein 2) (Renal carcinoma antigen NY-REN-38)	HS90A_HUMAN	1.00536	0.340555	0.209252	0.0771278	-0.12043	0.628906	-0.17552	-0.0374397	0.212321
P08238	HSP90AB1 HSP90B HSPC2 HSPCB	Heat shock protein HSP 90-beta (HSP 90) (Heat shock 84 kDa) (HSP 84) (HSP84)	HS90B_HUMAN	0.94679	0.114447	-0.00675903	-0.103464	-0.0943193	0.742903	-0.173925	-0.0606873	0.276951
Q9Y5Z4	HEBP2 C6orf34 SOUL	Heme-binding protein 2 (Placental protein 23) (PP23) (Protein SOUL)	HEBP2_HUMAN				-0.146918		-0.383329		-0.0951707
P08581	MET	Hepatocyte growth factor receptor (HGF receptor) (EC 2.7.10.1) (HGF/SF receptor) (Proto-oncogene c-Met) (Scatter factor receptor) (SF receptor) (Tyrosine-protein kinase Met)	MET_HUMAN	-0.451424	-0.171159	-0.19808	-1.88275	0.158679			0.105584	0.230882
P51858	HDGF HMG1L2	Hepatoma-derived growth factor (HDGF) (High mobility group protein 1-like 2) (HMG-1L2)	HDGF_HUMAN	-0.65829	0.0573423	-0.326816	-0.0204509	-0.0938432	-0.0786178	-0.0339431	0.15289	-0.241356
Q99729	HNRNPAB ABBP1 HNRPAB	Heterogeneous nuclear ribonucleoprotein A/B (hnRNP A/B) (APOBEC1-binding protein 1) (ABBP-1)	ROAA_HUMAN	-0.215072	0.62915	0.153067	0.375977	0	0.195081	-0.289801	0.0328846	-0.279038
P09651	HNRNPA1 HNRPA1	Heterogeneous nuclear ribonucleoprotein A1 (hnRNP A1) (Helix-destabilizing protein) (Single-strand RNA-binding protein) (hnRNP core protein A1) [Cleaved into: Heterogeneous nuclear ribonucleoprotein A1, N-terminally processed]	ROA1_HUMAN	0.298218	0.263974	-0.0341163	0.183501	-0.187937	-0.0579988	-0.13618	0.192238	-0.151707
Q14103	HNRNPD AUF1 HNRPD	Heterogeneous nuclear ribonucleoprotein D0 (hnRNP D0) (AU-rich element RNA-binding protein 1)	HNRPD_HUMAN	-0.225368	0.593162	0.154184	0.536254	-0.224128	0.170916	-0.244544	-0.00651933	-0.358343
P31943	HNRNPH1 HNRPH HNRPH1	Heterogeneous nuclear ribonucleoprotein H (hnRNP H) [Cleaved into: Heterogeneous nuclear ribonucleoprotein H, N-terminally processed]	HNRH1_HUMAN	-0.584016		-0.0384837	0.418034	0.254035	-0.060237	-0.454716		-0.569645
P61978	HNRNPK HNRPK	Heterogeneous nuclear ribonucleoprotein K (hnRNP K) (Transformation up-regulated nuclear protein) (TUNP)	HNRPK_HUMAN	0.204082	0.141534	0.398978	0.207681	0.126349	0.17546		-0.0511594	-0.172758
O60506	SYNCRIP HNRPQ NSAP1	Heterogeneous nuclear ribonucleoprotein Q (hnRNP Q) (Glycine- and tyrosine-rich RNA-binding protein) (GRY-RBP) (NS1-associated protein 1) (Synaptotagmin-binding, cytoplasmic RNA-interacting protein)	HNRPQ_HUMAN	-0.127297	0.480485	0.206179		-0.65793	0.142752	-0.361032		-0.0466954
P22626	HNRNPA2B1 HNRPA2B1	Heterogeneous nuclear ribonucleoproteins A2/B1 (hnRNP A2/B1)	ROA2_HUMAN	-0.5515	0.165612	-0.149639	0.231462	-0.0973387	-0.0654154	-0.196004	0.362882	-0.129319
P07910	HNRNPC HNRPC	Heterogeneous nuclear ribonucleoproteins C1/C2 (hnRNP C1/C2)	HNRPC_HUMAN	-0.479536	0.0161197	0.610176	0.179432	-0.0114956	0.160899	-0.0988296	0.0129509	-0.390934
P09429	HMGB1 HMG1	High mobility group protein B1 (High mobility group protein 1) (HMG-1)	HMGB1_HUMAN	-0.162369	-0.0578076	-0.0259629	-0.0548739	-0.149494	0.16341	-0.147674	0.0651776
P26583	HMGB2 HMG2	High mobility group protein B2 (High mobility group protein 2) (HMG-2)	HMGB2_HUMAN		0.090817	0.179789	-0.050247	-0.0943193		-0.159458	0.0183617
O15347	HMGB3 HMG2A HMG4	High mobility group protein B3 (High mobility group protein 2a) (HMG-2a) (High mobility group protein 4) (HMG-4)	HMGB3_HUMAN					0.0165591		-0.16598
P17096	HMGA1 HMGIY	High mobility group protein HMG-I/HMG-Y (HMG-I(Y)) (High mobility group AT-hook protein 1) (High mobility group protein A1) (High mobility group protein R)	HMGA1_HUMAN					-0.0835647		-0.138316
P12081	HARS HRS	Histidine--tRNA ligase, cytoplasmic (EC 6.1.1.21) (Histidyl-tRNA synthetase) (HisRS)	SYHC_HUMAN	0.329955	0.0947823	-0.0838407		0.374778	0.122098	-0.0426461	0.219158	-0.10405
P04908	HIST1H2AB H2AFM; HIST1H2AE H2AFA	Histone H2A type 1-B/E (Histone H2A.2) (Histone H2A/a) (Histone H2A/m)	H2A1B_HUMAN		-0.0435002		-0.249072		0.435955	0.107646
Q6FI13	HIST2H2AA3 H2AFO HIST2H2AA; HIST2H2AA4	Histone H2A type 2-A (Histone H2A.2) (Histone H2A/o)	H2A2A_HUMAN		-0.124929		-0.244144				-0.286373
P33778	HIST1H2BB H2BFF	Histone H2B type 1-B (Histone H2B.1) (Histone H2B.f) (H2B/f)	H2B1B_HUMAN					0.63245
Q09028	RBBP4 RBAP48	Histone-binding protein RBBP4 (Chromatin assembly factor 1 subunit C) (CAF-1 subunit C) (Chromatin assembly factor I p48 subunit) (CAF-I 48 kDa subunit) (CAF-I p48) (Nucleosome-remodeling factor subunit RBAP48) (Retinoblastoma-binding protein 4) (RBBP-4) (Retinoblastoma-binding protein p48)	RBBP4_HUMAN	-0.335964	0.00913324		0.294282	0.0429244	-0.186003			-0.251428
P01892	HLA-A HLAA	HLA class I histocompatibility antigen, A-2 alpha chain (MHC class I antigen A*2)	1A02_HUMAN	-0.36433
P18462	HLA-A HLAA	HLA class I histocompatibility antigen, A-25 alpha chain (HLA class I histocompatibility antigen, A-10 alpha chain) (MHC class I antigen A*25)	1A25_HUMAN		-0.880354		-0.107933
P30453	HLA-A HLAA	HLA class I histocompatibility antigen, A-34 alpha chain (Aw-34) (HLA class I histocompatibility antigen, A-10 alpha chain) (MHC class I antigen A*34)	1A34_HUMAN						-0.105568
P10316	HLA-A HLAA	HLA class I histocompatibility antigen, A-69 alpha chain (Aw-69) (HLA class I histocompatibility antigen, A-28 alpha chain) (MHC class I antigen A*69)	1A69_HUMAN				-0.281053
Q95604	HLA-C D6S204 HLA-JY3 HLAC	HLA class I histocompatibility antigen, Cw-17 alpha chain (MHC class I antigen Cw*17)	1C17_HUMAN				0.0651199	-0.223607
P30501	HLA-C HLAC	HLA class I histocompatibility antigen, Cw-2 alpha chain (MHC class I antigen Cw*2)	1C02_HUMAN						0.055439
P00492	HPRT1 HPRT	Hypoxanthine-guanine phosphoribosyltransferase (HGPRT) (HGPRTase) (EC 2.4.2.8)	HPRT_HUMAN	0.761844	0.100052	0.0970966	-0.0885016	0.475536	0.181884	0.0858521	-0.0614584	0.120361
Q9Y4L1	HYOU1 GRP170 ORP150	Hypoxia up-regulated protein 1 (150 kDa oxygen-regulated protein) (ORP-150) (170 kDa glucose-regulated protein) (GRP-170)	HYOU1_HUMAN	1.49695		0.126329		-0.433294	0.0115219	-0.606128		-0.157637
Q14974	KPNB1 NTF97	Importin subunit beta-1 (Importin-90) (Karyopherin subunit beta-1) (Nuclear factor p97) (Pore targeting complex 97 kDa subunit) (PTAC97)	IMB1_HUMAN	-0.421312		-0.125821		-1.10388	-0.0347896	-0.0299717		0.755492
O00410	IPO5 KPNB3 RANBP5	Importin-5 (Imp5) (Importin subunit beta-3) (Karyopherin beta-3) (Ran-binding protein 5) (RanBP5)	IPO5_HUMAN					-0.608348	0.429835
Q15181	PPA1 IOPPP PP	Inorganic pyrophosphatase (EC 3.6.1.1) (Pyrophosphate phospho-hydrolase) (PPase)	IPYR_HUMAN	1.34991				0.69441	0.723017	-0.0918505	-0.261705	-0.0343676
Q9NPH2	ISYNA1 INO1	Inositol-3-phosphate synthase 1 (IPS 1) (EC 5.5.1.4) (Myo-inositol 1-phosphate synthase) (MI-1-P synthase) (MIP synthase) (hIPS) (Myo-inositol 1-phosphate synthase A1) (hINO1)	INO1_HUMAN	-0.719604					-0.850975			-0.216577
P24592	IGFBP6 IBP6	Insulin-like growth factor-binding protein 6 (IBP-6) (IGF-binding protein 6) (IGFBP-6)	IBP6_HUMAN	-0.411832	-0.451437	-0.440459	-0.184711	0.0351088		0.533866	-0.251989	0.236545
Q16270	IGFBP7 MAC25 PSF	Insulin-like growth factor-binding protein 7 (IBP-7) (IGF-binding protein 7) (IGFBP-7) (IGFBP-rP1) (MAC25 protein) (PGI2-stimulating factor) (Prostacyclin-stimulating factor) (Tumor-derived adhesion factor) (TAF)	IBP7_HUMAN	-0.900748	-0.48695	0.400323	-0.494842	-0.448027	-0.426208	0.602919	-0.0992823	0.249206
Q8WX77	IGFBPL1 IGFBPRP4	Insulin-like growth factor-binding protein-like 1 (IGFBP-related protein 10) (Insulin-like growth factor-binding-related protein 4) (IGFBP-rP4)	IBPL1_HUMAN		-0.825368						-0.0763445
P05362	ICAM1	Intercellular adhesion molecule 1 (ICAM-1) (Major group rhinovirus receptor) (CD antigen CD54)	ICAM1_HUMAN	-1.47998	0.0368782	0.648038	0.266415	0.0156768	-0.234951	-0.269653	0.158199	-0.0960201
P20591	MX1	Interferon-induced GTP-binding protein Mx1 (Interferon-induced protein p78) (IFI-78K) (Interferon-regulated resistance GTP-binding protein MxA) (Myxoma resistance protein 1) (Myxovirus resistance protein 1) [Cleaved into: Interferon-induced GTP-binding protein Mx1, N-terminally processed]	MX1_HUMAN		-1.37067		-1.41535	-1.35456	0.666874	-0.679733	-0.0138143
Q12905	ILF2 NF45 PRO3063	Interleukin enhancer-binding factor 2 (Nuclear factor of activated T-cells 45 kDa)	ILF2_HUMAN	-0.259157	-0.093006	-0.0492768	0.114128	-0.352852	-0.170111	-0.144353		-0.00901792
Q12906	ILF3 DRBF MPHOSPH4 NF90	Interleukin enhancer-binding factor 3 (Double-stranded RNA-binding protein 76) (DRBP76) (M-phase phosphoprotein 4) (MPP4) (Nuclear factor associated with dsRNA) (NFAR) (Nuclear factor of activated T-cells 90 kDa) (NF-AT-90) (Translational control protein 80) (TCP80)	ILF3_HUMAN	-0.702809		-0.716118	0.199666	-0.839723	-0.295929	-0.558545	0.472423	0.239368
O75874	IDH1 PICD	Isocitrate dehydrogenase [NADP] cytoplasmic (IDH) (EC 1.1.1.42) (Cytosolic NADP-isocitrate dehydrogenase) (IDP) (NADP(+)-specific ICDH) (Oxalosuccinate decarboxylase)	IDHC_HUMAN	0.163792	0.277992	0.259184	0.60361	0.0551416	-0.0131147	0.127178	-0.317353	-0.187849
Q92876	KLK6 PRSS18 PRSS9	Kallikrein-6 (EC 3.4.21.-) (Neurosin) (Protease M) (SP59) (Serine protease 18) (Serine protease 9) (Zyme)	KLK6_HUMAN	-1.44819	-1.14225				0.171797			0.242186
Q7Z4H8	KDELC2 UNQ1904/PRO4350	KDEL motif-containing protein 2	KDEL2_HUMAN	0.289205
Q86UP2	KTN1 CG1 KIAA0004	Kinectin (CG-1 antigen) (Kinesin receptor)	KTN1_HUMAN		0.276829	-0.410903		-0.0944781		-0.27477	-0.00548019
O43278	SPINT1 HAI1 UNQ223/PRO256	Kunitz-type protease inhibitor 1 (Hepatocyte growth factor activator inhibitor type 1) (HAI-1)	SPIT1_HUMAN						0.553217	0.103544		-0.139919
Q04760	GLO1	Lactoylglutathione lyase (EC 4.4.1.5) (Aldoketomutase) (Glyoxalase I) (Glx I) (Ketone-aldehyde mutase) (Methylglyoxalase) (S-D-lactoylglutathione methylglyoxal lyase)	LGUL_HUMAN	0.631397	0.287262	0.310168	0.152003	0.427696	0.325559	0.246579	0.189648	0.0405449
Q03252	LMNB2 LMN2	Lamin-B2	LMNB2_HUMAN	-0.756457	0.0133292	0.62521	0.386607	-0.157101	-0.163063	-0.56846		-0.173133
Q16787	LAMA3 LAMNA	Laminin subunit alpha-3 (Epiligrin 170 kDa subunit) (E170) (Epiligrin subunit alpha) (Kalinin subunit alpha) (Laminin-5 subunit alpha) (Laminin-6 subunit alpha) (Laminin-7 subunit alpha) (Nicein subunit alpha)	LAMA3_HUMAN	-0.946248	-0.387348	-0.537313	1.37657	-0.602015	0.285445	0.261533	-0.128073	0.194392
O15230	LAMA5 KIAA0533 KIAA1907	Laminin subunit alpha-5 (Laminin-10 subunit alpha) (Laminin-11 subunit alpha) (Laminin-15 subunit alpha)	LAMA5_HUMAN	0.336219	-0.436671	0.203099	-0.340196	-0.768586	-0.196569	0.605242	-0.165884	0.218057
P07942	LAMB1	Laminin subunit beta-1 (Laminin B1 chain) (Laminin-1 subunit beta) (Laminin-10 subunit beta) (Laminin-12 subunit beta) (Laminin-2 subunit beta) (Laminin-6 subunit beta) (Laminin-8 subunit beta)	LAMB1_HUMAN	0.415274	-0.333604	0.180729	-0.41514	-0.572968	0.169154	0.480449	-0.14923	0.0837564
Q13751	LAMB3 LAMNB1	Laminin subunit beta-3 (Epiligrin subunit bata) (Kalinin B1 chain) (Kalinin subunit beta) (Laminin B1k chain) (Laminin-5 subunit beta) (Nicein subunit beta)	LAMB3_HUMAN	-0.40492	-0.417342	-0.614543	1.35388	-0.828061	-0.29127	0.259174	-0.0206964	0.19381
P11047	LAMC1 LAMB2	Laminin subunit gamma-1 (Laminin B2 chain) (Laminin-1 subunit gamma) (Laminin-10 subunit gamma) (Laminin-11 subunit gamma) (Laminin-2 subunit gamma) (Laminin-3 subunit gamma) (Laminin-4 subunit gamma) (Laminin-6 subunit gamma) (Laminin-7 subunit gamma) (Laminin-8 subunit gamma) (Laminin-9 subunit gamma) (S-laminin subunit gamma) (S-LAM gamma)	LAMC1_HUMAN	0.448038	-0.43267	0.206025	-0.312613	-0.626829	-0.0253403	0.599427	-0.153334	0.156508
Q13753	LAMC2 LAMB2T LAMNB2	Laminin subunit gamma-2 (Cell-scattering factor 140 kDa subunit) (CSF 140 kDa subunit) (Epiligrin subunit gamma) (Kalinin subunit gamma) (Kalinin/nicein/epiligrin 100 kDa subunit) (Ladsin 140 kDa subunit) (Laminin B2t chain) (Laminin-5 subunit gamma) (Large adhesive scatter factor 140 kDa subunit) (Nicein subunit gamma)	LAMC2_HUMAN	1.80404	-0.298682	-0.0579328	1.2747	-0.328561	0.369714	0.304342	-0.0619213	0.146315
Q14767	LTBP2 C14orf141 LTBP3	Latent-transforming growth factor beta-binding protein 2 (LTBP-2)	LTBP2_HUMAN	-0.0432553	-0.617969	0.205409		-0.682779	-0.0278653			0.257586
Q9NS15	LTBP3	Latent-transforming growth factor beta-binding protein 3 (LTBP-3)	LTBP3_HUMAN	-0.506188				-0.443773	0.382447
Q99538	LGMN PRSC1	Legumain (EC 3.4.22.34) (Asparaginyl endopeptidase) (Protease, cysteine 1)	LGMN_HUMAN	0.97356	-0.192101	0.426966	-0.103794	0.171939	0.813245	0.444572	-0.22634	0.310899
P02750	LRG1 LRG	Leucine-rich alpha-2-glycoprotein (LRG)	A2GL_HUMAN	-2.97698		0.600846	1.98679	-0.898938	-1.01228	0.233874		-0.05359
P30740	SERPINB1 ELANH2 MNEI PI2	Leukocyte elastase inhibitor (LEI) (Monocyte/neutrophil elastase inhibitor) (EI) (M/NEI) (Peptidase inhibitor 2) (PI-2) (Serpin B1)	ILEU_HUMAN	-1.24263	-0.0963174	-0.173857	0.6465	0.16267	0.055916	-0.00814484	0.0466904	-0.16266
P09960	LTA4H LTA4	Leukotriene A-4 hydrolase (LTA-4 hydrolase) (EC 3.3.2.6) (Leukotriene A(4) hydrolase)	LKHA4_HUMAN	0.0197504		0.310168			-0.181311			0.218057
Q86X29	LSR LISCH	Lipolysis-stimulated lipoprotein receptor	LSR_HUMAN		-0.356341		-0.170098		0.156458		0.0380773	0.0700246
P00338	LDHA PIG19	L-lactate dehydrogenase A chain (LDH-A) (EC 1.1.1.27) (Cell proliferation-inducing gene 19 protein) (LDH muscle subunit) (LDH-M) (Renal carcinoma antigen NY-REN-59)	LDHA_HUMAN	0.818428	0.235522	-0.0335713	-1.21457	-0.178482	0.619256	-0.208394	0.0423903	0.293346
P07195	LDHB	L-lactate dehydrogenase B chain (LDH-B) (EC 1.1.1.27) (LDH heart subunit) (LDH-H) (Renal carcinoma antigen NY-REN-46)	LDHB_HUMAN	0.42118	0.228321	0.085938	0.535193	-0.737263	0.462583	-0.260106	0.0986977	0.29606
P01130	LDLR	Low-density lipoprotein receptor (LDL receptor)	LDLR_HUMAN	-0.60187	0.438457	1.33359	-0.570041	0.699913	0.741915	0.622547	-0.29143	-0.00767837
P05455	SSB	Lupus La protein (La autoantigen) (La ribonucleoprotein) (Sjoegren syndrome type B antigen) (SS-B)	LA_HUMAN	-0.173362	0.2745	-0.281896	0.452169	-0.485219	-0.152187	-0.280335	-0.025353	-0.317938
Q15046	KARS KIAA0070	Lysine--tRNA ligase (EC 6.1.1.6) (Lysyl-tRNA synthetase) (LysRS)	SYK_HUMAN			0.0879429
P10253	GAA	Lysosomal alpha-glucosidase (EC 3.2.1.20) (Acid maltase) (Aglucosidase alfa) [Cleaved into: 76 kDa lysosomal alpha-glucosidase; 70 kDa lysosomal alpha-glucosidase]	LYAG_HUMAN	-0.750337	-0.712969	-0.0239769	-0.260268	-0.769854	-0.792844	0.294298	-0.400964	0.100002
O00754	MAN2B1 LAMAN MANB	Lysosomal alpha-mannosidase (Laman) (EC 3.2.1.24) (Lysosomal acid alpha-mannosidase) (Mannosidase alpha class 2B member 1) (Mannosidase alpha-B) [Cleaved into: Lysosomal alpha-mannosidase A peptide; Lysosomal alpha-mannosidase B peptide; Lysosomal alpha-mannosidase C peptide; Lysosomal alpha-mannosidase D peptide; Lysosomal alpha-mannosidase E peptide]	MA2B1_HUMAN	-1.01986		-0.344733		-1.14966	-1.31616	0.55445		0.135141
P10619	CTSA PPGB	Lysosomal protective protein (EC 3.4.16.5) (Carboxypeptidase C) (Carboxypeptidase L) (Cathepsin A) (Protective protein cathepsin A) (PPCA) (Protective protein for beta-galactosidase) [Cleaved into: Lysosomal protective protein 32 kDa chain; Lysosomal protective protein 20 kDa chain]	PPGB_HUMAN	-0.300155	-0.087454	-0.666548	-0.136396	-0.676586	-0.540058	0.439373	-0.436134	0.278325
P42785	PRCP PCP	Lysosomal Pro-X carboxypeptidase (EC 3.4.16.2) (Angiotensinase C) (Lysosomal carboxypeptidase C) (Proline carboxypeptidase) (Prolylcarboxypeptidase) (PRCP)	PCP_HUMAN	1.24061	-0.770236	-0.0947903	-0.165087		-0.846808	0.812466	-0.196557	0.183292
Q96C86	DCPS DCS1 HINT5 HSPC015	m7GpppX diphosphatase (EC 3.6.1.59) (DCS-1) (Decapping scavenger enzyme) (Hint-related 7meGMP-directed hydrolase) (Histidine triad nucleotide-binding protein 5) (Histidine triad protein member 5) (HINT-5) (Scavenger mRNA-decapping enzyme DcpS)	DCPS_HUMAN	0.204082	0.165612	0.177751	-0.181567	0.13043	0.14828	-0.148652	-0.234317	-0.216964
P09603	CSF1	Macrophage colony-stimulating factor 1 (CSF-1) (M-CSF) (MCSF) (Lanimostim) [Cleaved into: Processed macrophage colony-stimulating factor 1]	CSF1_HUMAN	-1.94382		1.01061		-0.669236	-1.14962	0.0866837
P14174	MIF GLIF MMIF	Macrophage migration inhibitory factor (MIF) (EC 5.3.2.1) (Glycosylation-inhibiting factor) (GIF) (L-dopachrome isomerase) (L-dopachrome tautomerase) (EC 5.3.3.12) (Phenylpyruvate tautomerase)	MIF_HUMAN	0.357317	0.341667	-0.196249	0.352071	0.252787	0.267709	0.0858521	0.0285431	0.125711
P40121	CAPG AFCP MCP	Macrophage-capping protein (Actin regulatory protein CAP-G)	CAPG_HUMAN	-0.127642			0.4656		-0.0940572	0.026591		0.189437
Q14764	MVP LRP	Major vault protein (MVP) (Lung resistance-related protein)	MVP_HUMAN			-0.519398
P40925	MDH1 MDHA	Malate dehydrogenase, cytoplasmic (EC 1.1.1.37) (Cytosolic malate dehydrogenase) (Diiodophenylpyruvate reductase) (EC 1.1.1.96)	MDHC_HUMAN	-0.0335303	-0.0163018	-0.15615	0.311739	0.0281259	-0.126162	0.0813533	0.0651776	0.0201686
P40926	MDH2	Malate dehydrogenase, mitochondrial (EC 1.1.1.37)	MDHM_HUMAN	0.212279	-0.0408877	0.214461	-0.705217	0.453987	-0.201122	0.072985	0.100078	-0.345594
P09237	MMP7 MPSL1 PUMP1	Matrilysin (EC 3.4.24.23) (Matrin) (Matrix metalloproteinase-7) (MMP-7) (Pump-1 protease) (Uterine metalloproteinase)	MMP7_HUMAN	-4.11347		-0.301445		0.309083	-1.66812	0.809447		-0.120244
P14780	MMP9 CLG4B	Matrix metalloproteinase-9 (MMP-9) (EC 3.4.24.35) (92 kDa gelatinase) (92 kDa type IV collagenase) (Gelatinase B) (GELB) [Cleaved into: 67 kDa matrix metalloproteinase-9; 82 kDa matrix metalloproteinase-9]	MMP9_HUMAN			0.936515		4.05532	2.96339
P55145	MANF ARMET ARP	Mesencephalic astrocyte-derived neurotrophic factor (Arginine-rich protein) (Protein ARMET)	MANF_HUMAN			0.0926102		-0.0816751	0.0617861
P01033	TIMP1 CLGI TIMP	Metalloproteinase inhibitor 1 (Erythroid-potentiating activity) (EPA) (Fibroblast collagenase inhibitor) (Collagenase inhibitor) (Tissue inhibitor of metalloproteinases 1) (TIMP-1)	TIMP1_HUMAN	0.575303	0.101367	0.436176	-0.319315	1.14664	1.54927	0.456202	-0.197235	0.116988
P16035	TIMP2	Metalloproteinase inhibitor 2 (CSC-21K) (Tissue inhibitor of metalloproteinases 2) (TIMP-2)	TIMP2_HUMAN	-1.00712	-0.375414	-0.0683146	-0.241959	-0.185736	-0.479128	0.53995	-0.165884	0.174911
Q9NZL9	MAT2B TGR MSTP045 Nbla02999 UNQ2435/PRO4995	Methionine adenosyltransferase 2 subunit beta (Methionine adenosyltransferase II beta) (MAT II beta) (Putative dTDP-4-keto-6-deoxy-D-glucose 4-reductase)	MAT2B_HUMAN	-0.34616		0.16736			-0.550911	0.127663		-0.298152
P21741	MDK MK1 NEGF2	Midkine (MK) (Amphiregulin-associated protein) (ARAP) (Midgestation and kidney protein) (Neurite outgrowth-promoting factor 2) (Neurite outgrowth-promoting protein)	MK_HUMAN	-1.03111	-0.0694452	0.53746	-0.207445	-0.415335	0.407582	0.216959	-0.517385	-0.0790387
P28482	MAPK1 ERK2 PRKM1 PRKM2	Mitogen-activated protein kinase 1 (MAP kinase 1) (MAPK 1) (EC 2.7.11.24) (ERT1) (Extracellular signal-regulated kinase 2) (ERK-2) (MAP kinase isoform p42) (p42-MAPK) (Mitogen-activated protein kinase 2) (MAP kinase 2) (MAPK 2)	MK01_HUMAN			0.0431783
P26038	MSN	Moesin (Membrane-organizing extension spike protein)	MOES_HUMAN	0.36469	0.166868	-0.140026	0.317923	0.402042	0.232977	0.0109056	0.134153	0.0351934
P08571	CD14	Monocyte differentiation antigen CD14 (Myeloid cell-specific leucine-rich glycoprotein) (CD antigen CD14) [Cleaved into: Monocyte differentiation antigen CD14, urinary form; Monocyte differentiation antigen CD14, membrane-bound form]	CD14_HUMAN	-3.50278				-0.997029	-0.663668			-0.212328
P22234	PAICS ADE2 AIRC PAIS	Multifunctional protein ADE2 [Includes: Phosphoribosylaminoimidazole-succinocarboxamide synthase (EC 6.3.2.6) (SAICAR synthetase); Phosphoribosylaminoimidazole carboxylase (EC 4.1.1.21) (AIR carboxylase) (AIRC)]	PUR6_HUMAN	1.97958	0.0841839	0.334297		0.325789	1.46618		-0.147264
Q969H8	MYDGF C19orf10 IL25	Myeloid-derived growth factor (MYDGF) (Interleukin-25) (IL-25) (Stromal cell-derived growth factor SF20)	MYDGF_HUMAN		-0.238742				0.505123		0.201267
P60660	MYL6	Myosin light polypeptide 6 (17 kDa myosin light chain) (LC17) (Myosin light chain 3) (MLC-3) (Myosin light chain alkali 3) (Myosin light chain A3) (Smooth muscle and nonmuscle myosin light chain alkali 6)	MYL6_HUMAN	0.107186		-0.0919505		-0.0474643	0.0828477	-0.332516	-0.0942235	0.138623
P35579	MYH9	Myosin-9 (Cellular myosin heavy chain, type A) (Myosin heavy chain 9) (Myosin heavy chain, non-muscle IIa) (Non-muscle myosin heavy chain A) (NMMHC-A) (Non-muscle myosin heavy chain IIa) (NMMHC II-a) (NMMHC-IIA)	MYH9_HUMAN		-0.0940588	0.239478	-0.333008	0.242769			-0.116488
P58546	MTPN	Myotrophin (Protein V-1)	MTPN_HUMAN	0.0738349	0.431157	-0.0866645			0.224516
O94760	DDAH1 DDAH	N(G),N(G)-dimethylarginine dimethylaminohydrolase 1 (DDAH-1) (Dimethylarginine dimethylaminohydrolase 1) (EC 3.5.3.18) (DDAHI) (Dimethylargininase-1)	DDAH1_HUMAN	-0.146909				-0.308717	-0.812446			-0.247272
P15586	GNS	N-acetylglucosamine-6-sulfatase (EC 3.1.6.14) (Glucosamine-6-sulfatase) (G6S)	GNS_HUMAN	0.0335399	0.320377	-0.638377	-0.237418	-0.234063	-1.01562	0.314316	0.0220061	0.146315
Q8NCW5	NAXE AIBP APOA1BP YJEFN1	NAD(P)H-hydrate epimerase (EC 5.1.99.6) (Apolipoprotein A-I-binding protein) (AI-BP) (NAD(P)HX epimerase) (YjeF N-terminal domain-containing protein 1) (YjeF_N1)	NNRE_HUMAN	0.133898	0.233126	0.00212787	-0.00308005	0.179837	0.0756522	0.190436		-0.115907
P48163	ME1	NADP-dependent malic enzyme (NADP-ME) (EC 1.1.1.40) (Malic enzyme 1)	MAOX_HUMAN	0.835333
Q13765	NACA HSD48	Nascent polypeptide-associated complex subunit alpha (NAC-alpha) (Alpha-NAC) (allergen Hom s 2)	NACA_HUMAN	-0.0221064	-0.283677	-0.275224		-0.16675		-0.556726	0.0160244	0.206418
Q15223	NECTIN1 HVEC PRR1 PVRL1	Nectin-1 (Herpes virus entry mediator C) (Herpesvirus entry mediator C) (HveC) (Herpesvirus Ig-like receptor) (HIgR) (Nectin cell adhesion molecule 1) (Poliovirus receptor-related protein 1) (CD antigen CD111)	NECT1_HUMAN		-0.402174
Q15843	NEDD8	NEDD8 (Neddylin) (Neural precursor cell expressed developmentally down-regulated protein 8) (NEDD-8) (Ubiquitin-like protein Nedd8)	NEDD8_HUMAN		-0.0975234	-0.203792		0.0679656
Q14697	GANAB G2AN KIAA0088	Neutral alpha-glucosidase AB (EC 3.2.1.84) (Alpha-glucosidase 2) (Glucosidase II subunit alpha)	GANAB_HUMAN	0.628338	0.262799	0.346909		-0.786429	0.143201	-0.397081	0.359429
P80188	LCN2 HNL NGAL	Neutrophil gelatinase-associated lipocalin (NGAL) (25 kDa alpha-2-microglobulin-related subunit of MMP-9) (Lipocalin-2) (Oncogene 24p3) (Siderocalin LCN2) (p25)	NGAL_HUMAN	-4.57769	0.362648	0.990207	1.18215	0.638194	-0.228354	0.406449	0.0126579	-0.112844
P43490	NAMPT PBEF PBEF1	Nicotinamide phosphoribosyltransferase (NAmPRTase) (Nampt) (EC 2.4.2.12) (Pre-B-cell colony-enhancing factor 1) (Pre-B cell-enhancing factor) (Visfatin)	NAMPT_HUMAN			0.023934		1.22061	1.92626	0.0659179		0.33089
Q6XQN6	NAPRT FHIP NAPRT1	Nicotinate phosphoribosyltransferase (NAPRTase) (EC 6.3.4.21) (FHA-HIT-interacting protein) (Nicotinate phosphoribosyltransferase domain-containing protein 1)	PNCB_HUMAN			0.00195067			0.531658	-0.257994
Q9GZT8	NIF3L1 ALS2CR1 MDS015 My018	NIF3-like protein 1 (Amyotrophic lateral sclerosis 2 chromosomal region candidate gene 1 protein)	NIF3L_HUMAN					0.303069	0.0625775
Q9BZM5	ULBP2 N2DL2 RAET1H UNQ463/PRO791	NKG2D ligand 2 (N2DL-2) (NKG2DL2) (ALCAN-alpha) (Retinoic acid early transcript 1H) (UL16-binding protein 2)	N2DL2_HUMAN			0.872047
Q13287	NMI	N-myc-interactor (Nmi) (N-myc and STAT interactor)	NMI_HUMAN						-0.0298885
Q9Y266	NUDC	Nuclear migration protein nudC (Nuclear distribution protein C homolog)	NUDC_HUMAN	0.955769	0.173132			0.408779	0.745862	0.115328		0.190604
Q14980	NUMA1 NMP22 NUMA	Nuclear mitotic apparatus protein 1 (NuMA protein) (Nuclear matrix protein-22) (NMP-22) (SP-H antigen)	NUMA1_HUMAN	-0.209222		0.878818		0.379358	-0.163618			0.333535
P61970	NUTF2 NTF2	Nuclear transport factor 2 (NTF-2) (Placental protein 15) (PP15)	NTF2_HUMAN	0.537744	0.142812	-0.165274	0.226211	0.191604	0.167536	0.227101	-0.108178	0.0654182
P67809	YBX1 NSEP1 YB1	Nuclease-sensitive element-binding protein 1 (CCAAT-binding transcription factor I subunit A) (CBF-A) (DNA-binding protein B) (DBPB) (Enhancer factor I subunit A) (EFI-A) (Y-box transcription factor) (Y-box-binding protein 1) (YB-1)	YBOX1_HUMAN		0.0272281	-0.314406	0.104143	0.257771	0.435955	-0.533284	0.0580952
Q02818	NUCB1 NUC	Nucleobindin-1 (CALNUC)	NUCB1_HUMAN	-0.894867		0.232699	0.65727	-0.732314	-0.0378401	0.0260709		-0.0377814
P19338	NCL	Nucleolin (Protein C23)	NUCL_HUMAN	0.00771286	-0.0528277	0.0392118	-0.384694	0.13043	0.160308	-0.262011	0.119259	-0.205977
P06748	NPM1 NPM	Nucleophosmin (NPM) (Nucleolar phosphoprotein B23) (Nucleolar protein NO38) (Numatrin)	NPM_HUMAN	0.476675	-0.202607	0.184325	-0.0711049	0.509359	0.207442	-0.181514	-0.00281155	-0.249052
P12270	TPR	Nucleoprotein TPR (Megator) (NPC-associated intranuclear protein) (Translocated promoter region protein)	TPR_HUMAN	-0.298601		-0.0393953		-0.366591		-0.297375
P15531	NME1 NDPKA NM23	Nucleoside diphosphate kinase A (NDK A) (NDP kinase A) (EC 2.7.4.6) (Granzyme A-activated DNase) (GAAD) (Metastasis inhibition factor nm23) (NM23-H1) (Tumor metastatic process-associated protein)	NDKA_HUMAN	0.891712	0.0505532	0.0990861	0.0440864	0.496768	0.406335	0.142615	0.0848255	0.128912
P22392	NME2 NM23B	Nucleoside diphosphate kinase B (NDK B) (NDP kinase B) (EC 2.7.4.6) (C-myc purine-binding transcription factor PUF) (Histidine protein kinase NDKB) (EC 2.7.13.3) (nm23-H2)	NDKB_HUMAN	0.949244	0.0532727	0.110637	0.055826	0.552582	0.415037	0.187338	0.0848255	0.131498
Q9NTK5	OLA1 GTPBP9 PRO2455 PTD004	Obg-like ATPase 1 (DNA damage-regulated overexpressed in cancer 45) (DOC45) (GTP-binding protein 9)	OLA1_HUMAN	0.634451	-0.126313	0.108334	0.122631	0.382783	0.030415	0.0462174	-0.0230979	-0.0265462
P50897	PPT1 CLN1 PPT	Palmitoyl-protein thioesterase 1 (PPT-1) (EC 3.1.2.22) (Palmitoyl-protein hydrolase 1)	PPT1_HUMAN	0.388999		-0.00551157	-0.0885016	-0.240549	-0.232037			0.33881
O00151	PDLIM1 CLIM1 CLP36	PDZ and LIM domain protein 1 (C-terminal LIM domain protein 1) (Elfin) (LIM domain protein CLP-36)	PDLI1_HUMAN						-0.824394	-0.368307
P62937	PPIA CYPA	Peptidyl-prolyl cis-trans isomerase A (PPIase A) (EC 5.2.1.8) (Cyclophilin A) (Cyclosporin A-binding protein) (Rotamase A) [Cleaved into: Peptidyl-prolyl cis-trans isomerase A, N-terminally processed]	PPIA_HUMAN	0.303343	0.51048	0.024283	0.684327	0.461566	0.0492236	0.182368	0.00884278	-0.15504
P23284	PPIB CYPB	Peptidyl-prolyl cis-trans isomerase B (PPIase B) (EC 5.2.1.8) (CYP-S1) (Cyclophilin B) (Rotamase B) (S-cyclophilin) (SCYLP)	PPIB_HUMAN	-0.247868	0.0464643	0.212931	0.333878	-0.0669584	0.197388	0.00511126	0.293412	-0.116088
P30405	PPIF CYP3	Peptidyl-prolyl cis-trans isomerase F, mitochondrial (PPIase F) (EC 5.2.1.8) (Cyclophilin D) (CyP-D) (CypD) (Cyclophilin F) (Mitochondrial cyclophilin) (CyP-M) (Rotamase F)	PPIF_HUMAN	0.363464	0.578133			1.10439	0.157051			-0.335266
P62942	FKBP1A FKBP1 FKBP12	Peptidyl-prolyl cis-trans isomerase FKBP1A (PPIase FKBP1A) (EC 5.2.1.8) (12 kDa FK506-binding protein) (12 kDa FKBP) (FKBP-12) (Calstabin-1) (FK506-binding protein 1A) (FKBP-1A) (Immunophilin FKBP12) (Rotamase)	FKB1A_HUMAN	0	0.144088	-0.168262	0.353276	0.425483	-0.0687047	0.204602	0.0595145	-0.0771057
P26885	FKBP2 FKBP13	Peptidyl-prolyl cis-trans isomerase FKBP2 (PPIase FKBP2) (EC 5.2.1.8) (13 kDa FK506-binding protein) (13 kDa FKBP) (FKBP-13) (FK506-binding protein 2) (FKBP-2) (Immunophilin FKBP13) (Rotamase)	FKBP2_HUMAN		-0.146298	0.05672		-0.320368		-0.13153		-0.274198
Q00688	FKBP3 FKBP25	Peptidyl-prolyl cis-trans isomerase FKBP3 (PPIase FKBP3) (EC 5.2.1.8) (25 kDa FK506-binding protein) (25 kDa FKBP) (FKBP-25) (FK506-binding protein 3) (FKBP-3) (Immunophilin FKBP25) (Rapamycin-selective 25 kDa immunophilin) (Rotamase)	FKBP3_HUMAN	0.0102224		-0.389824	-0.206912	-0.381623	-0.44251	-0.300416	0.0167552	0.0229568
Q02790	FKBP4 FKBP52	Peptidyl-prolyl cis-trans isomerase FKBP4 (PPIase FKBP4) (EC 5.2.1.8) (51 kDa FK506-binding protein) (FKBP51) (52 kDa FK506-binding protein) (52 kDa FKBP) (FKBP-52) (59 kDa immunophilin) (p59) (FK506-binding protein 4) (FKBP-4) (FKBP59) (HSP-binding immunophilin) (HBI) (Immunophilin FKBP52) (Rotamase) [Cleaved into: Peptidyl-prolyl cis-trans isomerase FKBP4, N-terminally processed]	FKBP4_HUMAN	1.06767	0.246257	0.294049	-0.634732	0.0253525	0.837492	-0.0650054	-0.280076	0.169592
Q92626	PXDN KIAA0230 MG50 PRG2 VPO VPO1	Peroxidasin homolog (EC 1.11.1.7) (Melanoma-associated antigen MG50) (Vascular peroxidase 1) (p53-responsive gene 2 protein)	PXDN_HUMAN		-0.39215	0.196146	0.0649729	-0.699585	0.294905	0.255185		0.301474
Q06830	PRDX1 PAGA PAGB TDPX2	Peroxiredoxin-1 (EC 1.11.1.15) (Natural killer cell-enhancing factor A) (NKEF-A) (Proliferation-associated gene protein) (PAG) (Thioredoxin peroxidase 2) (Thioredoxin-dependent peroxide reductase 2)	PRDX1_HUMAN	0.813048	0.0119319	0.0534747	0.131084	0.413252	0.239991	0.104365	-0.116167	0.159194
P32119	PRDX2 NKEFB TDPX1	Peroxiredoxin-2 (EC 1.11.1.15) (Natural killer cell-enhancing factor B) (NKEF-B) (PRP) (Thiol-specific antioxidant protein) (TSA) (Thioredoxin peroxidase 1) (Thioredoxin-dependent peroxide reductase 1)	PRDX2_HUMAN	0.549654	0.0801894	-0.00301986	0.142279	0.16267	0.142303	0.0319545	0.0481209	0.225196
Q13162	PRDX4	Peroxiredoxin-4 (EC 1.11.1.15) (Antioxidant enzyme AOE372) (AOE37-2) (Peroxiredoxin IV) (Prx-IV) (Thioredoxin peroxidase AO372) (Thioredoxin-dependent peroxide reductase A0372)	PRDX4_HUMAN	0.268391	0.0286106	0.229372	0.18891	0.18246	0.134195	-0.107554	0.0959339	-0.0938865
P30044	PRDX5 ACR1 SBBI10	Peroxiredoxin-5, mitochondrial (EC 1.11.1.15) (Alu corepressor 1) (Antioxidant enzyme B166) (AOEB166) (Liver tissue 2D-page spot 71B) (PLP) (Peroxiredoxin V) (Prx-V) (Peroxisomal antioxidant enzyme) (TPx type VI) (Thioredoxin peroxidase PMP20) (Thioredoxin reductase)	PRDX5_HUMAN	-0.0749894		-0.0887389			0.0594092			-0.145065
P30041	PRDX6 AOP2 KIAA0106	Peroxiredoxin-6 (EC 1.11.1.15) (1-Cys peroxiredoxin) (1-Cys PRX) (24 kDa protein) (Acidic calcium-independent phospholipase A2) (aiPLA2) (EC 3.1.1.-) (Antioxidant protein 2) (Liver 2D page spot 40) (Non-selenium glutathione peroxidase) (NSGPx) (EC 1.11.1.9) (Red blood cells page spot 12)	PRDX6_HUMAN	0.874598	-0.322457	-0.313744		0.240253
P30086	PEBP1 PBP PEBP	Phosphatidylethanolamine-binding protein 1 (PEBP-1) (HCNPpp) (Neuropolypeptide h3) (Prostatic-binding protein) (Raf kinase inhibitor protein) (RKIP) [Cleaved into: Hippocampal cholinergic neurostimulating peptide (HCNP)]	PEBP1_HUMAN	0.169416	-0.286425	-0.452792	-0.0808342	-0.0771188	-0.323375	0.176599	0.0552524	0.022629
P36871	PGM1	Phosphoglucomutase-1 (PGM 1) (EC 5.4.2.2) (Glucose phosphomutase 1)	PGM1_HUMAN	-0.133689		0.029856		0.344648	-0.058515	-0.0231377		0.10326
Q96G03	PGM2 MSTP006	Phosphoglucomutase-2 (PGM 2) (EC 5.4.2.2) (Glucose phosphomutase 2) (Phosphodeoxyribomutase) (Phosphopentomutase) (EC 5.4.2.7)	PGM2_HUMAN	-1.12025		0.0778904	0.595488	-0.553414	-0.687689	0.0119566		-0.0549729
P00558	PGK1 PGKA MIG10 OK/SW-cl.110	Phosphoglycerate kinase 1 (EC 2.7.2.3) (Cell migration-inducing gene 10 protein) (Primer recognition protein 2) (PRP 2)	PGK1_HUMAN	0.30845	0.687205	0.186666	0.754397	0.450727	0.217426	0.102229	0.117897	-0.195264
P18669	PGAM1 PGAMA CDABP0006	Phosphoglycerate mutase 1 (EC 5.4.2.11) (EC 5.4.2.4) (BPG-dependent PGAM 1) (Phosphoglycerate mutase isozyme B) (PGAM-B)	PGAM1_HUMAN	0.365916	0.0828537	0.0758715	0.115548	0.363264	0.181301	0.131375	-0.00414525	-0.0260376
O15067	PFAS KIAA0361	Phosphoribosylformylglycinamidine synthase (FGAM synthase) (FGAMS) (EC 6.3.5.3) (Formylglycinamide ribonucleotide amidotransferase) (FGAR amidotransferase) (FGAR-AT) (Formylglycinamide ribotide amidotransferase)	PUR4_HUMAN	1.27493		0.0647166		0.504126	0.738947
Q9Y617	PSAT1 PSA	Phosphoserine aminotransferase (EC 2.6.1.52) (Phosphohydroxythreonine aminotransferase) (PSAT)	SERC_HUMAN	0.493588	0.771369	0.234359		0.218691	0.171797	-0.230596		-0.181794
P78330	PSPH	Phosphoserine phosphatase (PSP) (PSPase) (EC 3.1.3.3) (L-3-phosphoserine phosphatase) (O-phosphoserine phosphohydrolase)	SERB_HUMAN	0.225838
Q9BTY2	FUCA2 PSEC0151 UNQ227/PRO260	Plasma alpha-L-fucosidase (EC 3.2.1.51) (Alpha-L-fucoside fucohydrolase 2) (Alpha-L-fucosidase 2)	FUCO2_HUMAN	0.0551199	0.0189048	0.602015	-0.23452	0.150664	0.548705	0.572372	-0.150542	0.193955
Q14651	PLS1	Plastin-1 (Intestine-specific plastin) (I-plastin)	PLSI_HUMAN					0.119521
P13796	LCP1 PLS2	Plastin-2 (L-plastin) (LC64P) (Lymphocyte cytosolic protein 1) (LCP-1)	PLSL_HUMAN					0.115409
P13797	PLS3	Plastin-3 (T-plastin)	PLST_HUMAN	0.0844424	-0.176087	-0.567238	-0.451072	0.0311851	-0.722987	0.159786	-0.0416941	0.04507
Q15149	PLEC PLEC1	Plectin (PCN) (PLTN) (Hemidesmosomal protein 1) (HD1) (Plectin-1)	PLEC_HUMAN	-0.409734	0.0748461	-0.0653408	0.0671771	-0.703938	-0.620091	-0.246637	-0.158605	-0.27702
Q9NX46	ADPRHL2 ARH3	Poly(ADP-ribose) glycohydrolase ARH3 (EC 3.2.1.143) (ADP-ribosylhydrolase 3) ([Protein ADP-ribosylarginine] hydrolase-like protein 2)	ARHL2_HUMAN						-0.151452
P11940	PABPC1 PAB1 PABP1 PABPC2	Polyadenylate-binding protein 1 (PABP-1) (Poly(A)-binding protein 1)	PABP1_HUMAN			-0.0724137		-0.586078		-0.529456		0.580628
Q13310	PABPC4 APP1 PABP4	Polyadenylate-binding protein 4 (PABP-4) (Poly(A)-binding protein 4) (Activated-platelet protein 1) (APP-1) (Inducible poly(A)-binding protein) (iPABP)	PABP4_HUMAN					-0.562389
Q10471	GALNT2	Polypeptide N-acetylgalactosaminyltransferase 2 (EC 2.4.1.41) (Polypeptide GalNAc transferase 2) (GalNAc-T2) (pp-GaNTase 2) (Protein-UDP acetylgalactosaminyltransferase 2) (UDP-GalNAc:polypeptide N-acetylgalactosaminyltransferase 2) [Cleaved into: Polypeptide N-acetylgalactosaminyltransferase 2 soluble form]	GALT2_HUMAN			0.527645	-0.234158			0.568805	-0.337385
P08397	HMBS PBGD UPS	Porphobilinogen deaminase (PBG-D) (EC 2.5.1.61) (Hydroxymethylbilane synthase) (HMBS) (Pre-uroporphyrinogen synthase)	HEM3_HUMAN	0.761844
Q9UHV9	PFDN2 PFD2 HSPC231	Prefoldin subunit 2	PFD2_HUMAN						0.373545			-0.303484
P61758	VBP1 PFDN3	Prefoldin subunit 3 (HIBBJ46) (Von Hippel-Lindau-binding protein 1) (VBP-1) (VHL-binding protein 1)	PFD3_HUMAN					0.487253
Q9NQP4	PFDN4 PFD4	Prefoldin subunit 4 (Protein C-1)	PFD4_HUMAN		0.107922	-0.0312121		0.330527		-0.0263709	0.0481209
P02545	LMNA LMN1	Prelamin-A/C [Cleaved into: Lamin-A/C (70 kDa lamin) (Renal carcinoma antigen NY-REN-32)]	LMNA_HUMAN	0.191698	0.132562	0.0817522	0.114128	-0.828853	-0.188261	-0.459321	0.083431	-0.300201
Q9UMS4	PRPF19 NMP200 PRP19 SNEV	Pre-mRNA-processing factor 19 (EC 2.3.2.27) (Nuclear matrix protein 200) (PRP19/PSO4 homolog) (hPso4) (RING-type E3 ubiquitin transferase PRP19) (Senescence evasion factor)	PRP19_HUMAN	0.123649		0.496538
Q9H3G5	CPVL VLP PSEC0124 UNQ197/PRO223	Probable serine carboxypeptidase CPVL (EC 3.4.16.-) (Carboxypeptidase, vitellogenic-like) (Vitellogenic carboxypeptidase-like protein) (VCP-like protein) (hVLP)	CPVL_HUMAN	2.23022		1.50031	2.33997				-0.240417
P09668	CTSH CPSB	Pro-cathepsin H [Cleaved into: Cathepsin H mini chain; Cathepsin H (EC 3.4.22.16); Cathepsin H heavy chain; Cathepsin H light chain]	CATH_HUMAN	-1.306	-0.475733	0.220261	-0.643837	-0.975524	-0.648045	0.646432	-0.167045	0.264532
Q02809	PLOD1 LLH PLOD	Procollagen-lysine,2-oxoglutarate 5-dioxygenase 1 (EC 1.14.11.4) (Lysyl hydroxylase 1) (LH1)	PLOD1_HUMAN		-0.327754	0.282715	-0.0461114
O60568	PLOD3	Procollagen-lysine,2-oxoglutarate 5-dioxygenase 3 (EC 1.14.11.4) (Lysyl hydroxylase 3) (LH3)	PLOD3_HUMAN	0.828239		0.401667		0.631491			0.147561	0.0596792
P07737	PFN1	Profilin-1 (Epididymis tissue protein Li 184a) (Profilin I)	PROF1_HUMAN	0.395013	0.114447	-0.00979309	0.118385	0.546486	0.391294	0.233123	0.0580952	0.109909
P12004	PCNA	Proliferating cell nuclear antigen (PCNA) (Cyclin)	PCNA_HUMAN	0.30845	-0.00494195	0.509062	-0.134706	0.292181	0.740926	-0.0233172	0.0651776	0.276951
Q9UQ80	PA2G4 EBP1	Proliferation-associated protein 2G4 (Cell cycle protein p38-2G4 homolog) (hG4-1) (ErbB3-binding protein 1)	PA2G4_HUMAN	1.06164	0.290723	0.31873	-0.045	0.500978	0.815125	0.131536	-0.0888679	-0.0788629
P48147	PREP PEP	Prolyl endopeptidase (PE) (EC 3.4.21.26) (Post-proline cleaving enzyme)	PPCE_HUMAN	0.255227	0.128699				-0.0924706
Q8NBP7	PCSK9 NARC1 PSEC0052	Proprotein convertase subtilisin/kexin type 9 (EC 3.4.21.-) (Neural apoptosis-regulated convertase 1) (NARC-1) (Proprotein convertase 9) (PC9) (Subtilisin/kexin-like protease PC9)	PCSK9_HUMAN	0.768345	-0.322104	1.4686	0.108431	-0.336988	-0.149435	0.649812	-0.249527	0.0777747
P07602	PSAP GLBA SAP1	Prosaposin (Proactivator polypeptide) [Cleaved into: Saposin-A (Protein A); Saposin-B-Val; Saposin-B (Cerebroside sulfate activator) (CSAct) (Dispersin) (Sphingolipid activator protein 1) (SAP-1) (Sulfatide/GM1 activator); Saposin-C (A1 activator) (Co-beta-glucosidase) (Glucosylceramidase activator) (Sphingolipid activator protein 2) (SAP-2); Saposin-D (Component C) (Protein C)]	SAP_HUMAN	-0.892521	-0.345017	-0.799833	0.146454	-1.24407	-1.1729	0.165622	-0.0861976	0.237957
Q15185	PTGES3 P23 TEBP	Prostaglandin E synthase 3 (EC 5.3.99.3) (Cytosolic prostaglandin E2 synthase) (cPGES) (Hsp90 co-chaperone) (Progesterone receptor complex p23) (Telomerase-binding protein p23)	TEBP_HUMAN	1.6701	0.918822			1.51301
Q06323	PSME1 IFI5111	Proteasome activator complex subunit 1 (11S regulator complex subunit alpha) (REG-alpha) (Activator of multicatalytic protease subunit 1) (Interferon gamma up-regulated I-5111 protein) (IGUP I-5111) (Proteasome activator 28 subunit alpha) (PA28a) (PA28alpha)	PSME1_HUMAN	-0.209222	-0.126005	-0.25137		-0.440339	0.197388	-0.430243		0.258978
Q9UL46	PSME2	Proteasome activator complex subunit 2 (11S regulator complex subunit beta) (REG-beta) (Activator of multicatalytic protease subunit 2) (Proteasome activator 28 subunit beta) (PA28b) (PA28beta)	PSME2_HUMAN	0.199965		-0.196859		-0.487927	0.467372
P25786	PSMA1 HC2 NU PROS30 PSC2	Proteasome subunit alpha type-1 (EC 3.4.25.1) (30 kDa prosomal protein) (PROS-30) (Macropain subunit C2) (Multicatalytic endopeptidase complex subunit C2) (Proteasome component C2) (Proteasome nu chain)	PSA1_HUMAN	-0.0999754	0.00773188	0.00602083	-0.0148446	0.0285633	0.0342932	0.0499745	0.082035	-0.0148931
P25787	PSMA2 HC3 PSC3	Proteasome subunit alpha type-2 (EC 3.4.25.1) (Macropain subunit C3) (Multicatalytic endopeptidase complex subunit C3) (Proteasome component C3)	PSA2_HUMAN	-0.216538	-0.1348	-0.149442	-0.0935813	0.0594289	0.0299295	-0.0618689	0.0243338	-0.00433492
P25788	PSMA3 HC8 PSC8	Proteasome subunit alpha type-3 (EC 3.4.25.1) (Macropain subunit C8) (Multicatalytic endopeptidase complex subunit C8) (Proteasome component C8)	PSA3_HUMAN	-0.173896	-0.0880532	-0.0412201	0.0635015	-0.0155484	-0.00612751	0.050827	0.147561	0.012267
P25789	PSMA4 HC9 PSC9	Proteasome subunit alpha type-4 (EC 3.4.25.1) (Macropain subunit C9) (Multicatalytic endopeptidase complex subunit C9) (Proteasome component C9) (Proteasome subunit L)	PSA4_HUMAN	-0.168742	0.000704613	-0.0645982	0.00138388	0.0565721	0.00445506	-0.0222409	0.0595145	0.0106154
P28066	PSMA5	Proteasome subunit alpha type-5 (EC 3.4.25.1) (Macropain zeta chain) (Multicatalytic endopeptidase complex zeta chain) (Proteasome zeta chain)	PSA5_HUMAN	-0.204122	-0.0597162	-0.140221	-0.0635291	0.0106669	-0.0109484	-0.00743476	0.163488	-0.0577427
P60900	PSMA6 PROS27	Proteasome subunit alpha type-6 (EC 3.4.25.1) (27 kDa prosomal protein) (PROS-27) (p27K) (Macropain iota chain) (Multicatalytic endopeptidase complex iota chain) (Proteasome iota chain)	PSA6_HUMAN	-0.120246	-0.0120314	-0.0645982	0	0.0608552	0.0193697	0.0302265	0.143552	-0.0558379
O14818	PSMA7 HSPC	Proteasome subunit alpha type-7 (EC 3.4.25.1) (Proteasome subunit RC6-1) (Proteasome subunit XAPC7)	PSA7_HUMAN	-0.111012	0.00492508	-0.087607	0.0984071	0.0358343	0.0276616	-0.00406667	0.11517	0.0371417
P20618	PSMB1 PSC5	Proteasome subunit beta type-1 (EC 3.4.25.1) (Macropain subunit C5) (Multicatalytic endopeptidase complex subunit C5) (Proteasome component C5) (Proteasome gamma chain)	PSB1_HUMAN	-0.0601042	-0.0694452	-0.0590416	-0.020607	0.0494052	0.0368729	0.0649055	0.112438	0.00780331
P40306	PSMB10 LMP10 MECL1	Proteasome subunit beta type-10 (EC 3.4.25.1) (Low molecular mass protein 10) (Macropain subunit MECl-1) (Multicatalytic endopeptidase complex subunit MECl-1) (Proteasome MECl-1) (Proteasome subunit beta-2i)	PSB10_HUMAN	-1.38871					-0.411846	-0.344124		-0.210786
P49721	PSMB2	Proteasome subunit beta type-2 (EC 3.4.25.1) (Macropain subunit C7-I) (Multicatalytic endopeptidase complex subunit C7-I) (Proteasome component C7-I)	PSB2_HUMAN	-0.289507	-0.0220155	-0.0214531	0.00552757	0.0522762	0.0154511	-0.040647	0.163488	-0.0525537
P49720	PSMB3	Proteasome subunit beta type-3 (EC 3.4.25.1) (Proteasome chain 13) (Proteasome component C10-II) (Proteasome theta chain)	PSB3_HUMAN	-0.230358	-0.00211591	-0.062373	-0.122597	0.0904862	0.0236029	0.0212075	0.0986977	-0.0541085
P28070	PSMB4 PROS26	Proteasome subunit beta type-4 (EC 3.4.25.1) (26 kDa prosomal protein) (HsBPROS26) (PROS-26) (Macropain beta chain) (Multicatalytic endopeptidase complex beta chain) (Proteasome beta chain) (Proteasome chain 3) (HsN3)	PSB4_HUMAN	-0.223893	-0.00919142	-0.0923288	0.0573052	0.0128793	0.00445506	0.0329903	0.075035	-0.0859134
P28074	PSMB5 LMPX MB1 X	Proteasome subunit beta type-5 (EC 3.4.25.1) (Macropain epsilon chain) (Multicatalytic endopeptidase complex epsilon chain) (Proteasome chain 6) (Proteasome epsilon chain) (Proteasome subunit MB1) (Proteasome subunit X)	PSB5_HUMAN		0.302201	0.0153564	0.0391541	0.276307	0.137804	0.0875148	0.0580952	0.00829996
P28072	PSMB6 LMPY Y	Proteasome subunit beta type-6 (EC 3.4.25.1) (Macropain delta chain) (Multicatalytic endopeptidase complex delta chain) (Proteasome delta chain) (Proteasome subunit Y)	PSB6_HUMAN	0.395013	0.210158	-0.0148043	0.0940898	0.167974	0.186538	0.0866837	0.0792391	0.00232881
Q99436	PSMB7 Z	Proteasome subunit beta type-7 (EC 3.4.25.1) (Macropain chain Z) (Multicatalytic endopeptidase complex chain Z) (Proteasome subunit Z)	PSB7_HUMAN	0.277534	0.0341276	-0.0419507		0.0904862	0.163558	0.0856857	-0.00118314	-0.0137162
P28062	PSMB8 LMP7 PSMB5i RING10 Y2	Proteasome subunit beta type-8 (EC 3.4.25.1) (Low molecular mass protein 7) (Macropain subunit C13) (Multicatalytic endopeptidase complex subunit C13) (Proteasome component C13) (Proteasome subunit beta-5i) (Really interesting new gene 10 protein)	PSB8_HUMAN		-0.814172		-0.00693938		-0.186003
P28065	PSMB9 LMP2 PSMB6i RING12	Proteasome subunit beta type-9 (EC 3.4.25.1) (Low molecular mass protein 2) (Macropain chain 7) (Multicatalytic endopeptidase complex chain 7) (Proteasome chain 7) (Proteasome subunit beta-1i) (Really interesting new gene 12 protein)	PSB9_HUMAN	-1.05649	-0.77192	-0.222718	0.0838204	-0.357798	-0.114665	-0.260318		-0.0693991
Q9Y2B0	CNPY2 MSAP TMEM4 ZSIG9 UNQ1943/PRO4426	Protein canopy homolog 2 (MIR-interacting saposin-like protein) (Putative secreted protein Zsig9) (Transmembrane protein 4)	CNPY2_HUMAN	-0.582361	-0.204392	-0.299915	0.16441	-0.395052	-0.541019	-0.171736	0.299431	-0.237033
O75629	CREG1 CREG UNQ727/PRO1409	Protein CREG1 (Cellular repressor of E1A-stimulated genes 1)	CREG1_HUMAN			0.0538167			-0.733389	0.285923		0.180357
O60888	CUTA ACHAP C6orf82	Protein CutA (Acetylcholinesterase-associated protein) (Brain acetylcholinesterase putative membrane anchor)	CUTA_HUMAN	0.549654	-0.083416		0.150618	0.575713	0.251142		0.00457554	0.0689141
O00622	CYR61 CCN1 GIG1 IGFBP10	Protein CYR61 (CCN family member 1) (Cysteine-rich angiogenic inducer 61) (Insulin-like growth factor-binding protein 10) (IBP-10) (IGF-binding protein 10) (IGFBP-10) (Protein GIG1)	CYR61_HUMAN	-1.03855	-0.993671	0.186822	-1.3247	0.196803	-0.881703	0.645303	-0.0830623	0.17609
P07237	P4HB ERBA2L PDI PDIA1 PO4DB	Protein disulfide-isomerase (PDI) (EC 5.3.4.1) (Cellular thyroid hormone-binding protein) (Prolyl 4-hydroxylase subunit beta) (p55)	PDIA1_HUMAN	-0.509105	0.0409943	0.207255	0.372416	-0.544711	0.010866	-0.0712989	0.319709	-0.106915
P30101	PDIA3 ERP57 ERP60 GRP58	Protein disulfide-isomerase A3 (EC 5.3.4.1) (58 kDa glucose-regulated protein) (58 kDa microsomal protein) (p58) (Disulfide isomerase ER-60) (Endoplasmic reticulum resident protein 57) (ER protein 57) (ERp57) (Endoplasmic reticulum resident protein 60) (ER protein 60) (ERp60)	PDIA3_HUMAN	-0.32881	0.11184	0.0901118	0.523468	-0.475469	-0.102371	-0.1011	0.431354	-0.143593
P13667	PDIA4 ERP70 ERP72	Protein disulfide-isomerase A4 (EC 5.3.4.1) (Endoplasmic reticulum resident protein 70) (ER protein 70) (ERp70) (Endoplasmic reticulum resident protein 72) (ER protein 72) (ERp-72) (ERp72)	PDIA4_HUMAN	-0.571062	0.00773188	0.274376	-0.661735	-0.527461	0.116773	-0.103375	0.326798	-0.109787
Q15084	PDIA6 ERP5 P5 TXNDC7	Protein disulfide-isomerase A6 (EC 5.3.4.1) (Endoplasmic reticulum protein 5) (ER protein 5) (ERp5) (Protein disulfide isomerase P5) (Thioredoxin domain-containing protein 7)	PDIA6_HUMAN	-0.0596107	-0.060157	0.176338	-0.0240442	-0.764034	0.251142	-0.272636	-0.0294209	0.209444
Q99497	PARK7	Protein DJ-1 (DJ-1) (Oncogene DJ1) (Parkinson disease protein 7) (Parkinsonism-associated deglycase) (Protein deglycase DJ-1) (EC 3.1.2.-) (EC 3.5.1.124)	PARK7_HUMAN	0.596334	0.156788	0.149072	0.211672	0.485129	0.2231	0.0438215	0.113805	-0.0297716
Q92520	FAM3C ILEI GS3786	Protein FAM3C (Interleukin-like EMT inducer)	FAM3C_HUMAN	-0.941087	-0.0390038	0.346909	-2.02076	-0.229697	0.140955	0.547218	-0.0872965	0.0474883
Q9NUQ9	FAM49B BM-009	Protein FAM49B (L1)	FA49B_HUMAN	0.143931	0.424871		-0.0814852	-0.330055				0.434303
P31949	S100A11 MLN70 S100C	Protein S100-A11 (Calgizzarin) (Metastatic lymph node gene 70 protein) (MLN 70) (Protein S100-C) (S100 calcium-binding protein A11) [Cleaved into: Protein S100-A11, N-terminally processed]	S10AB_HUMAN	-0.307559	-0.439918	-0.580975	-0.423988	-0.122371	-0.411626	0.121671	-0.0193473	-0.00500299
Q99584	S100A13	Protein S100-A13 (S100 calcium-binding protein A13)	S10AD_HUMAN					0.12771
Q96FQ6	S100A16 S100F AAG13	Protein S100-A16 (Aging-associated gene 13 protein) (Protein S100-F) (S100 calcium-binding protein A16)	S10AG_HUMAN	-0.282579	-0.107056	-0.258994	-0.212784	0.0708		0.148839	0.073631
P29034	S100A2 S100L	Protein S100-A2 (CAN19) (Protein S-100L) (S100 calcium-binding protein A2)	S10A2_HUMAN	1.401	-0.538225	0.483905	-3.79035	-0.248653	-1.62977	0.162471
P06703	S100A6 CACY	Protein S100-A6 (Calcyclin) (Growth factor-inducible protein 2A9) (MLN 4) (Prolactin receptor-associated protein) (PRA) (S100 calcium-binding protein A6)	S10A6_HUMAN	-0.682656	-0.313671	-0.926656	0.0139318	-0.152962	-0.363208	-0.0882797	-0.0789966	-0.0965541
Q01105	SET	Protein SET (HLA-DR-associated protein II) (Inhibitor of granzyme A-activated DNase) (IGAAD) (PHAPII) (Phosphatase 2A inhibitor I2PP2A) (I-2PP2A) (Template-activating factor I) (TAF-I)	SET_HUMAN	0.0822079	-0.112075	-0.608579	0.139488	0.0340926	-0.16029	0.0419362	-0.0571454	-0.0926433
Q92734	TFG	Protein TFG (TRK-fused gene protein)	TFG_HUMAN						-0.498608
P22061	PCMT1	Protein-L-isoaspartate(D-aspartate) O-methyltransferase (PIMT) (EC 2.1.1.77) (L-isoaspartyl protein carboxyl methyltransferase) (Protein L-isoaspartyl/D-aspartyl methyltransferase) (Protein-beta-aspartate methyltransferase)	PIMT_HUMAN	0.750632
Q9NYQ8	FAT2 CDHF8 KIAA0811 MEGF1	Protocadherin Fat 2 (hFat2) (Cadherin family member 8) (Multiple epidermal growth factor-like domains protein 1) (Multiple EGF-like domains protein 1)	FAT2_HUMAN	-0.988524	-1.37505	-0.539117		-1.4207	-0.278386	-0.0587392	-0.452022	0.34144
Q08623	PUDP DXF68S1E FAM16AX GS1 HDHD1 HDHD1A	Pseudouridine-5'-phosphatase (EC 3.1.3.96) (Haloacid dehalogenase-like hydrolase domain-containing protein 1) (Haloacid dehalogenase-like hydrolase domain-containing protein 1A) (Protein GS1) (Pseudouridine-5'-monophosphatase) (5'-PsiMPase)	HDHD1_HUMAN					0.271387		-0.00548386
P00491	PNP NP	Purine nucleoside phosphorylase (PNP) (EC 2.4.2.1) (Inosine phosphorylase) (Inosine-guanosine phosphorylase)	PNPH_HUMAN	0.537744		0.449232		0.0420581	-0.0463475	0.0686142		-0.0666069
P55786	NPEPPS PSA	Puromycin-sensitive aminopeptidase (PSA) (EC 3.4.11.14) (Cytosol alanyl aminopeptidase) (AAP-S)	PSA_HUMAN	-0.515408				-0.113818	-0.535499			-0.0699233
Q2VIR3	EIF2S3L	Putative eukaryotic translation initiation factor 2 subunit 3-like protein (Eukaryotic translation initiation factor 2 subunit gamma A) (eIF-2-gamma A) (eIF-2gA)	IF2GL_HUMAN	0.551809	-0.0942093		-0.145046
O00764	PDXK C21orf124 C21orf97 PKH PNK PRED79	Pyridoxal kinase (EC 2.7.1.35) (Pyridoxine kinase)	PDXK_HUMAN	0.785844	0.235522	0.14699	0.44088	0.77396	0.660615	0.0868499
P14618	PKM OIP3 PK2 PK3 PKM2	Pyruvate kinase PKM (EC 2.7.1.40) (Cytosolic thyroid hormone-binding protein) (CTHBP) (Opa-interacting protein 3) (OIP-3) (Pyruvate kinase 2/3) (Pyruvate kinase muscle isozyme) (Thyroid hormone-binding protein 1) (THBP1) (Tumor M2-PK) (p58)	KPYM_HUMAN	1.38357	0.310181	0.0886106	-0.343706	0.656234	1.33869	-0.0613161	-0.07806	0.375204
Q08257	CRYZ	Quinone oxidoreductase (EC 1.6.5.5) (NADPH:quinone reductase) (Zeta-crystallin)	QOR_HUMAN			-0.0718541				-0.0501217
P31150	GDI1 GDIL OPHN2 RABGDIA XAP4	Rab GDP dissociation inhibitor alpha (Rab GDI alpha) (Guanosine diphosphate dissociation inhibitor 1) (GDI-1) (Oligophrenin-2) (Protein XAP-4)	GDIA_HUMAN	0.451504	0.261624	-0.0533221	0.00813047	0.39979	0.278649	0.0736562	0.0609323	0.0850126
P50395	GDI2 RABGDIB	Rab GDP dissociation inhibitor beta (Rab GDI beta) (Guanosine diphosphate dissociation inhibitor 2) (GDI-2)	GDIB_HUMAN	0.460708	0.131275	-0.102771	-0.0120496	0.238994	0.216004	0.0871824	0.0466904	0.0531153
P35241	RDX	Radixin	RADI_HUMAN	0.363464	0.0586963	-0.108691	0.248397	0.250289	0.0725125	-0.0589231	0.120619	0.00232881
P43487	RANBP1	Ran-specific GTPase-activating protein (Ran-binding protein 1) (RanBP1)	RANG_HUMAN	0.984769	0.323759				0.910522			-0.0140523
Q13283	G3BP1 G3BP	Ras GTPase-activating protein-binding protein 1 (G3BP-1) (EC 3.6.4.12) (EC 3.6.4.13) (ATP-dependent DNA helicase VIII) (hDH VIII) (GAP SH3 domain-binding protein 1)	G3BP1_HUMAN			0.202174
P46940	IQGAP1 KIAA0051	Ras GTPase-activating-like protein IQGAP1 (p195)	IQGA1_HUMAN	-0.171405	-0.0446628	-0.0966866	-0.404716	-0.219273	0.0232777	-0.370588	0.00354362	0.155163
P62491	RAB11A RAB11	Ras-related protein Rab-11A (Rab-11) (YL8)	RB11A_HUMAN			-0.168262	0.332657
Q15907	RAB11B YPT3	Ras-related protein Rab-11B (GTP-binding protein YPT3)	RB11B_HUMAN	-0.179783	-0.060157			0.246534	0.260829	-0.0410103	-0.0698129	-0.229206
P51149	RAB7A RAB7	Ras-related protein Rab-7a	RAB7A_HUMAN		0.508499					-0.178714
P11233	RALA RAL	Ras-related protein Ral-A	RALA_HUMAN			-0.441904				-0.591421
P10586	PTPRF LAR	Receptor-type tyrosine-protein phosphatase F (EC 3.1.3.48) (Leukocyte common antigen related) (LAR)	PTPRF_HUMAN	-0.135422	-0.0205849	-0.0103292		-0.162084	-0.289452	0.0987704		-0.0837946
Q15262	PTPRK PTPK	Receptor-type tyrosine-protein phosphatase kappa (Protein-tyrosine phosphatase kappa) (R-PTP-kappa) (EC 3.1.3.48)	PTPRK_HUMAN	-0.27492	-0.351657			-0.13179	-0.336044		-0.0294209	0.0835993
Q15293	RCN1 RCN	Reticulocalbin-1	RCN1_HUMAN	0.193079	-0.245744	0.153706	0.040501	-0.566127	-0.286425	-0.144743	0.139531	-0.215611
Q14257	RCN2 ERC55	Reticulocalbin-2 (Calcium-binding protein ERC-55) (E6-binding protein) (E6BP)	RCN2_HUMAN					-0.815706
Q9HB40	SCPEP1 RISC SCP1 MSTP034 UNQ265/PRO302	Retinoid-inducible serine carboxypeptidase (EC 3.4.16.-) (Serine carboxypeptidase 1)	RISC_HUMAN	-1.37228		-0.203996		-1.78463	-0.590178	0.203682		0.697132
P52565	ARHGDIA GDIA1	Rho GDP-dissociation inhibitor 1 (Rho GDI 1) (Rho-GDI alpha)	GDIR1_HUMAN	0.683428	0.174382	-0.353775	0.375977	0.402042	0.213156	0.175662	-0.00607389	-0.301431
P13489	RNH1 PRI RNH	Ribonuclease inhibitor (Placental ribonuclease inhibitor) (Placental RNase inhibitor) (Ribonuclease/angiogenin inhibitor 1) (RAI)	RINI_HUMAN		0.0355036			0.0417692	0.635304			0.289264
O00584	RNASET2 RNASE6PL	Ribonuclease T2 (EC 3.1.27.-) (Ribonuclease 6)	RNT2_HUMAN	-0.695378						0.470289	-0.311837	0.210883
Q9P2E9	RRBP1 KIAA1398	Ribosome-binding protein 1 (180 kDa ribosome receptor homolog) (RRp) (ES/130-related protein) (Ribosome receptor protein)	RRBP1_HUMAN					-0.207206
Q9Y5S9	RBM8A RBM8 HSPC114 MDS014	RNA-binding protein 8A (Binder of OVCA1-1) (BOV-1) (RNA-binding motif protein 8A) (RNA-binding protein Y14) (Ribonucleoprotein RBM8A)	RBM8A_HUMAN		0.127409	-0.196859	0.0903377	0.0693835	-0.0647239	-0.198635		-0.220645
Q5TZA2	CROCC KIAA0445	Rootletin (Ciliary rootlet coiled-coil protein)	CROCC_HUMAN						0.035906			-0.00885041
Q9Y265	RUVBL1 INO80H NMP238 TIP49 TIP49A	RuvB-like 1 (EC 3.6.4.12) (49 kDa TATA box-binding protein-interacting protein) (49 kDa TBP-interacting protein) (54 kDa erythrocyte cytosolic protein) (ECP-54) (INO80 complex subunit H) (Nuclear matrix protein 238) (NMP 238) (Pontin 52) (TIP49a) (TIP60-associated protein 54-alpha) (TAP54-alpha)	RUVB1_HUMAN			-0.309779		-0.880205		-0.282481
P31153	MAT2A AMS2 MATA2	S-adenosylmethionine synthase isoform type-2 (AdoMet synthase 2) (EC 2.5.1.6) (Methionine adenosyltransferase 2) (MAT 2) (Methionine adenosyltransferase II) (MAT-II)	METK2_HUMAN	-0.308731	-0.0770083	0.307303	0.133891	-0.0352225	-0.520487	0.188114	0.193532	-0.330862
Q12765	SCRN1 KIAA0193	Secernin-1	SCRN1_HUMAN					-1.14933	-0.198275	-0.474451		0.0886179
Q15019	SEPT2 DIFF6 KIAA0158 NEDD5	Septin-2 (Neural precursor cell expressed developmentally down-regulated protein 5) (NEDD-5)	SEPT2_HUMAN		-0.0148769	0.258443	0.182146	0.100229		-0.0220616	0.0986977
Q16181	SEPT7 CDC10	Septin-7 (CDC10 protein homolog)	SEPT7_HUMAN			-0.0662694		-0.0984527
P34897	SHMT2	Serine hydroxymethyltransferase, mitochondrial (SHMT) (EC 2.1.2.1) (Glycine hydroxymethyltransferase) (Serine methylase)	GLYM_HUMAN				-0.800334	1.92335	2.02985
P30153	PPP2R1A	Serine/threonine-protein phosphatase 2A 65 kDa regulatory subunit A alpha isoform (Medium tumor antigen-associated 61 kDa protein) (PP2A subunit A isoform PR65-alpha) (PP2A subunit A isoform R1-alpha)	2AAA_HUMAN					-0.592342	0.164148
Q15257	PPP2R4 PTPA	Serine/threonine-protein phosphatase 2A activator (EC 5.2.1.8) (PP2A, subunit B', PR53 isoform) (Phosphotyrosyl phosphatase activator) (PTPA) (Serine/threonine-protein phosphatase 2A regulatory subunit 4) (Serine/threonine-protein phosphatase 2A regulatory subunit B')	PTPA_HUMAN	0.160971	-0.176725	-0.1235	0.195642	0.0508414	-0.00612751	0.0939809	-0.0520787	-0.049277
P53041	PPP5C PPP5	Serine/threonine-protein phosphatase 5 (PP5) (EC 3.1.3.16) (Protein phosphatase T) (PP-T) (PPT)	PPP5_HUMAN						0.696748
P62136	PPP1CA PPP1A	Serine/threonine-protein phosphatase PP1-alpha catalytic subunit (PP-1A) (EC 3.1.3.16)	PP1A_HUMAN		0.0286106				0.17253	-0.0941103
P36952	SERPINB5 PI5	Serpin B5 (Maspin) (Peptidase inhibitor 5) (PI-5)	SPB5_HUMAN	0.629358	0.478463	-0.163882	0.270247	0.330527	0.480461	0.269172	0.194824	0.153667
P35237	SERPINB6 PI6 PTI	Serpin B6 (Cytoplasmic antiproteinase) (CAP) (Peptidase inhibitor 6) (PI-6) (Placental thrombin inhibitor)	SPB6_HUMAN	-0.459432	0.260448	-0.2329	0.344821	0.478741	0.0468259	-0.101479	0.0423903	-0.0534173
P50454	SERPINH1 CBP1 CBP2 HSP47 SERPINH2 PIG14	Serpin H1 (47 kDa heat shock protein) (Arsenic-transactivated protein 3) (AsTP3) (Cell proliferation-inducing gene 14 protein) (Collagen-binding protein) (Colligin) (Rheumatoid arthritis-related antigen RA-A47)	SERPH_HUMAN			-0.378938				-0.348839	0.768115
P0DJI8	SAA1	Serum amyloid A-1 protein (SAA) [Cleaved into: Amyloid protein A (Amyloid fibril protein AA); Serum amyloid protein A(2-104); Serum amyloid protein A(3-104); Serum amyloid protein A(2-103); Serum amyloid protein A(2-102); Serum amyloid protein A(4-101)]	SAA1_HUMAN	-4.62053		0.388171		-0.0416365	-0.771812
P0DJI9	SAA2	Serum amyloid A-2 protein (SAA2)	SAA2_HUMAN	-4.64165		0.254878		-0.0567144	-0.849187	0.145491		-0.3475
P10768	ESD	S-formylglutathione hydrolase (FGH) (EC 3.1.2.12) (Esterase D) (Methylumbelliferyl-acetate deacetylase) (EC 3.1.1.56)	ESTD_HUMAN	1.401
Q9H299	SH3BGRL3 P1725	SH3 domain-binding glutamic acid-rich-like protein 3 (SH3 domain-binding protein 1) (SH3BP-1)	SH3L3_HUMAN	-0.125746	0.0286106	-0.665703	0.224896	0.199395	0.102683	0.271221		0.11668
Q04837	SSBP1 SSBP	Single-stranded DNA-binding protein, mitochondrial (Mt-SSB) (MtSSB) (PWP1-interacting protein 17)	SSBP_HUMAN		-0.0291895	0.228009		0.715392	0.393812	0.0410784	0.410373	-0.203483
P62304	SNRPE	Small nuclear ribonucleoprotein E (snRNP-E) (Sm protein E) (Sm-E) (SmE)	RUXE_HUMAN		-0.0263156	0.100576	0.0871551	0.137206		-0.255884	-0.00785646
P62306	SNRPF PBSCF	Small nuclear ribonucleoprotein F (snRNP-F) (Sm protein F) (Sm-F) (SmF)	RUXF_HUMAN					-0.166583
P62314	SNRPD1	Small nuclear ribonucleoprotein Sm D1 (Sm-D1) (Sm-D autoantigen) (snRNP core protein D1)	SMD1_HUMAN			0.288974		0.214853		-0.338755
P62316	SNRPD2 SNRPD1	Small nuclear ribonucleoprotein Sm D2 (Sm-D2) (snRNP core protein D2)	SMD2_HUMAN		-0.0909028	0.190403	0.167153	0.211004		-0.480597
P62318	SNRPD3	Small nuclear ribonucleoprotein Sm D3 (Sm-D3) (snRNP core protein D3)	SMD3_HUMAN					0.260256		-0.286567
P63165	SUMO1 SMT3C SMT3H3 UBL1 OK/SW-cl.43	Small ubiquitin-related modifier 1 (SUMO-1) (GAP-modifying protein 1) (GMP1) (SMT3 homolog 3) (Sentrin) (Ubiquitin-homology domain protein PIC1) (Ubiquitin-like protein SMT3C) (Smt3C) (Ubiquitin-like protein UBL1)	SUMO1_HUMAN	-0.8934
P61956	SUMO2 SMT3B SMT3H2	Small ubiquitin-related modifier 2 (SUMO-2) (HSMT3) (SMT3 homolog 2) (SUMO-3) (Sentrin-2) (Ubiquitin-like protein SMT3B) (Smt3B)	SUMO2_HUMAN	-0.451209	-0.114514	-0.13983	-0.0160886	-0.152466	-0.291877	-0.0315951	0.254286	-0.235857
Q8WVQ1	CANT1 SHAPY	Soluble calcium-activated nucleotidase 1 (SCAN-1) (EC 3.6.1.6) (Apyrase homolog) (Putative MAPK-activating protein PM09) (Putative NF-kappa-B-activating protein 107)	CANT1_HUMAN		0.0161197
P09486	SPARC ON	SPARC (Basement-membrane protein 40) (BM-40) (Osteonectin) (ON) (Secreted protein acidic and rich in cysteine)	SPRC_HUMAN	-0.939876	-1.18808	-0.312862	1.10056	-0.785916	-0.58968	0.655427	0.0215693	0.225196
Q13813	SPTAN1 NEAS SPTA2	Spectrin alpha chain, non-erythrocytic 1 (Alpha-II spectrin) (Fodrin alpha chain) (Spectrin, non-erythroid alpha subunit)	SPTN1_HUMAN	-0.415406		-0.226035		-0.326135	-0.400895	-0.361486		-0.0629503
Q01082	SPTBN1 SPTB2	Spectrin beta chain, non-erythrocytic 1 (Beta-II spectrin) (Fodrin beta chain) (Spectrin, non-erythroid beta chain 1)	SPTB2_HUMAN			-0.533199		-0.820688		-0.435486
P63208	SKP1 EMC19 OCP2 SKP1A TCEB1L	S-phase kinase-associated protein 1 (Cyclin-A/CDK2-associated protein p19) (p19A) (Organ of Corti protein 2) (OCP-2) (Organ of Corti protein II) (OCP-II) (RNA polymerase II elongation factor-like protein) (SIII) (Transcription elongation factor B polypeptide 1-like) (p19skp1)	SKP1_HUMAN	-0.258402	0.0119319	-0.296206	-0.00585773	-0.0593461	-0.297959		-0.227032	-0.384618
Q13838	DDX39B BAT1 UAP56	Spliceosome RNA helicase DDX39B (EC 3.6.4.13) (56 kDa U2AF65-associated protein) (ATP-dependent RNA helicase p47) (DEAD box protein UAP56) (HLA-B-associated transcript 1 protein)	DX39B_HUMAN		0.17063	0.00336768	-0.0899745	-0.460864	0.48755	-0.270292	0.130106
Q15393	SF3B3 KIAA0017 SAP130	Splicing factor 3B subunit 3 (Pre-mRNA-splicing factor SF3b 130 kDa subunit) (SF3b130) (STAF130) (Spliceosome-associated protein 130) (SAP 130)	SF3B3_HUMAN		-0.157417	-0.317499	0.0868655	-0.25858		-0.412274	-0.14432
P23246	SFPQ PSF	Splicing factor, proline- and glutamine-rich (100 kDa DNA-pairing protein) (hPOMp100) (DNA-binding p52/p100 complex, 100 kDa subunit) (Polypyrimidine tract-binding protein-associated-splicing factor) (PSF) (PTB-associated-splicing factor)	SFPQ_HUMAN					-0.450057
O76061	STC2	Stanniocalcin-2 (STC-2) (Stanniocalcin-related protein) (STC-related protein) (STCRP)	STC2_HUMAN	0.336219	0.282635		1.17194	1.97382	1.45115	0.594758
Q7KZF4	SND1 TDRD11	Staphylococcal nuclease domain-containing protein 1 (100 kDa coactivator) (EBNA2 coactivator p100) (Tudor domain-containing protein 11) (p100 co-activator)	SND1_HUMAN		0.00211281	-0.465723
P16949	STMN1 C1orf215 LAP18 OP18	Stathmin (Leukemia-associated phosphoprotein p18) (Metablastin) (Oncoprotein 18) (Op18) (Phosphoprotein p19) (pp19) (Prosolin) (Protein Pr22) (pp17)	STMN1_HUMAN	-0.120933	0.178124	0.0969307	-0.247793	0.516653	0.106219	-0.189949	0.0305707	-0.208668
P38646	HSPA9 GRP75 HSPA9B mt-HSP70	Stress-70 protein, mitochondrial (75 kDa glucose-regulated protein) (GRP-75) (Heat shock 70 kDa protein 9) (Mortalin) (MOT) (Peptide-binding protein 74) (PBP74)	GRP75_HUMAN	1.4744	0.637329	0.74863	-0.336501	1.32816	1.24139	0.251334	-0.123557	-0.115006
P31948	STIP1	Stress-induced-phosphoprotein 1 (STI1) (Hsc70/Hsp90-organizing protein) (Hop) (Renal carcinoma antigen NY-REN-11) (Transformation-sensitive protein IEF SSP 3521)	STIP1_HUMAN	1.01163	0.505524			0.505174	0.815125	-0.356956
Q9UQE7	SMC3 BAM BMH CSPG6 SMC3L1	Structural maintenance of chromosomes protein 3 (SMC protein 3) (SMC-3) (Basement membrane-associated chondroitin proteoglycan) (Bamacan) (Chondroitin sulfate proteoglycan 6) (Chromosome-associated polypeptide) (hCAP)	SMC3_HUMAN		-0.0963174
P55809	OXCT1 OXCT SCOT	Succinyl-CoA:3-ketoacid coenzyme A transferase 1, mitochondrial (EC 2.8.3.5) (3-oxoacid CoA-transferase 1) (Somatic-type succinyl-CoA:3-oxoacid CoA-transferase) (SCOT-s)	SCOT1_HUMAN			-0.153581		0.0904862
Q8NBJ7	SUMF2 PSEC0171 UNQ1968/PRO4500	Sulfatase-modifying factor 2 (C-alpha-formylglycine-generating enzyme 2)	SUMF2_HUMAN	0.885745					-0.0636872	-0.493465		0.0437785
O00391	QSOX1 QSCN6 UNQ2520/PRO6013	Sulfhydryl oxidase 1 (hQSOX) (EC 1.8.3.2) (Quiescin Q6)	QSOX1_HUMAN	-0.24207	-0.480446	0.536236	-0.76749	0.015971	0.178237	0.552043	-0.187943	0.150221
Q9UBE0	SAE1 AOS1 SUA1 UBLE1A	SUMO-activating enzyme subunit 1 (Ubiquitin-like 1-activating enzyme E1A) [Cleaved into: SUMO-activating enzyme subunit 1, N-terminally processed]	SAE1_HUMAN	-0.121276					0.364588			0.136807
Q9UBT2	UBA2 SAE2 UBLE1B HRIHFB2115	SUMO-activating enzyme subunit 2 (EC 6.3.2.-) (Anthracycline-associated resistance ARX) (Ubiquitin-like 1-activating enzyme E1B) (Ubiquitin-like modifier-activating enzyme 2)	SAE2_HUMAN	-0.0741584		-0.462785		-0.4821				0.204685
P63279	UBE2I UBC9 UBCE9	SUMO-conjugating enzyme UBC9 (EC 2.3.2.-) (RING-type E3 SUMO transferase UBC9) (SUMO-protein ligase) (Ubiquitin carrier protein 9) (Ubiquitin carrier protein I) (Ubiquitin-conjugating enzyme E2 I) (Ubiquitin-protein ligase I) (p18)	UBC9_HUMAN	-0.613896	-0.349321	-0.10239			-0.167696		0.0283981	-0.311933
P00441	SOD1	Superoxide dismutase [Cu-Zn] (EC 1.15.1.1) (Superoxide dismutase 1) (hSod1)	SODC_HUMAN	0.506978	-0.00352824	0.0478208	0.0527146	0.171939	-0.274383	0.0130068	0.0538289	-0.0523811
P04179	SOD2	Superoxide dismutase [Mn], mitochondrial (EC 1.15.1.1)	SODM_HUMAN	-1.39451	-0.158675	0.873016	0.209013	0.942822	-0.542944	-0.0751998	0.170073	-0.531125
Q8TAQ2	SMARCC2 BAF170	SWI/SNF complex subunit SMARCC2 (BRG1-associated factor 170) (BAF170) (SWI/SNF complex 170 kDa subunit) (SWI/SNF-related matrix-associated actin-dependent regulator of chromatin subfamily C member 2)	SMRC2_HUMAN			0.27555
P31431	SDC4	Syndecan-4 (SYND4) (Amphiglycan) (Ryudocan core protein)	SDC4_HUMAN	-0.37105	-0.753505	-0.0117597	-1.18944	-0.118169	-0.460589	0.591246	-0.0695026	-0.0894515
P17987	TCP1 CCT1 CCTA	T-complex protein 1 subunit alpha (TCP-1-alpha) (CCT-alpha)	TCPA_HUMAN	0.968729		-0.140808	0.0775652	0.14664		-0.167169
P78371	CCT2 99D8.1 CCTB	T-complex protein 1 subunit beta (TCP-1-beta) (CCT-beta)	TCPB_HUMAN			-0.129117	-0.271923	0.0142051		-0.207579
P50991	CCT4 CCTD SRB	T-complex protein 1 subunit delta (TCP-1-delta) (CCT-delta) (Stimulator of TAR RNA-binding)	TCPD_HUMAN			-0.048359		0.158679	1.78523
P48643	CCT5 CCTE KIAA0098	T-complex protein 1 subunit epsilon (TCP-1-epsilon) (CCT-epsilon)	TCPE_HUMAN	1.22719		-0.172856		0.161341	1.44083	0.0572896	0.188352
Q99832	CCT7 CCTH NIP7-1	T-complex protein 1 subunit eta (TCP-1-eta) (CCT-eta) (HIV-1 Nef-interacting protein) [Cleaved into: T-complex protein 1 subunit eta, N-terminally processed]	TCPH_HUMAN		-0.0712212	0.0562081		0.160011	1.47809	-0.15218		0.67123
P49368	CCT3 CCTG TRIC5	T-complex protein 1 subunit gamma (TCP-1-gamma) (CCT-gamma) (hTRiC5)	TCPG_HUMAN	1.32114		0.202945		0.216133		-0.189949	-0.0687272
P50990	CCT8 C21orf112 CCTQ KIAA0002	T-complex protein 1 subunit theta (TCP-1-theta) (CCT-theta) (Renal carcinoma antigen NY-REN-15)	TCPQ_HUMAN	1.11508		0.0329813		0.131788	1.25114	-0.259472
P40227	CCT6A CCT6 CCTZ	T-complex protein 1 subunit zeta (TCP-1-zeta) (Acute morphine dependence-related protein 2) (CCT-zeta-1) (HTR3) (Tcp20)	TCPZ_HUMAN	1.13174	0.0735071	-0.0176757		0.173259	1.37673	-0.122661
P24821	TNC HXB	Tenascin (TN) (Cytotactin) (GMEM) (GP 150-225) (Glioma-associated-extracellular matrix antigen) (Hexabrachion) (JI) (Myotendinous antigen) (Neuronectin) (Tenascin-C) (TN-C)	TENA_HUMAN	1.45554		1.2776		0.673119	1.63158
P52888	THOP1	Thimet oligopeptidase (EC 3.4.24.15) (Endopeptidase 24.15) (MP78)	THOP1_HUMAN						-0.374946
P10599	TXN TRDX TRX TRX1	Thioredoxin (Trx) (ATL-derived factor) (ADF) (Surface-associated sulphydryl protein) (SASP)	THIO_HUMAN	0.89001	0.200377	-0.032845	-0.0523193	0.461566	0.123312	0.151067	-0.0172513	0.0682791
O95881	TXNDC12 TLP19 UNQ713/PRO1376	Thioredoxin domain-containing protein 12 (EC 1.8.4.2) (Endoplasmic reticulum resident protein 18) (ER protein 18) (ERp18) (Endoplasmic reticulum resident protein 19) (ER protein 19) (ERp19) (Thioredoxin-like protein p19) (hTLP19)	TXD12_HUMAN					-0.435706	-0.313278			-0.163219
Q9BRA2	TXNDC17 TXNL5	Thioredoxin domain-containing protein 17 (14 kDa thioredoxin-related protein) (TRP14) (Protein 42-9-9) (Thioredoxin-like protein 5)	TXD17_HUMAN	0.26314	0.21745	-0.074094	-0.200181	0.456156	-0.0521614	0.127986	-0.00741061	0.0355183
Q8NBS9	TXNDC5 TLP46 UNQ364/PRO700	Thioredoxin domain-containing protein 5 (Endoplasmic reticulum resident protein 46) (ER protein 46) (ERp46) (Thioredoxin-like protein p46)	TXND5_HUMAN	-0.0101364	0.0614005	0.392233	0.270247	-0.303936	0.0179015	-0.100343	0.224229	-0.125137
Q16881	TXNRD1 GRIM12 KDRF	Thioredoxin reductase 1, cytoplasmic (TR) (EC 1.8.1.9) (Gene associated with retinoic and interferon-induced mortality 12 protein) (GRIM-12) (Gene associated with retinoic and IFN-induced mortality 12 protein) (KM-102-derived reductase-like factor) (Thioredoxin reductase TR1)	TRXR1_HUMAN		0.34389	-0.0162393	0.4589	0.704483	0.38498
P30048	PRDX3 AOP1	Thioredoxin-dependent peroxide reductase, mitochondrial (EC 1.11.1.15) (Antioxidant protein 1) (AOP-1) (HBC189) (Peroxiredoxin III) (Prx-III) (Peroxiredoxin-3) (Protein MER5 homolog)	PRDX3_HUMAN	-0.330595	0.267491	0.264365	-0.214211	0.33407	-0.250791	-0.100911	-0.12404	-0.304923
Q86V81	ALYREF ALY BEF THOC4	THO complex subunit 4 (Tho4) (Ally of AML-1 and LEF-1) (Aly/REF export factor) (Transcriptional coactivator Aly/REF) (bZIP-enhancing factor BEF)	THOC4_HUMAN		0.191764	0.176181	0.0868655			0.0250301	0.294618
P26639	TARS	Threonine--tRNA ligase, cytoplasmic (EC 6.1.1.3) (Threonyl-tRNA synthetase) (ThrRS)	SYTC_HUMAN	0.520244	0.0133292	-0.261757	0.165783	0.204566	0.0764361	-0.301286	0.073631	-0.00133244
P07996	THBS1 TSP TSP1	Thrombospondin-1	TSP1_HUMAN	0.153896	-2.06797	-1.54506	-2.52795	-1.14373	-2.01896	0.56523	0.14489	0.470798
P35442	THBS2 TSP2	Thrombospondin-2	TSP2_HUMAN		-1.78838	0.531333	-2.38128	-0.261073	-0.919026	0.627127	0.121979
P04066	FUCA1 Nbla10230	Tissue alpha-L-fucosidase (EC 3.2.1.51) (Alpha-L-fucosidase I) (Alpha-L-fucoside fucohydrolase 1) (Alpha-L-fucosidase 1)	FUCO_HUMAN	-1.18014	0.456032	0.342717	0.124043	-0.641832	-0.216977	0.258879	0.0346176	0.0579211
P00750	PLAT	Tissue-type plasminogen activator (t-PA) (t-plasminogen activator) (tPA) (EC 3.4.21.68) (Alteplase) (Reteplase) [Cleaved into: Tissue-type plasminogen activator chain A; Tissue-type plasminogen activator chain B]	TPA_HUMAN		-0.45665		1.45498				-0.092331
P37837	TALDO1 TAL TALDO TALDOR	Transaldolase (EC 2.2.1.2)	TALDO_HUMAN	-1.43576	0.201603	-0.0359345	-1.07127	-0.231791	-0.179625	0.0267643	0.082035	-0.216191
P02786	TFRC	Transferrin receptor protein 1 (TR) (TfR) (TfR1) (Trfr) (T9) (p90) (CD antigen CD71) [Cleaved into: Transferrin receptor protein 1, serum form (sTfR)]	TFR1_HUMAN			2.16182
Q15582	TGFBI BIGH3	Transforming growth factor-beta-induced protein ig-h3 (Beta ig-h3) (Kerato-epithelin) (RGD-containing collagen-associated protein) (RGD-CAP)	BGH3_HUMAN	-0.29221	-1.00862	1.25101	-0.200711	0.737858	0.593202	0.583019	-0.0882392	0.218057
P61586	RHOA ARH12 ARHA RHO12	Transforming protein RhoA (Rho cDNA clone 12) (h12)	RHOA_HUMAN				0.308016
P37802	TAGLN2 KIAA0120 CDABP0035	Transgelin-2 (Epididymis tissue protein Li 7e) (SM22-alpha homolog)	TAGL2_HUMAN	0.197215	-0.367755	-0.215282	0.333878	0.329344	-0.143216	0.161839	-0.0205465	-0.154113
P55072	VCP	Transitional endoplasmic reticulum ATPase (TER ATPase) (EC 3.6.4.6) (15S Mg(2+)-ATPase p97 subunit) (Valosin-containing protein) (VCP)	TERA_HUMAN	0.85989	0.227117	0.152748	0.274068	-0.306325	0.502792	-0.375848	-0.0357717	0.209444
P29401	TKT	Transketolase (TK) (EC 2.2.1.1)	TKT_HUMAN	-0.129194	-0.16151	0.114248	0.577044	0.0932767	-0.496975	-0.134241	0.180546	-0.173133
P13693	TPT1	Translationally-controlled tumor protein (TCTP) (Fortilin) (Histamine-releasing factor) (HRF) (p23)	TCTP_HUMAN	1.18685	0.296474	0.344116	0.431785	0.73964	0.87492	0.211022	0.00781391	-0.0681769
Q15631	TSN	Translin (EC 3.1.-.-) (Component 3 of promoter of RISC) (C3PO)	TSN_HUMAN		-0.150203		0.335098			0.123293	-0.111049
Q99598	TSNAX TRAX	Translin-associated protein X (Translin-associated factor X)	TSNAX_HUMAN			0.24488		0.0108145	-0.455141	0.0687826		-0.253609
Q24JP5	TMEM132A HSPA5BP1 KIAA1583	Transmembrane protein 132A (HSPA5-binding protein 1)	T132A_HUMAN			0.264217
P60174	TPI1 TPI	Triosephosphate isomerase (TIM) (EC 5.3.1.1) (Triose-phosphate isomerase)	TPIS_HUMAN	0.0844424	0.192997	0.11228	0.0836753	-0.0772757	0.141105	0.0571199	0.0380773	-0.0732472
O14773	TPP1 CLN2 GIG1 UNQ267/PRO304	Tripeptidyl-peptidase 1 (TPP-1) (EC 3.4.14.9) (Cell growth-inhibiting gene 1 protein) (Lysosomal pepstatin-insensitive protease) (LPIC) (Tripeptidyl aminopeptidase) (Tripeptidyl-peptidase I) (TPP-I)	TPP1_HUMAN	-1.29356	-0.124468	-0.241266	-1.39984	-0.582511	-0.555762	0.304342	-0.101818	0.124795
Q08J23	NSUN2 SAKI TRM4	tRNA (cytosine(34)-C(5))-methyltransferase (EC 2.1.1.203) (Myc-induced SUN domain-containing protein) (Misu) (NOL1/NOP2/Sun domain family member 2) (Substrate of AIM1/Aurora kinase B) (tRNA (cytosine-5-)-methyltransferase) (tRNA methyltransferase 4 homolog) (hTrm4)	NSUN2_HUMAN	-0.804714					-0.345462
P23381	WARS IFI53 WRS	Tryptophan--tRNA ligase, cytoplasmic (EC 6.1.1.2) (Interferon-induced protein 53) (IFP53) (Tryptophanyl-tRNA synthetase) (TrpRS) (hWRS) [Cleaved into: T1-TrpRS; T2-TrpRS]	SYWC_HUMAN	-0.704866		-0.973276		-0.984323	-0.321309	-0.493714		0.218057
Q9NY65	TUBA8 TUBAL2	Tubulin alpha-8 chain (Alpha-tubulin 8) (Tubulin alpha chain-like 2)	TBA8_HUMAN		0.555293
P04350	TUBB4A TUBB4 TUBB5	Tubulin beta-4A chain (Tubulin 5 beta) (Tubulin beta-4 chain)	TBB4A_HUMAN		0.555293			-0.169758
O75347	TBCA	Tubulin-specific chaperone A (TCP1-chaperonin cofactor A) (Tubulin-folding cofactor A) (CFA)	TBCA_HUMAN	-0.0504288	0.0614005	0.181981		0.39979	0.188135	-0.133853	0.318524	-0.200993
Q9GZM7	TINAGL1 GIS5 LCN7 OLRG2 TINAGL PP6614 PSEC0088 UNQ204/PRO230	Tubulointerstitial nephritis antigen-like (Glucocorticoid-inducible protein 5) (Oxidized LDL-responsive gene 2 protein) (OLRG-2) (Tubulointerstitial nephritis antigen-related protein) (TIN Ag-related protein) (TIN-Ag-RP)	TINAL_HUMAN	0.249928	-0.203256	0.454422	-1.56116	-0.38492	0.556592	0.752944	-0.194526	0.249206
P55327	TPD52	Tumor protein D52 (Protein N8)	TPD52_HUMAN	0.339965
P09012	SNRPA	U1 small nuclear ribonucleoprotein A (U1 snRNP A) (U1-A) (U1A)	SNRPA_HUMAN					0.257771
Q9Y333	LSM2 C6orf28 G7B	U6 snRNA-associated Sm-like protein LSm2 (Protein G7b) (Small nuclear ribonuclear protein D homolog) (snRNP core Sm-like protein Sm-x5)	LSM2_HUMAN	-0.0680239		0.0383481		-0.00104128	0.0890756	-0.15729		-0.175199
Q9Y4Z0	LSM4	U6 snRNA-associated Sm-like protein LSm4 (Glycine-rich protein) (GRP)	LSM4_HUMAN						0.413798
O95777	LSM8	U6 snRNA-associated Sm-like protein LSm8	LSM8_HUMAN	-0.352191	0.135131	0.121607		0.0537096	-0.0417473	-0.0729695		-0.219676
P54578	USP14 TGT	Ubiquitin carboxyl-terminal hydrolase 14 (EC 3.4.19.12) (Deubiquitinating enzyme 14) (Ubiquitin thioesterase 14) (Ubiquitin-specific-processing protease 14)	UBP14_HUMAN	0.718381
P09936	UCHL1	Ubiquitin carboxyl-terminal hydrolase isozyme L1 (UCH-L1) (EC 3.4.19.12) (EC 6.-.-.-) (Neuron cytoplasmic protein 9.5) (PGP 9.5) (PGP9.5) (Ubiquitin thioesterase L1)	UCHL1_HUMAN	2.05444	0.691576	1.5689	1.34361	1.33996	0.99005		-0.258695	0.0623921
P15374	UCHL3	Ubiquitin carboxyl-terminal hydrolase isozyme L3 (UCH-L3) (EC 3.4.19.12) (Ubiquitin thioesterase L3)	UCHL3_HUMAN		0.791868
Q96FW1	OTUB1 OTB1 OTU1 HSPC263	Ubiquitin thioesterase OTUB1 (EC 3.4.19.12) (Deubiquitinating enzyme OTUB1) (OTU domain-containing ubiquitin aldehyde-binding protein 1) (Otubain-1) (hOTU1) (Ubiquitin-specific-processing protease OTUB1)	OTUB1_HUMAN	-0.154443	-0.0413228	-0.0566403	0.129679	0.0205227	-0.120222	-0.00548386	0.0848255	0.0134221
P62979	RPS27A UBA80 UBCEP1	Ubiquitin-40S ribosomal protein S27a (Ubiquitin carboxyl extension protein 80) [Cleaved into: Ubiquitin; 40S ribosomal protein S27a (Small ribosomal subunit protein eS31)]	RS27A_HUMAN	-0.368399	0.150452	-0.120024	0.230151	-0.0772757	-0.353885	-0.00176671	0.0903904	-0.196217
P68036	UBE2L3 UBCE7 UBCH7	Ubiquitin-conjugating enzyme E2 L3 (EC 2.3.2.23) (E2 ubiquitin-conjugating enzyme L3) (L-UBC) (UbcH7) (Ubiquitin carrier protein L3) (Ubiquitin-conjugating enzyme E2-F1) (Ubiquitin-protein ligase L3)	UB2L3_HUMAN	-0.00648546	0.0464643	-0.0525857	0.143672	0.201983	-0.117172	0.025724	-0.0710547	-0.11699
P61088	UBE2N BLU	Ubiquitin-conjugating enzyme E2 N (EC 2.3.2.23) (Bendless-like ubiquitin-conjugating enzyme) (E2 ubiquitin-conjugating enzyme N) (Ubc13) (UbcH13) (Ubiquitin carrier protein N) (Ubiquitin-protein ligase N)	UBE2N_HUMAN					0.152003	-0.00712362			0.131802
Q13404	UBE2V1 CROC1 UBE2V UEV1 P/OKcl.19	Ubiquitin-conjugating enzyme E2 variant 1 (UEV-1) (CROC-1) (TRAF6-regulated IKK activator 1 beta Uev1A)	UB2V1_HUMAN	0.282733	-0.185033	0.000709638	0.160287	0.351657	0.237189	-0.00282778		-0.0133801
Q15819	UBE2V2 MMS2 UEV2	Ubiquitin-conjugating enzyme E2 variant 2 (DDVit 1) (Enterocyte differentiation-associated factor 1) (EDAF-1) (Enterocyte differentiation-promoting factor 1) (EDPF-1) (MMS2 homolog) (Vitamin D3-inducible protein)	UB2V2_HUMAN	0.282733			0.160287	0.351657	0.237189		-0.0357717	-0.0133801
P22314	UBA1 A1S9T UBE1	Ubiquitin-like modifier-activating enzyme 1 (EC 6.2.1.45) (Protein A1S9) (Ubiquitin-activating enzyme E1)	UBA1_HUMAN	1.16097	0.298767	0.123889	-0.2531	0.379358	0.821685	-0.141039	-0.200459	0.13089
P05161	ISG15 G1P2 UCRP	Ubiquitin-like protein ISG15 (Interferon-induced 15 kDa protein) (Interferon-induced 17 kDa protein) (IP17) (Ubiquitin cross-reactive protein) (hUCRP)	ISG15_HUMAN	0.563604	-1.20261	-2.13729	-0.604945	-0.700793	-0.31595	-0.181514	0.0959339	-0.129684
P30085	CMPK1 CMK CMPK UCK UMK UMPK	UMP-CMP kinase (EC 2.7.4.14) (Deoxycytidylate kinase) (CK) (dCMP kinase) (Nucleoside-diphosphate kinase) (EC 2.7.4.6) (Uridine monophosphate/cytidine monophosphate kinase) (UMP/CMP kinase) (UMP/CMPK)	KCY_HUMAN	-0.15796	0.670476	-0.183699	-0.153405	-0.177136	0.228753	-0.0561669	-0.153663	0.00282735
P00749	PLAU	Urokinase-type plasminogen activator (U-plasminogen activator) (uPA) (EC 3.4.21.73) [Cleaved into: Urokinase-type plasminogen activator long chain A; Urokinase-type plasminogen activator short chain A; Urokinase-type plasminogen activator chain B]	UROK_HUMAN	0.616033	0.394095	0.990207	-0.719584	-0.460045	0.656427	0.244792	-0.186428	0.267301
P06132	UROD	Uroporphyrinogen decarboxylase (UPD) (URO-D) (EC 4.1.1.37)	DCUP_HUMAN	0.141072	0.359356	-0.0836526			0
Q16851	UGP2 UGP1	UTP--glucose-1-phosphate uridylyltransferase (EC 2.7.7.9) (UDP-glucose pyrophosphorylase) (UDPGP) (UGPase)	UGPA_HUMAN						-0.00165352	-0.173129		0.0929949
P54727	RAD23B	UV excision repair protein RAD23 homolog B (HR23B) (hHR23B) (XP-C repair-complementing complex 58 kDa protein) (p58)	RD23B_HUMAN		-0.0277518		0.132488		-0.0951159
Q96QK1	VPS35 MEM3 TCCCTA00141	Vacuolar protein sorting-associated protein 35 (hVPS35) (Maternal-embryonic 3) (Vesicle protein sorting 35)	VPS35_HUMAN			-0.275868
P08670	VIM	Vimentin	VIME_HUMAN					-0.108678
P18206	VCL	Vinculin (Metavinculin) (MV)	VINC_HUMAN	0.368363	0.0105332	-0.107926	-0.239233	-0.0128453	0.0257148	0.0525305	0.00545945	0.123726
Q14508	WFDC2 HE4 WAP5	WAP four-disulfide core domain protein 2 (Epididymal secretory protein E4) (Major epididymis-specific protein E4) (Putative protease inhibitor WAP5)	WFDC2_HUMAN						-0.77945
O75083	WDR1	WD repeat-containing protein 1 (Actin-interacting protein 1) (AIP1) (NORI-1)	WDR1_HUMAN		0.430111	0.158324	-0.343316	-0.0197633		-0.124007	0.172698
Q9NQW7	XPNPEP1 XPNPEPL XPNPEPL1	Xaa-Pro aminopeptidase 1 (EC 3.4.11.9) (Aminoacylproline aminopeptidase) (Cytosolic aminopeptidase P) (Soluble aminopeptidase P) (sAmp) (X-Pro aminopeptidase 1) (X-prolyl aminopeptidase 1, soluble)	XPP1_HUMAN	-0.73397
P12955	PEPD PRD	Xaa-Pro dipeptidase (X-Pro dipeptidase) (EC 3.4.13.9) (Imidodipeptidase) (Peptidase D) (Proline dipeptidase) (Prolidase)	PEPD_HUMAN	0.0125712	-0.07211	-0.248416			0.0484248	-0.037563		0.0850126
P16989	YBX3 CSDA DBPA	Y-box-binding protein 3 (Cold shock domain-containing protein A) (DNA-binding protein A) (Single-strand DNA-binding protein NF-GMB)	YBOX3_HUMAN			-0.208295		0.295819		-0.499443
